# Supplementary material for: Small-area variation in child under-vaccination in India: a multilevel analysis of cross-sectional data from 36 states and Union Territories, 707 districts, and 22,349 small-area clusters
Source: PubMed Central journal article supplement — Lancet Reg Health Southeast Asia. 2024 Nov 8;32:100504. doi: 10.1016/j.lansea.2024.100504 (PMC11583726; doi:10.1016/j.lansea.2024.100504), 2024-11-08
Supplement: mmc1.pdf [file mmc1.pdf]

## **SUPPLEMENTARY APPENDIX**

SUPPLEMENT TO:

Johri M, Rajpal S, Kim, R. Subramanian SV. Small-area variation in child under-vaccination in India: A multilevel analysis of 36 states and Union Territories, 707 districts, and 22,349 small-area clusters

|                                                                                                                                                                                                                                                                              |           |
|------------------------------------------------------------------------------------------------------------------------------------------------------------------------------------------------------------------------------------------------------------------------------|-----------|
| <b>1. SUPPLEMENTARY METHODS</b>                                                                                                                                                                                                                                              | <b>4</b>  |
| 1.1 The National Family Health Survey 2019-21 (NFHS-5)                                                                                                                                                                                                                       | 4         |
| 1.2 Construction of the analysis sample                                                                                                                                                                                                                                      | 5         |
| Figure S1. Flow diagram describing construction of the analysis sample, National Family Health Survey 2019-21 (NFHS-5), India                                                                                                                                                | 5         |
| 1.3 Statistical convergence of the Bayesian analysis                                                                                                                                                                                                                         | 6         |
| Figure S2. Trace plots - MCMC diagnostics for all four outcomes, Sample – All Clusters                                                                                                                                                                                       | 6         |
| Table S1. MCMC Diagnostics Summary for all four outcomes, Sample – All Clusters                                                                                                                                                                                              | 7         |
| Figure S3. Trace Plots – MCMC Diagnostics for all four outcomes (excluding singleton clusters)                                                                                                                                                                               | 8         |
| Table S2. MCMC Diagnostics Summary for all four outcomes (excluding singleton clusters).                                                                                                                                                                                     | 9         |
| <b>2. SUPPLEMENTARY RESULTS</b>                                                                                                                                                                                                                                              | <b>10</b> |
| <b>Main analysis</b>                                                                                                                                                                                                                                                         | <b>10</b> |
| Table S3. Geographic variance partitioning for four indicators of child under-vaccination, NFHS-5, India                                                                                                                                                                     | 10        |
| Figure S4. Correlation plots for the district-level prevalence between the four indicators of child under-vaccination, NFHS-5, India                                                                                                                                         | 11        |
| Figure S5. Correlation plots for the cluster-level prevalence between the four indicators of child under-vaccination, NFHS-5, India (sample excluding singleton clusters)                                                                                                    | 12        |
| Table S4. Prevalence of child under-vaccination across 707 districts, NFHS-5, India                                                                                                                                                                                          | 13        |
| Table S5. Distribution of 707 districts by district mean prevalence and within-district, between-cluster standard deviation (SD) for four indicators of child under-vaccination, NFHS-5, India                                                                               | 34        |
| Figure S6. Dot plots showing the distribution of standard deviations (SDs) for four indicators of child under-vaccination across 707 districts, NFHS-5, India                                                                                                                | 35        |
| Figure S7. Box plots of predicted small-area cluster <sup>1</sup> mean prevalence for four indicators of under-vaccination across states and Union Territories, National Family Health Survey 2019-21, India (without outliers)                                              | 36        |
| <b>Sensitivity Analysis 1: Analysis excluding singleton clusters</b>                                                                                                                                                                                                         | <b>37</b> |
| Table S6: Cluster distribution by sample size per cluster, sub-optimally vaccinated children, India, National Family Health Survey (NFHS-5) 2019-2021 <sup>1</sup>                                                                                                           | 37        |
| Table S7: Prevalence of child under-vaccination across states and Union Territories, India, National Family Health Survey (NFHS-5) 2019-2021 <sup>1</sup> (sample excluding singleton clusters)                                                                              | 38        |
| Figure S8. Geographic variance partitioning (%) by clusters, districts and states for four indicators of child under-vaccination, National Family Health Survey 2019-21 (NFHS-5), India (sample excluding singleton clusters)                                                | 41        |
| Table S8. Geographic variance partitioning for four indicators of child under-vaccination, NFHS-5, India (sample excluding singleton clusters)                                                                                                                               | 42        |
| Figure S9: Maps of district-level prevalence and within-district small-area variations in the prevalence of zero-dose (ZD) children and children with basic immunisation incomplete (BI), National Family Health Survey 2019-21, India (sample excluding singleton clusters) | 43        |
| Figure S10: Maps of district-level prevalence and within-district small-area variations in the prevalence of prevalence of non-receipt of measles-rubella (MR) vaccination, National Family Health Survey 2019-21, India (sample excluding singleton clusters)               | 44        |
| Figure S11. Box plots of predicted small-area cluster <sup>1</sup> mean prevalence for four indicators of under-vaccination across states and Union Territories, National Family Health Survey 2019-21, India (sample excluding singleton clusters)                          | 45        |

|                                                                                                                                                                                                                                                                                                     |           |
|-----------------------------------------------------------------------------------------------------------------------------------------------------------------------------------------------------------------------------------------------------------------------------------------------------|-----------|
| <b>Figure S12. Box plots of predicted small-area cluster<sup>1</sup> mean prevalence for four indicators of under-vaccination across states and Union Territories, National Family Health Survey 2019-21, India (sample excluding singleton clusters, no outliers)</b>                              | <b>46</b> |
| <b>Table S9. Geographic variance partitioning for four indicators of child under-vaccination, NFHS-5, India (sample with 5 or more children per cluster)</b>                                                                                                                                        | <b>47</b> |
| <b>Figure S13. Box plots of predicted small-area cluster<sup>1</sup> mean prevalence for four indicators of under-vaccination across states and Union Territories, National Family Health Survey 2019-21, India (sample including clusters with 5 or more children)</b>                             | <b>48</b> |
| <b>Sensitivity Analysis 2: Decomposition of the Basic Immunisation Incomplete indicator</b>                                                                                                                                                                                                         | <b>49</b> |
| <b>Table S10. Geographic variance partitioning for failure to receive DTP3/PENTA3 and OPV3, NFHS-5, India</b>                                                                                                                                                                                       | <b>49</b> |
| <b>Figure S14. Maps of district-level mean prevalence and within-district small-area variations in the prevalence of children without three doses of oral polio vaccine, NFHS-5, India (sample: all clusters)</b>                                                                                   | <b>50</b> |
| <b>Figure S15. Maps of district-level mean prevalence and within-district small-area variations in the prevalence of children without three doses of diphtheria-tetanus-pertussis-containing vaccine, NFHS-5, India (sample: all clusters)</b>                                                      | <b>51</b> |
| <b>Figure S16. Box plots of predicted small-area cluster<sup>1</sup> mean prevalence of children without three doses of oral polio vaccine (OPV3) across states and Union Territories, National Family Health Survey 2019-21, India (sample: all clusters)</b>                                      | <b>52</b> |
| <b>Figure S17. Box plots of predicted small-area cluster<sup>1</sup> mean prevalence of children without three doses of oral polio vaccine (OPV3) across states and Union Territories, National Family Health Survey 2019-21, India (sample excluding singleton clusters)</b>                       | <b>53</b> |
| <b>Figure S18. Box plots of predicted small-area cluster<sup>1</sup> mean prevalence of children without three doses of diphtheria-tetanus-pertussis-containing vaccine across states and Union Territories, National Family Health Survey 2019-21, India (sample: all clusters)</b>                | <b>54</b> |
| <b>Figure S19. Box plots of predicted small-area cluster<sup>1</sup> mean prevalence of children without three doses of diphtheria-tetanus-pertussis-containing vaccine across states and Union Territories, National Family Health Survey 2019-21, India (sample excluding singleton clusters)</b> | <b>55</b> |
| <b>Sensitivity Analysis 3: Child age</b>                                                                                                                                                                                                                                                            | <b>56</b> |
| <b>Table S11. Prevalence of under-vaccination outcomes among children by age groups, NFHS-5, India</b>                                                                                                                                                                                              | <b>56</b> |

## 1. SUPPLEMENTARY METHODS

### 1.1 The National Family Health Survey 2019-21 (NFHS-5)

The NFHS series is part of the Demographic and Health Surveys (DHS) Program, which has conducted more than 400 surveys in over 90 countries. Initiated in 1992-93 to provide estimates of important indicators on population, health and nutrition for India, the NFHS surveys contribute essential data on health and family welfare and on key emerging issues. The NFHS-5 (2019-2021) is the fifth survey in India's NFHS series.

All five NFHS surveys covered geographic areas comprising more than 99% of India's population. The sampling approach was refined over survey rounds to achieve increasingly fine geographic representation. In NFHS-I (1992-93), the goal was to generate national and state-level estimates<sup>1</sup>, in NFHS-2 (1998-99), to generate national and state-level estimates, rural-urban estimates for most states, regional estimates for four states, and estimates for three major cities,<sup>2</sup> and in NFHS-3 (2005-06) to generate national and state-level estimates, rural-urban estimates for all states, and estimates for the slum and non-slum populations of eight major cities.<sup>3</sup> District-level representation was first achieved in the NFHS-4 (2015-16), which was designed to provide estimates for all 29 states, 7 union territories, and 640 districts, as well as the slum populations of 8 major cities.<sup>4</sup> The NFHS-5 provides representative information for all of India's 707 districts (as of March 31, 2017), 28 states, and 8 union territories.<sup>5</sup> The original sizes of the surveys were (number of households) NFHS-1 (88,562),<sup>1</sup> NFHS-2 (92,486),<sup>2</sup> NFHS-3 (109,041),<sup>3</sup> NFHS-4 (609,120),<sup>4</sup> and NFHS-5 (636,699).<sup>5</sup>

Although the NFHS-5 included all states and union territories and achieved excellent geographical coverage, some areas, including conflict-affected, remote, or small, low-density settings, may nonetheless have been excluded. Notably, the NFHS-5 was conducted in part during the context of the Covid-19 pandemic. Although survey roll-out was adjusted, data collection methods (face-to-face interviews) remained unchanged throughout the NFHS-5, so that representativity and comparability between the phases were preserved.

The NFHS surveys divide populations by urban and rural area of residence and use the most recent available national census data to define the sampling frame. The NFHS-5 sample is a stratified two-stage sample. In the first stage, India's 2011 census served as the sampling frame for the selection of primary sampling units (PSUs). The sampling frame was divided into geographic regions (states, UTs, districts) and the lowest level geographies (districts) were further subdivided into urban/rural strata. In rural areas, PSUs were villages; in urban areas, PSUs were Census Enumeration blocks. The NFHS surveys used a multistage design with stratified sampling for specific groups of interest, including scheduled castes and tribes, and women with low levels of literacy. In each rural stratum, six approximately equal substrata were created reflecting population size and the proportion belonging to a scheduled caste or tribe (SC/ST). Within each substratum, PSUs were sorted by the literacy rate of females 6 years of age and older, and selected for inclusion using probability proportional to size (PPS) systematic sampling (a random sampling method for ordered sampling frames based on a random starting point and a consistent sampling interval). In urban areas, PSUs were sorted by the proportion SC/ST and selected using PPS systematic sampling. In the second stage, prior to the main survey, a complete household enumeration was conducted in each selected rural and urban PSU. Selected PSUs with 300 households or more were divided into segments of approximately 100-150 households, and two segments were randomly selected using PPS systematic sampling. Thus, an NFHS-5 cluster is either a PSU or a segment of a PSU. Finally, in every included rural and urban cluster, a fixed number of 22 households was selected from the enumeration list for the survey with equal probability using systematic selection.<sup>5</sup> We applied the appropriate survey sampling weights to adjust for the multistage design and ensure that prevalence estimates are representative of the population.

The NFHS surveys have consistently achieved very high response rates of 95% or higher. The NFHS-5 gathered information from 636,699 households, 724,115 women, and 101,839 men, achieving a household response rate of 97.5%, while 96.9% of eligible women completed the woman's questionnaire.<sup>5</sup> As is standard in vaccination coverage surveys, in the NFHS series, vaccination data is collected from two sources, the vaccination card and caregiver recall. The vaccination history data captured in the NFHS-5 are virtually all pre-pandemic. WHO declared Covid-19 a pandemic on March 11, 2020. The last NFHS-5 data collection date is 30 April 2021. Vaccination data are collected from children 12-23 months of age. Hence, the latest date for which data would have been collected represents vaccination delivery experiences at latest on 30 April 2020.

## 1.2 Construction of the analysis sample

Figure S1. Flow diagram describing construction of the analysis sample, National Family Health Survey 2019-21 (NFHS-5), India

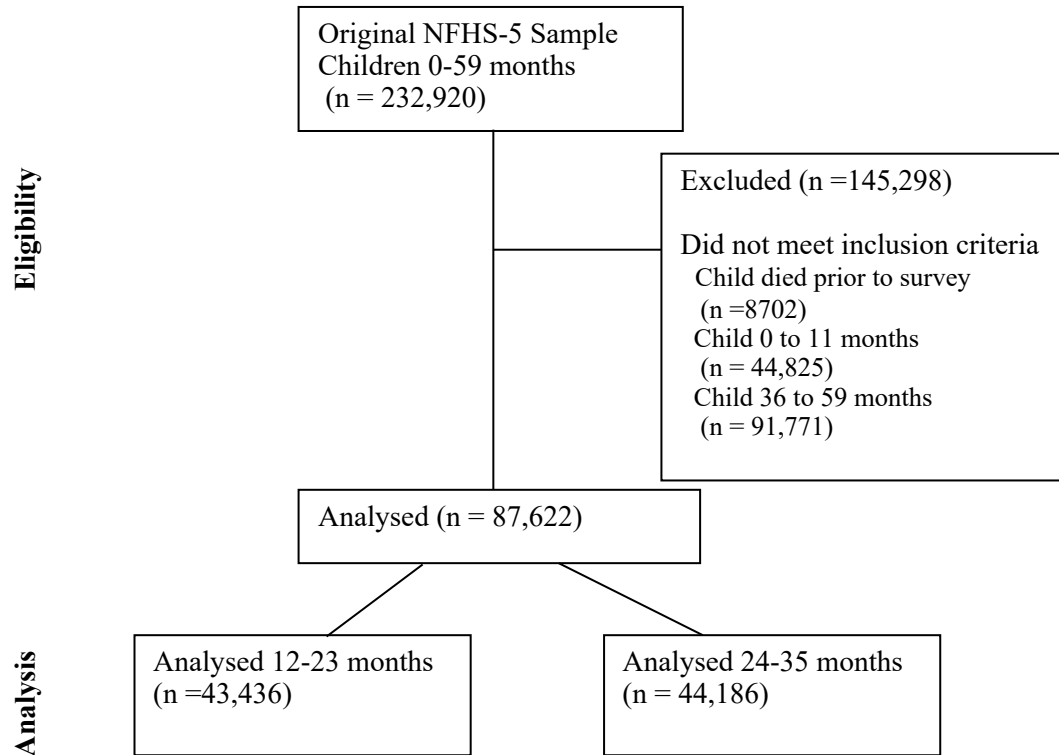

Note: the raw dataset included 232,920 children from 168,273 households. After application of exclusion criteria, the analysis included 87,622 children from 85,131 households.

### 1.3 Statistical convergence of the Bayesian analysis

Figure S2. Trace plots - MCMC diagnostics for all four outcomes, Sample – All Clusters

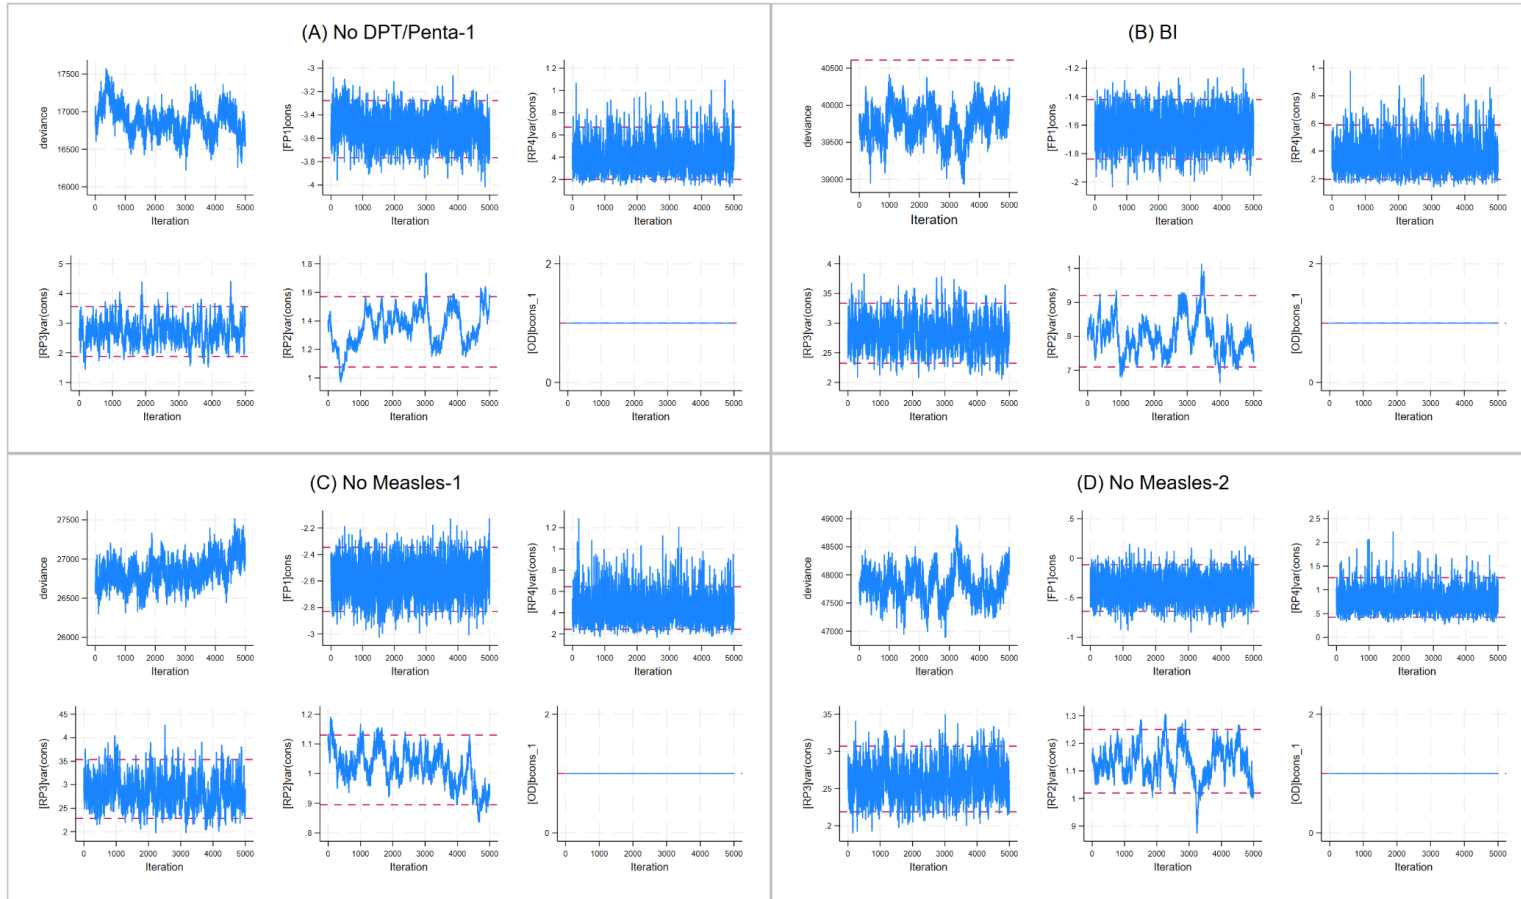

**Table S1. MCMC Diagnostics Summary for all four outcomes, Sample – All Clusters**

| No DPT/Penta-1 |            |           |      |       |            |           |
|----------------|------------|-----------|------|-------|------------|-----------|
| Mean           | Mean       | Std. Dev. | ESS  | P     | [95% Cred. | Interval] |
| [FP1]cons      | -3.511299  | 0.123872  | 285  | 0.00  | -3.76648   | -3.2775   |
| [RP4]var(co~)  | 0.381632   | 0.123139  | 971  | 0.00  | 0.200615   | 0.670445  |
| [RP3]var(co~)  | 0.2678542  | 0.040876  | 141  | 0.00  | 0.187711   | 0.355834  |
| [RP2]var(co~)  | 1.355326   | 0.126838  | 16   | 0.00  | 1.076681   | 1.569618  |
| [OD]bcons_1    | 1          | 0         | 0    | 0.00  | 1          | 1         |
| BI             |            |           |      |       |            |           |
| Mean           | Mean       | Std. Dev. | ESS  | P     | [95% Cred. | Interval] |
| [FP1]cons      | -1.62759   | 0.107153  | 1835 | 0     | -1.83877   | -1.42045  |
| [RP4]var(co~)  | 0.3436714  | 0.100814  | 1216 | 0     | 0.194366   | 0.588587  |
| [RP3]var(co~)  | 0.2800951  | 0.025636  | 339  | 0     | 0.232396   | 0.333538  |
| [RP2]var(co~)  | 0.8011783  | 0.054403  | 22   | 0     | 0.709703   | 0.920645  |
| [OD]bcons_1    | 1          | 0         | 0    | 0     | 1          | 1         |
| No Measles-1   |            |           |      |       |            |           |
| Mean           | Mean       | Std. Dev. | ESS  | P     | [95% Cred. | Interval] |
| [FP1]cons      | -2.58614   | 0.121336  | 2035 | 0     | -2.83139   | -2.34627  |
| [RP4]var(co~)  | 0.4310115  | 0.12778   | 1394 | 0     | 0.243862   | 0.740247  |
| [RP3]var(co~)  | 0.2848811  | 0.031993  | 147  | 0     | 0.228133   | 0.353605  |
| [RP2]var(co~)  | 1.021608   | 0.060789  | 19   | 0     | 0.894799   | 1.129942  |
| [OD]bcons_1    | 1          | 0         | 0    | 0     | 1          | 1         |
| No Measles-2   |            |           |      |       |            |           |
| Mean           | Mean       | Std. Dev. | ESS  | P     | [95% Cred. | Interval] |
| [FP1]cons      | -0.3827019 | 0.149583  | 2693 | 0.005 | -0.67167   | -0.0835   |
| [RP4]var(co~)  | 0.7443651  | 0.216115  | 1344 | 0     | 0.421868   | 1.257089  |
| [RP3]var(co~)  | 0.2600061  | 0.02255   | 331  | 0     | 0.218736   | 0.307105  |
| [RP2]var(co~)  | 1.132228   | 0.061645  | 29   | 0     | 1.019771   | 1.249906  |
| [OD]bcons_1    | 1          | 0         | 0    | 0     | 1          | 1         |

Figure S3. Trace Plots – MCMC Diagnostics for all four outcomes (excluding singleton clusters)

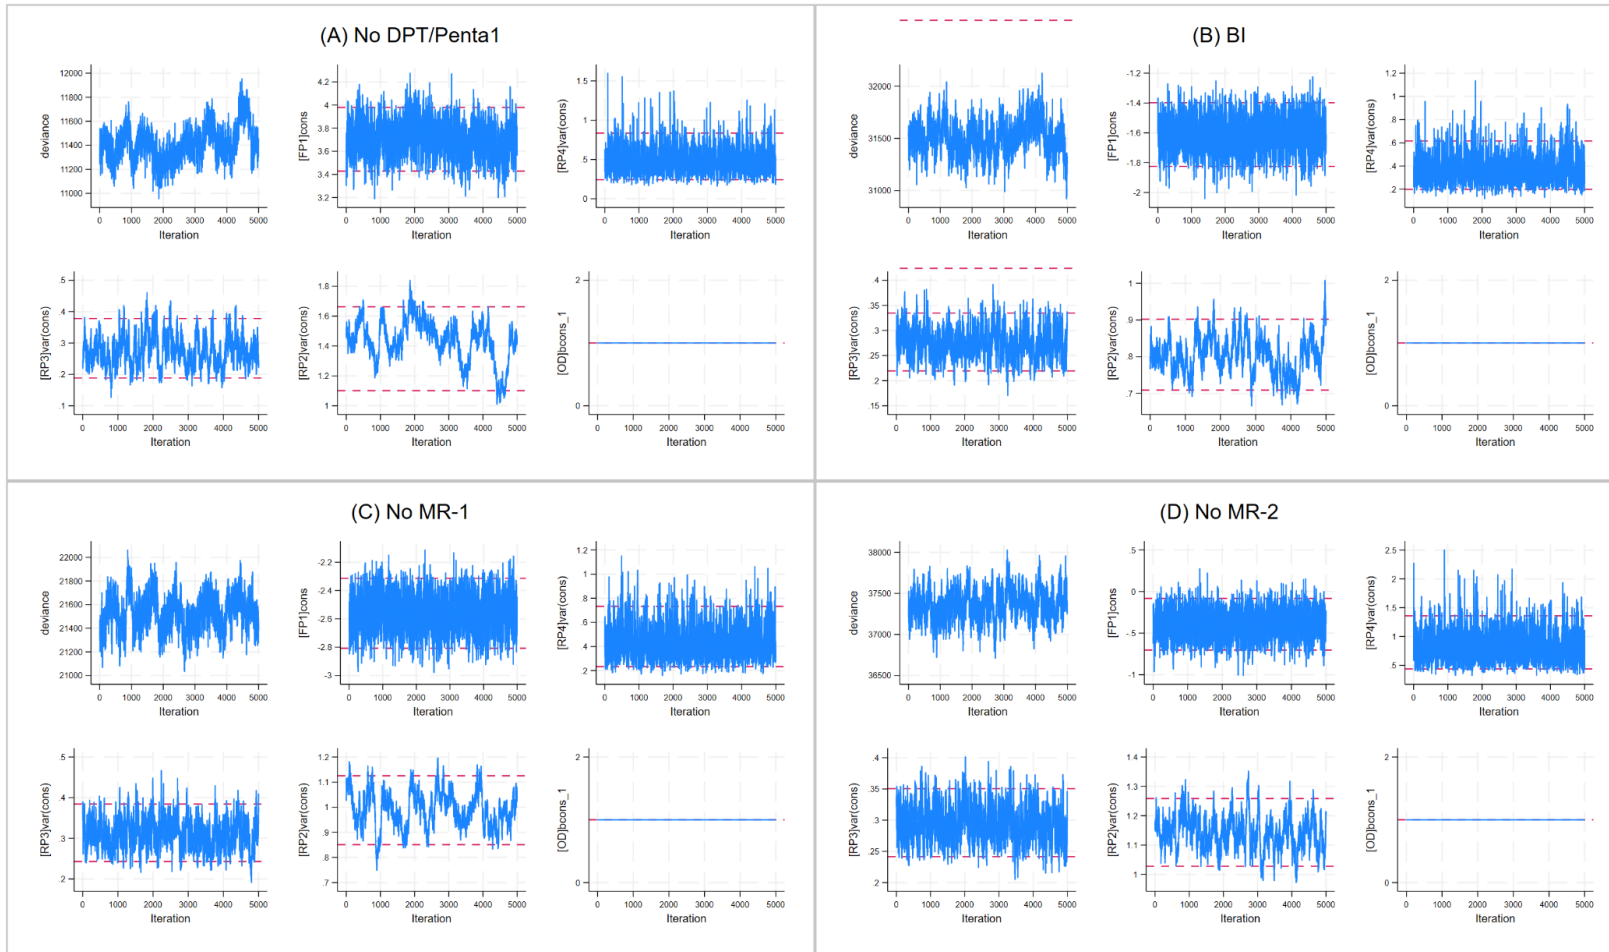



**Table S2. MCMC Diagnostics Summary for all four outcomes (excluding singleton clusters).**

| No DPT/Penta-1 |            |           |      |       |            |           |
|----------------|------------|-----------|------|-------|------------|-----------|
| Mean           | Mean       | Std. Dev. | ESS  | P     | [95% Cred. | Interval] |
| [FP1]cons      | 3.704111   | 0.141525  | 176  | 0.000 | 3.428798   | 3.979099  |
| [RP4]var(co~)  | 0.4697016  | 0.154947  | 956  | 0.000 | 0.242076   | 0.834967  |
| [RP3]var(co~)  | 0.2741438  | 0.049201  | 94   | 0.000 | 0.18864    | 0.377925  |
| [RP2]var(co~)  | 1.433562   | 0.139228  | 16   | 0.000 | 1.10121    | 1.661781  |
| [OD]bcons_1    | 1          | 0         | 0    | 0.000 | 1          | 1         |
| BI             |            |           |      |       |            |           |
| Mean           | Mean       | Std. Dev. | ESS  | P     | [95% Cred. | Interval] |
| [FP1]cons      | -1.608269  | 0.107751  | 2135 | 0.000 | -1.82499   | -1.39827  |
| [RP4]var(co~)  | 0.3550574  | 0.108652  | 1067 | 0.000 | 0.198669   | 0.615803  |
| [RP3]var(co~)  | 0.2743838  | 0.029689  | 215  | 0.000 | 0.219467   | 0.334626  |
| [RP2]var(co~)  | 0.802935   | 0.050505  | 41   | 0.000 | 0.708981   | 0.90206   |
| [OD]bcons_1    | 1          | 0         | 0    | 0.000 | 1          | 1         |
| No MR-1        |            |           |      |       |            |           |
| Mean           | Mean       | Std. Dev. | ESS  | P     | [95% Cred. | Interval] |
| [FP1]cons      | -2.558323  | 0.124609  | 1433 | 0.000 | -2.80783   | -2.31319  |
| [RP4]var(co~)  | 0.4213399  | 0.128479  | 1089 | 0.000 | 0.232508   | 0.732506  |
| [RP3]var(co~)  | 0.3102533  | 0.036892  | 186  | 0.000 | 0.242913   | 0.384294  |
| [RP2]var(co~)  | 0.9894787  | 0.071019  | 38   | 0.000 | 0.85089    | 1.12535   |
| [OD]bcons_1    | 1          | 0         | 0    | 0.000 | 1          | 1         |
| No MR-2        |            |           |      |       |            |           |
| Mean           | Mean       | Std. Dev. | ESS  | P     | [95% Cred. | Interval] |
| [FP1]cons      | -0.3865867 | 0.158326  | 2696 | 0.008 | -0.70415   | -0.08254  |
| [RP4]var(co~)  | 0.7931527  | 0.238964  | 1337 | 0.000 | 0.437627   | 1.358197  |
| [RP3]var(co~)  | 0.2933312  | 0.027921  | 296  | 0.000 | 0.241461   | 0.350466  |
| [RP2]var(co~)  | 1.140801   | 0.057847  | 83   | 0.000 | 1.027814   | 1.258679  |
| [OD]bcons_1    | 1          | 0         | 0    | 0.000 | 1          | 1         |

## 2. SUPPLEMENTARY RESULTS

### Main analysis

**Table S3. Geographic variance partitioning for four indicators of child under-vaccination, NFHS-5, India**

| Overall                      | ZD            | BI            | No MR-1       | No MR-2       |
|------------------------------|---------------|---------------|---------------|---------------|
| <b>Variance Partitioning</b> |               |               |               |               |
| State                        | 0.381 (0.123) | 0.343 (0.101) | 0.431 (0.127) | 0.744 (0.216) |
| District                     | 0.267 (0.040) | 0.281 (0.025) | 0.284 (0.032) | 0.260 (0.022) |
| Cluster                      | 1.355 (0.127) | 0.801 (0.054) | 1.022 (0.061) | 1.132 (0.062) |

Note: Standard errors in parentheses

"Zero-dose" - All surviving children aged 12–23 months who did not receive the first dose of diphtheria, tetanus, and pertussis -containing vaccine.

"BI " - All surviving children aged 12–23 months who did not receive 8 vaccine doses recommended in the first year of life: 1 dose of Bacillus Calmette-Guérin (BCG) vaccine, 3 doses of pentavalent vaccine, 3 doses of oral polio vaccine, 1 dose of measles-rubella vaccine.

"No MR-1" - All surviving children aged 12-23 months who did not receive the first dose of measles-rubella-containing vaccine.

"No MR-2" - All surviving children aged 24-35 months who did not receive the second dose of measles-rubella-containing vaccine.

**Figure S4. Correlation plots for the district-level prevalence between the four indicators of child under-vaccination, NFHS-5, India**

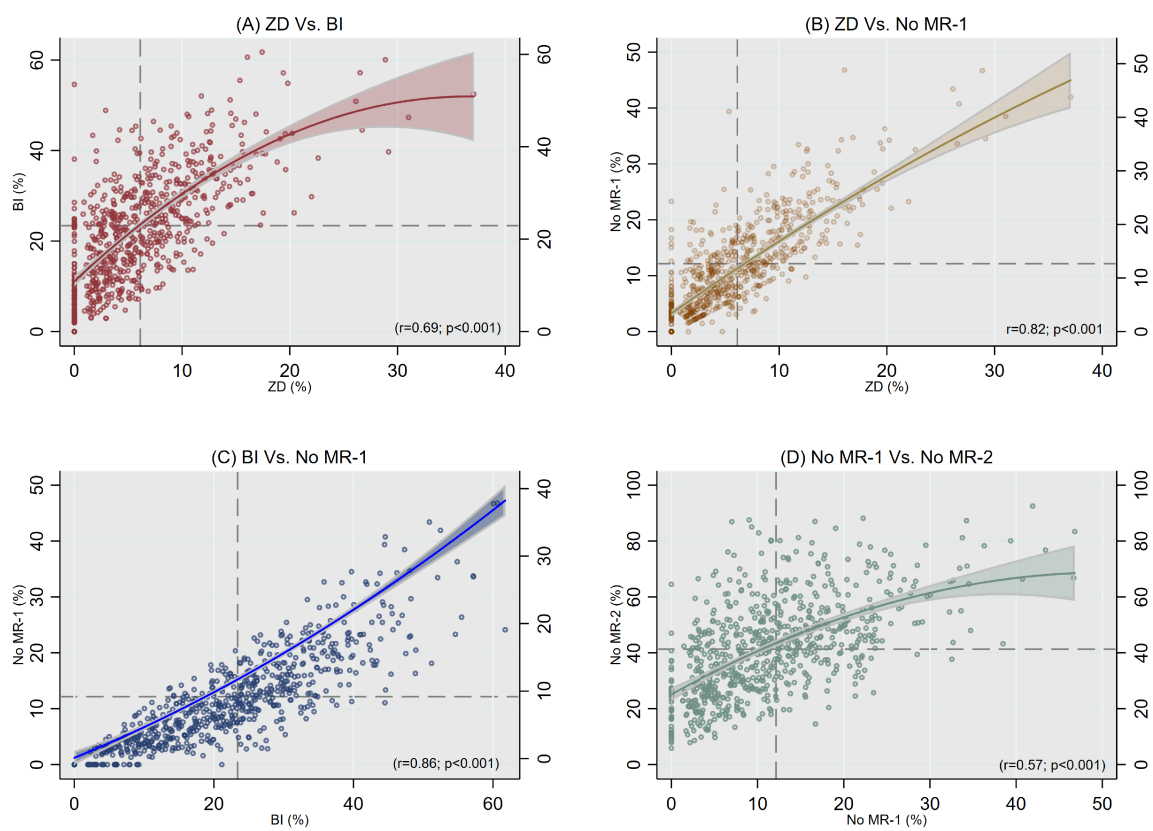

"ZD" - All surviving children aged 12–23 months who did not receive the first dose of diphtheria, tetanus, and pertussis -containing vaccine.

"BI" - Basic incomplete: All surviving children aged 12–23 months who did not receive 8 basic vaccine doses recommended in the first year of life: 1 dose of Bacillus Calmette-Guérin (BCG) vaccine, 3 doses of pentavalent vaccine, 3 doses of oral polio vaccine, 1 dose of measles-rubella vaccine.

"No MR-1" - All surviving children aged 12-23 months who did not receive the first dose of measles-rubella-containing vaccine.

"No MR-2" - All surviving children aged 24-35 months who did not receive the second dose of measles-rubella-containing vaccine.

**Figure S5. Correlation plots for the cluster-level prevalence between the four indicators of child under-vaccination, NFHS-5, India (sample excluding singleton clusters)**

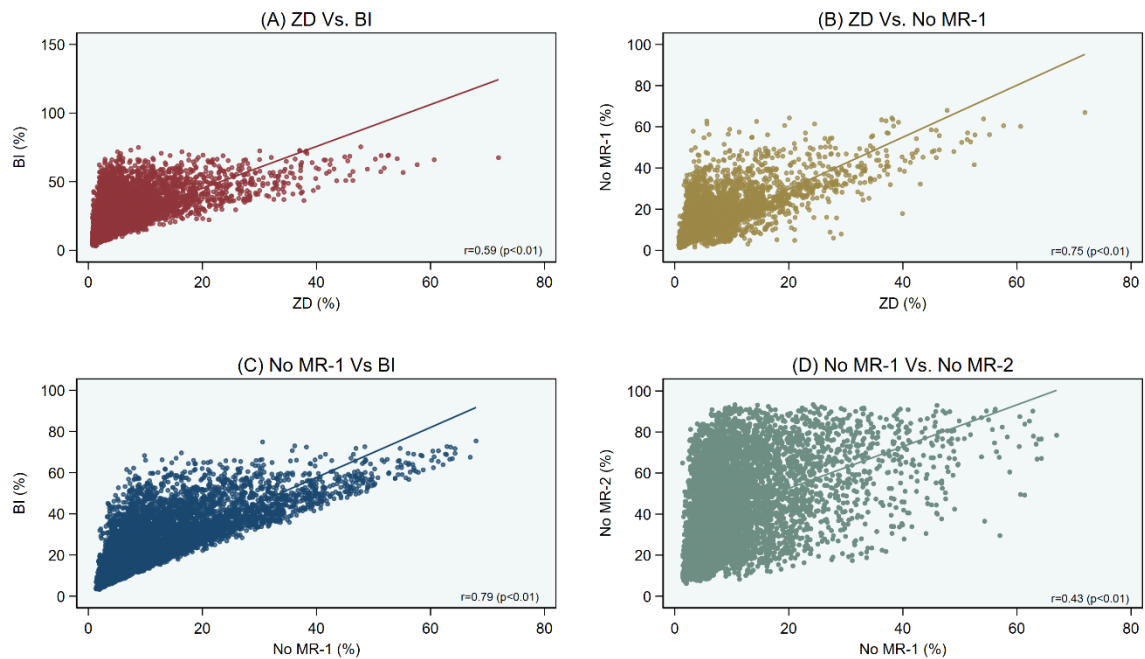

The analysis included  $n=12216$  clusters of size 2 or more

"ZD" - All surviving children aged 12–23 months who did not receive the first dose of diphtheria, tetanus, and pertussis -containing vaccine.

"BI" - Basic incomplete: All surviving children aged 12–23 months who did not receive 8 basic vaccine doses recommended in the first year of life: 1 dose of Bacillus Calmette-Guérin (BCG) vaccine, 3 doses of pentavalent vaccine, 3 doses of oral polio vaccine, 1 dose of measles-rubella vaccine.

"No MR-1" - All surviving children aged 12-23 months who did not receive the first dose of measles-rubella-containing vaccine.

"No MR-2" - All surviving children aged 24-35 months who did not receive the second dose of measles-rubella-containing vaccine.

**Table S4. Prevalence of child under-vaccination across 707 districts, NFHS-5, India**

| DISTRICT      | State            | ZD       |        | BI       |        | No MR-1  |        | No MR-2  |        |
|---------------|------------------|----------|--------|----------|--------|----------|--------|----------|--------|
|               |                  | Mean (%) | SD (%) |
| KUPWARA       | JAMMU & KASHMIR  | 1.86     | 0.60   | 6.24     | 1.54   | 2.70     | 0.59   | 14.59    | 7.59   |
| BADGAM        | JAMMU & KASHMIR  | 1.66     | 0.08   | 6.59     | 2.27   | 3.71     | 1.96   | 16.68    | 10.09  |
| LEH(LADAKH)   | LADAKH           | 1.63     | 0.70   | 10.67    | 4.22   | 7.49     | 4.36   | 37.53    | 15.16  |
| KARGIL        | LADAKH           | 1.29     | 0.06   | 10.61    | 4.81   | 3.72     | 0.72   | 13.71    | 4.81   |
| PUNCH         | JAMMU & KASHMIR  | 1.81     | 0.56   | 7.75     | 2.88   | 3.72     | 1.24   | 26.13    | 11.19  |
| RAJOURI       | JAMMU & KASHMIR  | 1.62     | 0.07   | 6.32     | 1.56   | 3.55     | 1.06   | 14.82    | 7.16   |
| KATHUA        | JAMMU & KASHMIR  | 1.87     | 0.09   | 5.37     | 0.32   | 3.07     | 0.13   | 23.81    | 10.58  |
| BARAMULA      | JAMMU & KASHMIR  | 4.28     | 3.44   | 18.26    | 7.35   | 9.56     | 4.91   | 37.13    | 14.25  |
| BANDIPORE     | JAMMU & KASHMIR  | 4.19     | 3.30   | 8.76     | 3.10   | 4.92     | 2.62   | 38.25    | 11.76  |
| SRINAGAR      | JAMMU & KASHMIR  | 2.57     | 0.98   | 7.81     | 1.69   | 3.85     | 0.97   | 14.57    | 4.98   |
| GANDERBAL     | JAMMU & KASHMIR  | 3.18     | 1.85   | 13.62    | 4.55   | 4.13     | 1.38   | 23.43    | 11.25  |
| PULWAMA       | JAMMU & KASHMIR  | 2.28     | 0.80   | 8.95     | 2.53   | 3.46     | 0.77   | 18.17    | 6.83   |
| SHUPIYAN      | JAMMU & KASHMIR  | 1.77     | 0.10   | 7.84     | 2.17   | 2.82     | 0.11   | 11.63    | 4.54   |
| ANANTNAG      | JAMMU & KASHMIR  | 3.72     | 2.09   | 11.36    | 3.23   | 5.10     | 2.06   | 30.76    | 14.09  |
| KULGAM        | JAMMU & KASHMIR  | 1.66     | 0.06   | 4.95     | 0.81   | 2.54     | 0.10   | 15.86    | 8.53   |
| DODA          | JAMMU & KASHMIR  | 9.40     | 7.30   | 24.92    | 9.89   | 17.34    | 9.75   | 32.24    | 14.90  |
| RAMBAN        | JAMMU & KASHMIR  | 3.50     | 2.78   | 16.03    | 7.39   | 10.76    | 6.89   | 44.12    | 15.28  |
| KISHTWAR      | JAMMU & KASHMIR  | 3.21     | 1.64   | 8.58     | 2.46   | 4.71     | 1.54   | 26.64    | 13.82  |
| UDHAMPUR      | JAMMU & KASHMIR  | 4.34     | 2.95   | 11.10    | 5.16   | 7.51     | 5.01   | 21.91    | 11.20  |
| REASI         | JAMMU & KASHMIR  | 4.09     | 4.16   | 13.65    | 6.43   | 7.10     | 4.75   | 25.35    | 12.23  |
| JAMMU         | JAMMU & KASHMIR  | 2.85     | 1.55   | 11.84    | 3.45   | 5.49     | 2.09   | 25.82    | 11.45  |
| SAMBA         | JAMMU & KASHMIR  | 2.46     | 0.97   | 7.89     | 2.41   | 4.18     | 1.40   | 20.87    | 10.67  |
| CHAMBA        | HIMACHAL PRADESH | 0.88     | 0.04   | 4.20     | 0.25   | 1.90     | 0.07   | 25.76    | 12.48  |
| KANGRA        | HIMACHAL PRADESH | 1.15     | 0.42   | 11.16    | 3.15   | 2.88     | 0.81   | 44.97    | 13.59  |
| LAHUL & SPITI | HIMACHAL PRADESH | 1.18     | 0.50   | 15.23    | 4.47   | 3.55     | 1.37   | 28.46    | 10.57  |
| KULLU         | HIMACHAL PRADESH | 1.87     | 2.02   | 12.67    | 4.75   | 3.93     | 2.51   | 37.02    | 10.05  |
| MANDI         | HIMACHAL PRADESH | 0.90     | 0.04   | 6.31     | 1.48   | 1.81     | 0.07   | 15.64    | 5.82   |
| HAMIRPUR      | HIMACHAL PRADESH | 2.14     | 1.25   | 13.39    | 4.60   | 4.91     | 1.98   | 36.29    | 12.20  |
| UNA           | HIMACHAL PRADESH | 0.88     | 0.03   | 15.72    | 5.22   | 4.48     | 1.95   | 44.71    | 13.79  |
| BILASPUR      | HIMACHAL PRADESH | 0.88     | 0.03   | 4.12     | 0.13   | 1.89     | 0.07   | 18.77    | 7.05   |
| SOLAN         | HIMACHAL PRADESH | 1.26     | 0.55   | 7.56     | 2.05   | 3.21     | 1.12   | 13.06    | 4.64   |
| SIRMAUR       | HIMACHAL PRADESH | 0.82     | 0.04   | 6.47     | 1.94   | 1.68     | 0.07   | 24.29    | 9.26   |
| SHIMLA        | HIMACHAL PRADESH | 0.90     | 0.04   | 5.67     | 1.14   | 2.80     | 0.87   | 18.73    | 10.67  |
| KINNAUR       | HIMACHAL PRADESH | 0.91     | 0.03   | 7.19     | 1.98   | 2.44     | 0.60   | 25.19    | 10.23  |

|                            |             |      |      |       |       |       |      |       |       |
|----------------------------|-------------|------|------|-------|-------|-------|------|-------|-------|
| KAPURTHALA                 | PUNJAB      | 3.17 | 1.45 | 27.48 | 8.56  | 7.33  | 2.49 | 41.45 | 14.65 |
| JALANDHAR                  | PUNJAB      | 2.32 | 0.74 | 11.04 | 2.44  | 4.30  | 0.81 | 41.50 | 12.96 |
| HOSHIARPUR                 | PUNJAB      | 1.84 | 0.07 | 10.64 | 2.79  | 5.60  | 1.76 | 32.98 | 10.20 |
| SHAHID BHAGAT SINGH NAGAR  | PUNJAB      | 1.89 | 0.10 | 6.96  | 0.42  | 3.82  | 0.23 | 26.19 | 8.40  |
| FATEHGARH SAHIB            | PUNJAB      | 3.50 | 2.00 | 16.20 | 5.51  | 7.54  | 2.94 | 30.09 | 10.56 |
| LUDHIANA                   | PUNJAB      | 6.31 | 4.17 | 24.19 | 6.67  | 14.53 | 5.47 | 46.38 | 13.53 |
| MOGA                       | PUNJAB      | 3.03 | 1.55 | 18.82 | 6.51  | 9.87  | 4.16 | 52.41 | 14.64 |
| MUKTSAR                    | PUNJAB      | 4.71 | 2.46 | 35.70 | 10.42 | 13.97 | 5.99 | 48.37 | 14.33 |
| FARIDKOT                   | PUNJAB      | 2.20 | 0.79 | 25.40 | 8.42  | 9.85  | 3.89 | 46.70 | 13.08 |
| BATHINDA                   | PUNJAB      | 3.35 | 1.87 | 31.67 | 8.10  | 11.34 | 4.18 | 52.67 | 13.55 |
| MANSA                      | PUNJAB      | 2.16 | 0.75 | 15.96 | 7.84  | 6.97  | 5.29 | 36.17 | 12.43 |
| PATIALA                    | PUNJAB      | 2.78 | 1.27 | 19.94 | 6.51  | 8.12  | 4.27 | 43.73 | 12.61 |
| AMRITSAR                   | PUNJAB      | 2.88 | 1.41 | 28.50 | 8.25  | 8.18  | 2.89 | 40.56 | 14.83 |
| TARN TARAN                 | PUNJAB      | 2.74 | 1.26 | 17.40 | 5.37  | 8.51  | 3.48 | 29.74 | 11.89 |
| RUPNAGAR                   | PUNJAB      | 5.69 | 3.13 | 17.91 | 6.33  | 8.48  | 4.52 | 33.37 | 11.31 |
| SAHIBZADA AJIT SINGH NAGAR | PUNJAB      | 4.23 | 2.62 | 23.78 | 7.63  | 13.27 | 6.30 | 25.86 | 10.99 |
| SANGRUR                    | PUNJAB      | 2.37 | 0.94 | 12.09 | 3.01  | 5.33  | 1.47 | 42.96 | 12.88 |
| BARNALA                    | PUNJAB      | 2.70 | 1.23 | 30.49 | 9.66  | 10.60 | 3.91 | 43.11 | 10.61 |
| CHANDIGARH                 | CHANDIGARH  | 3.76 | 1.96 | 17.85 | 5.21  | 9.37  | 3.62 | 22.67 | 8.80  |
| UTTARKASHI                 | UTTARAKHAND | 2.36 | 1.18 | 13.60 | 5.17  | 3.05  | 0.93 | 21.67 | 8.86  |
| CHAMOLI                    | UTTARAKHAND | 1.39 | 0.06 | 12.83 | 4.65  | 5.44  | 2.67 | 29.90 | 10.67 |
| RUDRAPRAYAG                | UTTARAKHAND | 2.81 | 2.54 | 9.27  | 3.34  | 4.18  | 2.47 | 24.97 | 9.82  |
| TEHRI GARHWAL              | UTTARAKHAND | 1.41 | 0.07 | 14.29 | 4.33  | 2.85  | 0.62 | 20.83 | 9.14  |
| DEHRADUN                   | UTTARAKHAND | 3.87 | 2.34 | 20.49 | 6.48  | 9.02  | 3.78 | 21.87 | 8.43  |
| GARHWAL                    | UTTARAKHAND | 3.93 | 3.06 | 17.09 | 5.46  | 5.15  | 2.82 | 29.84 | 10.96 |
| PITHORAGARH                | UTTARAKHAND | 1.43 | 0.06 | 6.75  | 1.55  | 2.41  | 0.08 | 25.51 | 9.64  |
| BAGESHWAR                  | UTTARAKHAND | 2.32 | 1.13 | 11.07 | 3.18  | 4.26  | 1.49 | 47.85 | 13.36 |
| ALMORA                     | UTTARAKHAND | 2.73 | 1.43 | 11.72 | 4.50  | 3.75  | 1.13 | 24.50 | 8.92  |
| CHAMPAWAT                  | UTTARAKHAND | 1.32 | 0.05 | 7.76  | 2.80  | 2.69  | 0.57 | 20.43 | 7.36  |
| NAINITAL                   | UTTARAKHAND | 2.18 | 1.05 | 20.81 | 9.61  | 9.43  | 6.77 | 23.84 | 8.86  |
| UDHAM SINGH NAGAR          | UTTARAKHAND | 2.74 | 1.39 | 12.33 | 4.15  | 5.77  | 2.16 | 22.65 | 10.50 |
| HARDWAR                    | UTTARAKHAND | 2.74 | 1.46 | 16.13 | 6.10  | 6.51  | 3.56 | 27.96 | 11.51 |
| PANCHKULA                  | HARYANA     | 2.77 | 1.06 | 11.46 | 4.17  | 4.50  | 1.09 | 25.63 | 8.43  |
| AMBALA                     | HARYANA     | 3.36 | 1.84 | 18.92 | 7.17  | 4.92  | 3.05 | 46.72 | 13.09 |
| YAMUNANAGAR                | HARYANA     | 4.19 | 3.50 | 16.08 | 6.38  | 4.99  | 2.78 | 40.66 | 14.70 |
| KURUKSHETRA                | HARYANA     | 2.23 | 0.94 | 24.58 | 8.30  | 4.81  | 1.75 | 38.42 | 12.29 |

|                |           |       |      |       |       |       |       |       |       |
|----------------|-----------|-------|------|-------|-------|-------|-------|-------|-------|
| KAITHAL        | HARYANA   | 4.43  | 2.35 | 20.14 | 6.59  | 6.36  | 2.33  | 25.67 | 9.33  |
| KARNAL         | HARYANA   | 1.72  | 0.09 | 11.23 | 3.01  | 3.23  | 0.73  | 24.85 | 9.50  |
| PANIPAT        | HARYANA   | 2.83  | 1.41 | 18.35 | 5.99  | 7.43  | 3.11  | 37.88 | 10.94 |
| SONIPAT        | HARYANA   | 4.74  | 2.62 | 15.31 | 5.00  | 8.06  | 3.00  | 55.45 | 14.12 |
| JIND           | HARYANA   | 3.52  | 1.86 | 19.70 | 5.77  | 9.75  | 3.92  | 45.08 | 14.43 |
| FATEHABAD      | HARYANA   | 3.94  | 2.18 | 10.72 | 3.07  | 5.57  | 2.15  | 23.20 | 9.85  |
| SIRSA          | HARYANA   | 2.39  | 0.12 | 11.95 | 3.02  | 5.33  | 1.84  | 40.69 | 9.34  |
| HISAR          | HARYANA   | 2.22  | 0.77 | 14.40 | 5.69  | 4.30  | 1.30  | 34.04 | 13.22 |
| ROHTAK         | HARYANA   | 5.92  | 5.87 | 18.61 | 6.89  | 11.58 | 5.56  | 44.31 | 13.09 |
| JHAJJAR        | HARYANA   | 2.40  | 0.98 | 11.27 | 2.80  | 4.29  | 1.24  | 40.63 | 11.09 |
| MAHENDRAGARH   | HARYANA   | 2.99  | 1.27 | 20.69 | 5.40  | 8.13  | 3.17  | 52.48 | 13.51 |
| REWARI         | HARYANA   | 4.14  | 3.18 | 17.85 | 7.50  | 6.79  | 3.58  | 46.43 | 13.97 |
| GURGAON        | HARYANA   | 5.87  | 3.26 | 34.54 | 12.03 | 11.98 | 6.51  | 35.83 | 14.47 |
| MEWAT          | HARYANA   | 11.19 | 7.09 | 41.84 | 11.57 | 27.86 | 12.24 | 67.67 | 12.68 |
| FARIDABAD      | HARYANA   | 4.00  | 2.83 | 27.73 | 9.68  | 11.91 | 7.85  | 48.79 | 13.85 |
| PALWAL         | HARYANA   | 5.71  | 3.08 | 27.55 | 8.72  | 9.92  | 4.32  | 57.68 | 15.25 |
| GANGANAGAR     | RAJASTHAN | 2.21  | 0.91 | 10.19 | 4.05  | 4.16  | 1.34  | 49.29 | 15.14 |
| HANUMANGARH    | RAJASTHAN | 3.11  | 1.91 | 15.23 | 5.63  | 5.21  | 2.28  | 57.51 | 15.51 |
| BIKANER        | RAJASTHAN | 6.42  | 3.68 | 22.49 | 7.84  | 11.68 | 5.59  | 59.40 | 13.88 |
| CHURU          | RAJASTHAN | 3.79  | 4.06 | 22.25 | 8.60  | 8.25  | 5.57  | 50.80 | 15.99 |
| JHUNJHUNUN     | RAJASTHAN | 1.47  | 0.08 | 11.77 | 3.72  | 5.10  | 2.02  | 51.00 | 16.14 |
| ALWAR          | RAJASTHAN | 6.15  | 5.03 | 30.81 | 9.92  | 12.67 | 7.64  | 59.66 | 13.65 |
| BHARATPUR      | RAJASTHAN | 3.76  | 3.20 | 29.95 | 10.35 | 11.54 | 6.81  | 68.95 | 10.92 |
| DHAULPUR       | RAJASTHAN | 1.31  | 0.07 | 12.36 | 5.10  | 3.32  | 1.14  | 50.27 | 14.73 |
| KARAULI        | RAJASTHAN | 2.15  | 0.91 | 10.75 | 3.02  | 4.03  | 1.25  | 56.11 | 15.61 |
| SAWAI MADHOPUR | RAJASTHAN | 4.56  | 3.32 | 36.32 | 8.98  | 15.23 | 7.03  | 43.81 | 13.80 |
| DAUSA          | RAJASTHAN | 1.72  | 0.63 | 8.15  | 2.41  | 3.77  | 1.19  | 48.73 | 13.78 |
| JAIPUR         | RAJASTHAN | 2.13  | 0.89 | 10.41 | 3.40  | 2.95  | 0.69  | 44.01 | 13.67 |
| SIKAR          | RAJASTHAN | 3.39  | 1.70 | 25.49 | 8.22  | 8.81  | 2.99  | 47.10 | 16.20 |
| NAGPUR         | RAJASTHAN | 2.71  | 1.39 | 16.71 | 4.28  | 5.79  | 2.26  | 41.30 | 12.91 |
| JODHPUR        | RAJASTHAN | 3.86  | 1.92 | 15.66 | 6.59  | 7.56  | 4.41  | 43.27 | 16.49 |
| JAISALMER      | RAJASTHAN | 7.63  | 6.79 | 22.40 | 9.83  | 12.73 | 8.59  | 43.22 | 17.63 |
| BARMER         | RAJASTHAN | 3.53  | 2.13 | 8.27  | 2.95  | 5.60  | 2.87  | 38.66 | 17.51 |
| JALOR          | RAJASTHAN | 4.40  | 2.60 | 20.15 | 9.57  | 8.78  | 4.34  | 48.73 | 16.74 |
| SIROHI         | RAJASTHAN | 3.38  | 2.45 | 12.28 | 3.72  | 4.99  | 2.33  | 59.20 | 13.91 |
| PALI           | RAJASTHAN | 1.78  | 0.56 | 9.28  | 2.81  | 3.59  | 1.11  | 24.42 | 8.22  |
| AJMER          | RAJASTHAN | 1.90  | 0.67 | 17.86 | 5.89  | 5.15  | 1.97  | 62.28 | 13.39 |

|                     |               |       |      |       |       |       |      |       |       |
|---------------------|---------------|-------|------|-------|-------|-------|------|-------|-------|
| TONK                | RAJASTHAN     | 2.46  | 1.14 | 18.98 | 5.99  | 7.08  | 2.90 | 45.18 | 12.39 |
| BUNDI               | RAJASTHAN     | 1.71  | 0.55 | 18.40 | 6.49  | 5.99  | 2.07 | 37.41 | 13.80 |
| BHILWARA            | RAJASTHAN     | 3.07  | 1.80 | 11.78 | 3.16  | 6.88  | 2.35 | 62.16 | 13.44 |
| RAJSAMAND           | RAJASTHAN     | 4.84  | 2.74 | 23.16 | 7.88  | 8.79  | 3.37 | 57.70 | 15.34 |
| DUNGARPUR           | RAJASTHAN     | 1.93  | 0.69 | 14.71 | 3.50  | 3.77  | 1.04 | 47.12 | 13.68 |
| BANSWARA            | RAJASTHAN     | 2.07  | 0.84 | 14.48 | 4.71  | 5.02  | 1.82 | 41.81 | 14.39 |
| CHITTAURGARH        | RAJASTHAN     | 1.94  | 0.79 | 11.83 | 3.30  | 3.78  | 1.20 | 40.47 | 13.48 |
| KOTA                | RAJASTHAN     | 1.81  | 0.61 | 11.38 | 3.96  | 4.30  | 2.21 | 44.38 | 13.44 |
| BARAN               | RAJASTHAN     | 1.93  | 0.85 | 9.32  | 4.20  | 3.55  | 1.70 | 33.61 | 13.87 |
| JHALAWAR            | RAJASTHAN     | 1.67  | 0.41 | 15.14 | 4.80  | 6.36  | 2.30 | 29.30 | 13.10 |
| UDAIPUR             | RAJASTHAN     | 2.80  | 1.37 | 12.28 | 3.95  | 6.08  | 2.43 | 38.36 | 14.62 |
| PRATAPGARH          | RAJASTHAN     | 1.50  | 0.08 | 20.28 | 7.07  | 5.79  | 2.16 | 60.83 | 16.03 |
| SAHARANPUR          | UTTAR PRADESH | 3.67  | 2.90 | 11.25 | 3.76  | 5.79  | 2.81 | 19.14 | 9.22  |
| BIJNOR              | UTTAR PRADESH | 3.74  | 2.37 | 11.04 | 3.31  | 7.21  | 3.34 | 17.68 | 7.34  |
| RAMPUR              | UTTAR PRADESH | 3.31  | 2.13 | 19.05 | 5.91  | 7.17  | 2.97 | 41.78 | 13.11 |
| JYOTIBA PHULE NAGAR | UTTAR PRADESH | 6.74  | 4.79 | 25.04 | 8.61  | 12.97 | 6.89 | 30.39 | 11.71 |
| MEERUT              | UTTAR PRADESH | 3.72  | 2.18 | 16.78 | 4.28  | 6.91  | 2.27 | 21.65 | 10.56 |
| BAGHPAT             | UTTAR PRADESH | 5.65  | 4.29 | 16.94 | 6.00  | 10.76 | 4.92 | 36.80 | 13.22 |
| GAUTAM BUDDHA NAGAR | UTTAR PRADESH | 5.86  | 3.16 | 28.14 | 7.69  | 10.82 | 4.26 | 31.97 | 12.84 |
| BULANDSHAHR         | UTTAR PRADESH | 6.94  | 4.34 | 29.64 | 8.57  | 17.41 | 7.32 | 30.38 | 11.75 |
| ALIGARH             | UTTAR PRADESH | 5.77  | 3.11 | 26.69 | 6.56  | 13.57 | 5.49 | 28.91 | 10.49 |
| MAHAMAYA NAGAR      | UTTAR PRADESH | 4.64  | 2.38 | 26.41 | 8.87  | 10.09 | 3.63 | 53.44 | 12.01 |
| MATHURA             | UTTAR PRADESH | 3.48  | 2.01 | 24.54 | 7.97  | 8.02  | 2.97 | 44.28 | 14.12 |
| AGRA                | UTTAR PRADESH | 2.38  | 0.58 | 20.61 | 10.07 | 5.14  | 1.73 | 30.57 | 13.73 |
| FIROZABAD           | UTTAR PRADESH | 4.18  | 2.05 | 30.15 | 8.45  | 15.74 | 6.32 | 51.63 | 14.14 |
| MAINPURI            | UTTAR PRADESH | 3.74  | 1.80 | 23.30 | 6.88  | 9.09  | 3.60 | 41.68 | 11.98 |
| BAREILLY            | UTTAR PRADESH | 5.21  | 4.43 | 25.99 | 8.88  | 10.00 | 5.05 | 32.38 | 10.46 |
| PILIBHIT            | UTTAR PRADESH | 3.33  | 1.17 | 10.68 | 2.82  | 5.99  | 1.58 | 30.87 | 11.24 |
| SHAHJAHANPUR        | UTTAR PRADESH | 4.81  | 3.30 | 21.73 | 6.37  | 9.23  | 3.75 | 25.61 | 9.28  |
| KHERI               | UTTAR PRADESH | 11.26 | 6.51 | 28.18 | 9.95  | 17.95 | 8.66 | 36.02 | 13.87 |
| SITAPUR             | UTTAR PRADESH | 5.09  | 3.52 | 31.33 | 10.22 | 16.05 | 8.15 | 38.12 | 15.03 |
| HARDOI              | UTTAR PRADESH | 6.55  | 6.83 | 32.89 | 10.79 | 15.60 | 7.68 | 45.84 | 10.80 |
| UNNAO               | UTTAR PRADESH | 8.01  | 4.77 | 35.42 | 9.69  | 16.34 | 7.61 | 47.98 | 13.73 |
| LUCKNOW             | UTTAR PRADESH | 7.53  | 3.91 | 28.33 | 7.61  | 17.15 | 6.28 | 30.56 | 10.01 |
| FARRUKHABAD         | UTTAR PRADESH | 4.37  | 2.24 | 30.38 | 11.11 | 11.56 | 7.32 | 45.42 | 14.18 |
| KANNAUJ             | UTTAR PRADESH | 5.70  | 2.42 | 38.27 | 10.42 | 12.91 | 5.54 | 60.05 | 14.06 |



|                  |               |       |      |       |       |       |       |       |       |
|------------------|---------------|-------|------|-------|-------|-------|-------|-------|-------|
| ETAWAH           | UTTAR PRADESH | 3.01  | 1.35 | 19.39 | 6.32  | 7.03  | 2.39  | 33.09 | 12.87 |
| AURAIYA          | UTTAR PRADESH | 4.64  | 2.54 | 18.12 | 5.81  | 9.63  | 4.08  | 50.10 | 14.12 |
| KANPUR DEHAT     | UTTAR PRADESH | 13.44 | 7.99 | 39.82 | 10.97 | 20.72 | 9.80  | 60.23 | 13.96 |
| KANPUR NAGAR     | UTTAR PRADESH | 8.08  | 4.06 | 26.33 | 6.75  | 16.53 | 5.68  | 42.01 | 13.82 |
| JALAUN           | UTTAR PRADESH | 8.55  | 5.37 | 32.29 | 8.37  | 17.25 | 7.45  | 41.97 | 12.33 |
| JHANSI           | UTTAR PRADESH | 8.23  | 7.19 | 48.73 | 10.59 | 18.80 | 8.65  | 51.16 | 14.80 |
| LALITPUR         | UTTAR PRADESH | 6.49  | 3.33 | 27.21 | 7.90  | 14.32 | 5.33  | 53.96 | 13.43 |
| HAMIRPUR         | UTTAR PRADESH | 3.59  | 1.47 | 20.99 | 5.17  | 7.20  | 2.78  | 49.30 | 12.90 |
| MAHOBA           | UTTAR PRADESH | 8.78  | 5.47 | 25.18 | 7.31  | 17.00 | 7.14  | 44.26 | 13.54 |
| BANDA            | UTTAR PRADESH | 5.87  | 3.83 | 34.02 | 10.23 | 15.91 | 6.97  | 53.02 | 11.55 |
| CHITRAKOOT       | UTTAR PRADESH | 9.69  | 5.77 | 32.47 | 8.80  | 14.84 | 6.06  | 54.73 | 13.72 |
| FATEHPUR         | UTTAR PRADESH | 7.60  | 4.77 | 38.08 | 10.65 | 20.06 | 9.72  | 38.33 | 15.09 |
| PRATAPGARH       | UTTAR PRADESH | 5.92  | 3.71 | 23.59 | 6.50  | 10.38 | 4.58  | 38.86 | 14.74 |
| KAUSHAMBI        | UTTAR PRADESH | 8.46  | 5.30 | 32.53 | 9.35  | 17.61 | 8.61  | 42.99 | 13.42 |
| ALLAHABAD        | UTTAR PRADESH | 7.47  | 4.04 | 36.39 | 10.76 | 20.59 | 9.23  | 49.37 | 14.22 |
| BARA BANKI       | UTTAR PRADESH | 5.85  | 3.90 | 31.93 | 8.55  | 17.08 | 7.31  | 35.06 | 11.26 |
| FAIZABAD         | UTTAR PRADESH | 7.15  | 3.60 | 29.88 | 7.25  | 14.21 | 5.00  | 53.82 | 15.08 |
| AMBEDKAR NAGAR   | UTTAR PRADESH | 6.50  | 5.39 | 22.54 | 7.52  | 13.09 | 6.42  | 36.27 | 11.64 |
| BAHRAICH         | UTTAR PRADESH | 10.53 | 7.63 | 46.44 | 12.36 | 25.28 | 12.21 | 60.34 | 14.30 |
| SHRAWASTI        | UTTAR PRADESH | 5.45  | 3.30 | 38.06 | 10.11 | 18.03 | 7.41  | 44.37 | 15.82 |
| BALRAMPUR        | UTTAR PRADESH | 12.77 | 8.26 | 39.07 | 9.71  | 20.51 | 9.09  | 49.01 | 13.06 |
| GONDA            | UTTAR PRADESH | 7.30  | 4.97 | 37.04 | 11.55 | 23.04 | 9.69  | 48.06 | 14.42 |
| SIDDHARTHANAGAR  | UTTAR PRADESH | 5.57  | 3.38 | 33.04 | 9.12  | 11.27 | 4.76  | 31.18 | 12.41 |
| BASTI            | UTTAR PRADESH | 7.28  | 3.92 | 23.66 | 6.90  | 12.03 | 4.17  | 45.35 | 14.40 |
| SANT KABIR NAGAR | UTTAR PRADESH | 4.62  | 4.68 | 21.06 | 10.13 | 5.73  | 4.00  | 36.50 | 14.39 |
| MAHRAJGANJ       | UTTAR PRADESH | 2.42  | 0.71 | 22.18 | 7.83  | 7.71  | 4.04  | 39.12 | 11.39 |
| GORAKHPUR        | UTTAR PRADESH | 2.90  | 1.15 | 28.97 | 8.49  | 11.94 | 5.76  | 43.46 | 14.92 |
| KUSHINAGAR       | UTTAR PRADESH | 4.94  | 3.25 | 30.73 | 8.62  | 9.87  | 5.06  | 40.18 | 13.44 |
| DEORIA           | UTTAR PRADESH | 7.61  | 6.46 | 31.19 | 8.81  | 16.01 | 8.41  | 48.59 | 14.49 |
| AZAMGARH         | UTTAR PRADESH | 7.30  | 6.48 | 33.03 | 9.71  | 15.45 | 8.87  | 50.08 | 13.29 |
| MAU              | UTTAR PRADESH | 5.90  | 2.91 | 37.33 | 11.24 | 18.79 | 8.46  | 49.91 | 13.42 |
| BALLIA           | UTTAR PRADESH | 6.04  | 4.63 | 32.90 | 9.49  | 13.50 | 6.84  | 47.27 | 13.25 |
| JAUNPUR          | UTTAR PRADESH | 5.23  | 4.83 | 23.40 | 7.14  | 14.35 | 7.02  | 41.65 | 13.86 |
| GHAZIPUR         | UTTAR PRADESH | 5.68  | 4.54 | 33.58 | 10.90 | 17.16 | 7.89  | 42.95 | 13.44 |
| CHANDAULI        | UTTAR PRADESH | 7.16  | 3.71 | 23.96 | 6.64  | 13.80 | 5.15  | 49.03 | 12.12 |
| VARANASI         | UTTAR PRADESH | 4.52  | 2.28 | 19.55 | 4.61  | 8.77  | 3.28  | 50.10 | 13.97 |

|                              |               |      |      |       |       |       |      |       |       |
|------------------------------|---------------|------|------|-------|-------|-------|------|-------|-------|
| SANT RAVIDAS NAGAR (BHADOHI) | UTTAR PRADESH | 8.97 | 5.33 | 34.25 | 9.49  | 16.85 | 8.53 | 58.26 | 15.03 |
| MIRZAPUR                     | UTTAR PRADESH | 7.68 | 4.78 | 31.09 | 8.83  | 15.91 | 6.04 | 34.85 | 13.62 |
| SONBHADRA                    | UTTAR PRADESH | 4.22 | 2.07 | 26.09 | 8.44  | 15.55 | 7.56 | 41.47 | 12.68 |
| ETAH                         | UTTAR PRADESH | 5.76 | 3.02 | 40.73 | 10.02 | 10.20 | 5.06 | 54.00 | 12.60 |
| KANSHIRAM NAGAR              | UTTAR PRADESH | 4.79 | 3.00 | 29.51 | 9.66  | 10.60 | 4.80 | 42.13 | 12.28 |
| PASHCHIM CHAMPARAN           | BIHAR         | 6.46 | 5.05 | 32.75 | 9.18  | 15.16 | 7.53 | 47.14 | 12.17 |
| PURBA CHAMPARAN              | BIHAR         | 6.46 | 4.99 | 29.65 | 9.20  | 18.57 | 8.33 | 47.29 | 13.75 |
| SHEOHAR                      | BIHAR         | 4.26 | 2.31 | 31.99 | 9.93  | 13.68 | 5.18 | 45.46 | 13.63 |
| SITAMARHI                    | BIHAR         | 6.33 | 4.41 | 29.10 | 9.13  | 17.28 | 7.34 | 43.59 | 14.59 |
| MADHUBANI                    | BIHAR         | 2.94 | 1.37 | 23.15 | 6.27  | 7.23  | 3.03 | 36.03 | 10.81 |
| SUPAUL                       | BIHAR         | 4.44 | 3.84 | 24.60 | 8.69  | 11.52 | 5.74 | 36.96 | 12.97 |
| ARARIA                       | BIHAR         | 6.03 | 6.54 | 34.13 | 11.80 | 13.56 | 8.74 | 50.55 | 14.32 |
| KISHANGANJ                   | BIHAR         | 5.61 | 3.56 | 30.59 | 10.07 | 14.21 | 6.47 | 53.03 | 12.84 |
| PURNIA                       | BIHAR         | 6.38 | 5.57 | 33.74 | 10.09 | 15.05 | 6.65 | 58.70 | 14.04 |
| KATI HAR                     | BIHAR         | 4.53 | 3.63 | 23.78 | 7.61  | 12.46 | 5.72 | 51.53 | 14.86 |
| MADHEPURA                    | BIHAR         | 3.60 | 2.39 | 22.45 | 6.88  | 9.82  | 4.47 | 47.04 | 13.51 |
| SAHARSA                      | BIHAR         | 3.48 | 2.25 | 25.86 | 9.11  | 10.66 | 5.19 | 42.00 | 13.28 |
| DARBHANGA                    | BIHAR         | 5.97 | 3.52 | 30.08 | 7.85  | 14.09 | 6.09 | 38.27 | 12.87 |
| MUZAFFARPUR                  | BIHAR         | 2.16 | 0.93 | 21.63 | 7.69  | 6.75  | 2.65 | 35.97 | 12.43 |
| GOPALGANJ                    | BIHAR         | 2.61 | 1.28 | 20.74 | 7.28  | 6.90  | 2.66 | 31.80 | 11.52 |
| SIWAN                        | BIHAR         | 2.87 | 1.55 | 21.88 | 8.02  | 10.71 | 5.51 | 31.55 | 11.68 |
| SARAN                        | BIHAR         | 2.95 | 1.46 | 26.57 | 8.81  | 9.79  | 3.61 | 56.33 | 14.84 |
| VAISHALI                     | BIHAR         | 2.70 | 1.32 | 25.78 | 7.57  | 13.85 | 6.17 | 70.76 | 10.48 |
| SAMASTIPUR                   | BIHAR         | 1.72 | 0.57 | 24.46 | 7.37  | 8.34  | 3.82 | 40.12 | 13.07 |
| BEGUSARAI                    | BIHAR         | 3.56 | 2.00 | 32.06 | 10.67 | 14.96 | 6.36 | 54.38 | 17.56 |
| KHAGARIA                     | BIHAR         | 2.76 | 1.80 | 32.83 | 9.21  | 13.32 | 6.04 | 48.85 | 12.66 |
| BHAGALPUR                    | BIHAR         | 2.72 | 1.38 | 26.31 | 9.84  | 7.62  | 4.05 | 30.32 | 12.85 |
| BANKA                        | BIHAR         | 3.30 | 1.66 | 12.70 | 3.49  | 5.31  | 1.69 | 29.86 | 12.87 |
| MUNGER                       | BIHAR         | 5.73 | 3.39 | 23.81 | 7.81  | 11.06 | 5.43 | 31.74 | 12.57 |
| LAKHISARAI                   | BIHAR         | 4.32 | 2.20 | 28.85 | 10.05 | 13.30 | 6.47 | 41.86 | 13.76 |
| SHEIKHPURA                   | BIHAR         | 2.24 | 0.94 | 17.20 | 6.02  | 9.22  | 4.44 | 42.34 | 14.69 |
| NALANDA                      | BIHAR         | 3.74 | 2.48 | 21.28 | 8.10  | 11.69 | 7.34 | 39.60 | 13.30 |
| PATNA                        | BIHAR         | 2.96 | 1.39 | 38.47 | 10.25 | 15.59 | 7.31 | 60.76 | 12.45 |
| BHOJPUR                      | BIHAR         | 3.73 | 2.05 | 28.73 | 10.07 | 9.56  | 3.50 | 51.68 | 12.64 |
| BUXAR                        | BIHAR         | 2.46 | 1.04 | 25.17 | 8.55  | 8.56  | 3.34 | 34.86 | 13.62 |

|                     |                   |       |       |       |       |       |       |       |       |
|---------------------|-------------------|-------|-------|-------|-------|-------|-------|-------|-------|
| KAIMUR (BHABUA)     | BIHAR             | 2.78  | 1.30  | 12.25 | 3.91  | 6.26  | 2.65  | 24.92 | 11.86 |
| ROHTAS              | BIHAR             | 2.19  | 1.91  | 12.75 | 4.62  | 4.17  | 2.03  | 27.20 | 9.42  |
| AURANGABAD          | BIHAR             | 1.36  | 0.07  | 11.65 | 3.89  | 4.15  | 1.73  | 22.26 | 9.56  |
| GAYA                | BIHAR             | 1.98  | 0.68  | 14.76 | 6.59  | 6.23  | 3.32  | 30.42 | 12.45 |
| NAWADA              | BIHAR             | 3.67  | 1.93  | 21.49 | 7.37  | 8.76  | 4.74  | 39.43 | 12.14 |
| JAMUI               | BIHAR             | 3.67  | 2.55  | 27.87 | 9.23  | 11.56 | 5.04  | 39.23 | 15.32 |
| JEHANABAD           | BIHAR             | 2.07  | 0.79  | 26.56 | 8.66  | 4.35  | 1.50  | 41.56 | 12.20 |
| ARWAL               | BIHAR             | 2.66  | 1.19  | 15.22 | 4.37  | 5.35  | 1.89  | 28.84 | 12.12 |
| NORTH DISTRICT      | SIKKIM            | 1.78  | 0.08  | 8.46  | 2.32  | 4.33  | 1.33  | 59.12 | 11.64 |
| WEST DISTRICT       | SIKKIM            | 2.19  | 0.66  | 7.40  | 2.05  | 3.92  | 0.76  | 32.48 | 9.78  |
| SOUTH DISTRICT      | SIKKIM            | 4.14  | 2.23  | 12.37 | 3.59  | 8.58  | 3.44  | 50.01 | 11.95 |
| EAST DISTRICT       | SIKKIM            | 2.51  | 1.12  | 19.42 | 6.63  | 7.30  | 4.45  | 67.09 | 10.73 |
| TAWANG              | ARUNACHAL PRADESH | 5.30  | 2.31  | 31.60 | 8.23  | 9.35  | 3.18  | 54.35 | 13.57 |
| WEST KAMENG         | ARUNACHAL PRADESH | 11.28 | 7.13  | 35.82 | 9.62  | 23.10 | 9.23  | 75.88 | 8.13  |
| EAST KAMENG         | ARUNACHAL PRADESH | 11.70 | 8.59  | 36.60 | 11.86 | 18.99 | 10.52 | 58.59 | 14.55 |
| PAPUM PARE          | ARUNACHAL PRADESH | 8.31  | 5.25  | 34.18 | 9.44  | 13.81 | 5.83  | 51.05 | 12.68 |
| UPPER SUBANSIRI     | ARUNACHAL PRADESH | 9.21  | 5.83  | 30.49 | 9.97  | 12.59 | 5.52  | 50.41 | 14.12 |
| UPPER SIANG         | ARUNACHAL PRADESH | 8.41  | 4.57  | 33.86 | 7.58  | 21.22 | 7.27  | 51.72 | 16.22 |
| CHANGLANG           | ARUNACHAL PRADESH | 9.47  | 7.31  | 24.48 | 7.88  | 12.35 | 6.81  | 39.04 | 11.54 |
| LOWER SUBANSIRI     | ARUNACHAL PRADESH | 6.73  | 5.46  | 28.41 | 7.37  | 15.99 | 7.07  | 32.17 | 11.72 |
| DIBANG VALLEY       | ARUNACHAL PRADESH | 4.55  | 1.61  | 14.66 | 2.75  | 9.39  | 2.56  | 35.41 | 10.68 |
| LOWER DIBANG VALLEY | ARUNACHAL PRADESH | 3.73  | 1.37  | 21.35 | 5.51  | 10.83 | 4.30  | 31.04 | 10.40 |
| ANJAW               | ARUNACHAL PRADESH | 4.13  | 1.58  | 11.39 | 2.40  | 6.14  | 1.57  | 34.67 | 9.30  |
| MON                 | NAGALAND          | 6.20  | 2.86  | 36.98 | 8.47  | 15.94 | 5.87  | 49.20 | 14.98 |
| MOKOKCHUNG          | NAGALAND          | 4.47  | 0.21  | 17.54 | 3.21  | 7.95  | 0.34  | 46.13 | 10.48 |
| ZUNHEBOTO           | NAGALAND          | 12.93 | 7.31  | 43.87 | 10.92 | 22.82 | 8.24  | 51.77 | 15.36 |
| WOKHA               | NAGALAND          | 15.05 | 8.55  | 50.73 | 10.10 | 26.91 | 9.33  | 59.93 | 12.60 |
| DIMAPUR             | NAGALAND          | 12.90 | 8.16  | 45.64 | 11.01 | 24.67 | 9.63  | 72.81 | 9.96  |
| PHEK                | NAGALAND          | 7.20  | 3.05  | 40.95 | 10.41 | 21.66 | 9.13  | 52.20 | 13.07 |
| TUENSANG            | NAGALAND          | 22.16 | 13.54 | 57.37 | 12.32 | 42.79 | 15.57 | 69.42 | 11.92 |
| LONGLENG            | NAGALAND          | 14.79 | 12.01 | 45.32 | 12.15 | 24.12 | 10.84 | 55.15 | 13.63 |

|                  |           |       |       |       |       |       |       |       |       |
|------------------|-----------|-------|-------|-------|-------|-------|-------|-------|-------|
| KIPHIRE          | NAGALAND  | 13.88 | 8.70  | 54.73 | 10.58 | 29.64 | 10.51 | 76.83 | 9.31  |
| KOHIMA           | NAGALAND  | 5.35  | 1.95  | 24.97 | 6.38  | 13.63 | 4.86  | 47.69 | 13.16 |
| PEREN            | NAGALAND  | 9.21  | 4.63  | 35.85 | 9.69  | 19.67 | 8.01  | 70.22 | 11.36 |
| SENAPATI         | MANIPUR   | 6.74  | 5.20  | 33.54 | 10.63 | 21.19 | 9.83  | 81.91 | 9.29  |
| TAMENGLONG       | MANIPUR   | 7.58  | 4.18  | 34.98 | 10.77 | 24.11 | 9.94  | 85.92 | 6.41  |
| CHURACHANDPUR    | MANIPUR   | 10.60 | 7.51  | 37.26 | 10.93 | 28.13 | 11.92 | 73.81 | 12.67 |
| BISHNUPUR        | MANIPUR   | 5.48  | 2.70  | 31.56 | 10.90 | 24.86 | 11.70 | 80.78 | 7.16  |
| THOUBAL          | MANIPUR   | 3.79  | 2.71  | 24.43 | 7.24  | 19.19 | 7.42  | 70.18 | 11.92 |
| IMPHAL WEST      | MANIPUR   | 3.78  | 1.79  | 25.92 | 7.07  | 11.86 | 4.25  | 81.86 | 7.29  |
| IMPHAL EAST      | MANIPUR   | 3.51  | 1.61  | 25.47 | 8.54  | 17.78 | 7.88  | 72.76 | 9.86  |
| UKHRUL           | MANIPUR   | 9.36  | 6.48  | 51.76 | 11.91 | 38.73 | 13.96 | 84.42 | 9.11  |
| CHANDEL          | MANIPUR   | 4.05  | 1.96  | 40.88 | 10.40 | 32.15 | 11.11 | 80.87 | 9.29  |
| MAMIT            | MIZORAM   | 2.96  | 0.17  | 13.78 | 5.83  | 6.51  | 3.11  | 54.25 | 15.49 |
| KOLASIB          | MIZORAM   | 6.20  | 2.71  | 17.70 | 5.20  | 12.84 | 4.96  | 40.36 | 13.85 |
| AIZAWL           | MIZORAM   | 10.14 | 5.94  | 26.47 | 9.70  | 17.16 | 9.56  | 52.05 | 11.44 |
| CHAMPHAI         | MIZORAM   | 5.07  | 2.33  | 14.97 | 5.44  | 8.36  | 3.08  | 35.22 | 12.48 |
| SERCHHIP         | MIZORAM   | 7.62  | 5.03  | 14.96 | 5.75  | 11.83 | 6.33  | 58.70 | 16.30 |
| LUNGLEI          | MIZORAM   | 7.77  | 4.25  | 22.41 | 6.24  | 12.04 | 4.95  | 56.58 | 13.31 |
| LAWNGTLAI        | MIZORAM   | 14.39 | 12.92 | 25.38 | 10.76 | 17.52 | 11.60 | 55.99 | 14.55 |
| SAIHA            | MIZORAM   | 21.77 | 12.53 | 34.11 | 11.03 | 28.17 | 11.16 | 61.49 | 13.63 |
| DHALAI           | TRIPURA   | 3.35  | 1.87  | 24.26 | 8.71  | 7.74  | 3.18  | 49.84 | 14.54 |
| SOUTH GARO HILLS | MEGHALAYA | 3.56  | 0.26  | 16.00 | 5.14  | 11.44 | 4.52  | 77.45 | 9.57  |
| RIBHOI           | MEGHALAYA | 8.86  | 5.40  | 23.60 | 8.18  | 18.70 | 9.00  | 84.83 | 7.56  |
| EAST KHASI HILLS | MEGHALAYA | 17.05 | 7.47  | 44.37 | 8.22  | 36.21 | 9.65  | 77.15 | 10.05 |
| KOKRAJHAR        | ASSAM     | 7.36  | 3.72  | 45.03 | 9.56  | 16.10 | 6.16  | 73.58 | 9.99  |
| GOALPARA         | ASSAM     | 4.14  | 1.81  | 28.84 | 9.06  | 8.63  | 3.51  | 63.84 | 13.84 |
| BARPETA          | ASSAM     | 4.49  | 3.16  | 43.00 | 11.71 | 13.47 | 7.09  | 75.24 | 11.83 |
| MORIGAON         | ASSAM     | 6.45  | 4.65  | 26.20 | 8.44  | 11.36 | 5.44  | 72.55 | 12.71 |
| LAKHIMPUR        | ASSAM     | 4.39  | 2.05  | 28.93 | 7.10  | 11.56 | 4.12  | 48.32 | 13.10 |
| DHEMAJI          | ASSAM     | 3.66  | 1.73  | 12.86 | 3.79  | 7.27  | 2.65  | 68.11 | 14.09 |
| TINSUKIA         | ASSAM     | 2.90  | 0.13  | 24.48 | 6.38  | 7.38  | 2.46  | 59.15 | 13.71 |
| DIBRUGARH        | ASSAM     | 3.55  | 1.10  | 16.49 | 3.48  | 5.75  | 1.28  | 48.89 | 15.91 |
| GOLAGHAT         | ASSAM     | 5.91  | 2.82  | 25.41 | 6.27  | 10.40 | 3.52  | 55.13 | 15.68 |
| DIMA HASAO       | ASSAM     | 8.89  | 4.42  | 34.64 | 9.95  | 22.02 | 9.48  | 65.96 | 13.46 |
| CACHAR           | ASSAM     | 8.24  | 5.09  | 27.07 | 8.50  | 17.89 | 7.70  | 76.33 | 9.21  |
| KARIMGANJ        | ASSAM     | 5.44  | 2.40  | 24.52 | 8.45  | 12.33 | 4.46  | 76.50 | 10.59 |
| HAILAKANDI       | ASSAM     | 7.45  | 3.70  | 28.71 | 8.21  | 12.04 | 4.71  | 68.55 | 12.25 |

|                            |             |      |      |       |       |       |      |       |       |
|----------------------------|-------------|------|------|-------|-------|-------|------|-------|-------|
| BONGAIGAON                 | ASSAM       | 8.73 | 5.98 | 29.63 | 10.27 | 12.05 | 5.67 | 66.88 | 13.70 |
| CHIRANG                    | ASSAM       | 5.95 | 4.67 | 26.31 | 7.76  | 8.81  | 3.45 | 69.61 | 15.95 |
| KAMRUP                     | ASSAM       | 5.84 | 3.76 | 32.43 | 8.73  | 14.21 | 7.82 | 72.16 | 11.40 |
| KAMRUP METROPOLITAN        | ASSAM       | 5.50 | 3.08 | 41.85 | 9.00  | 19.41 | 6.47 | 67.23 | 11.33 |
| NALBARI                    | ASSAM       | 5.67 | 3.25 | 31.51 | 8.32  | 11.52 | 4.49 | 66.00 | 10.86 |
| BAKSA                      | ASSAM       | 4.87 | 3.83 | 27.50 | 9.26  | 8.05  | 4.14 | 54.84 | 14.37 |
| DARRANG                    | ASSAM       | 6.51 | 6.61 | 39.84 | 10.33 | 14.52 | 6.09 | 73.66 | 10.55 |
| UDALGURI                   | ASSAM       | 9.56 | 6.82 | 53.99 | 8.53  | 17.22 | 7.38 | 55.53 | 12.71 |
| DARJILING                  | WEST BENGAL | 0.84 | 0.04 | 6.57  | 1.93  | 2.07  | 0.08 | 25.55 | 9.35  |
| JALPAIGURI                 | WEST BENGAL | 0.83 | 0.03 | 9.56  | 4.01  | 3.02  | 0.96 | 16.57 | 5.97  |
| KOCH BIHAR                 | WEST BENGAL | 1.41 | 0.78 | 6.67  | 2.03  | 2.94  | 1.11 | 23.65 | 10.27 |
| UTTAR DINAJPUR             | WEST BENGAL | 1.48 | 0.72 | 11.78 | 5.08  | 6.44  | 3.38 | 19.20 | 8.74  |
| DAKSHIN DINAJPUR           | WEST BENGAL | 0.82 | 0.03 | 6.93  | 2.65  | 2.87  | 1.66 | 14.32 | 5.84  |
| MALDAH                     | WEST BENGAL | 1.06 | 0.45 | 10.20 | 3.29  | 3.95  | 1.64 | 26.93 | 16.12 |
| MURSHIDABAD                | WEST BENGAL | 1.01 | 0.48 | 9.09  | 2.67  | 3.15  | 1.08 | 38.12 | 13.88 |
| BIRBHUM                    | WEST BENGAL | 1.08 | 0.42 | 14.64 | 6.49  | 2.36  | 0.67 | 22.41 | 7.61  |
| NADIA                      | WEST BENGAL | 0.89 | 0.03 | 8.81  | 2.52  | 3.55  | 1.25 | 20.78 | 8.25  |
| NORTH TWENTY FOUR PARGANAS | WEST BENGAL | 1.15 | 0.44 | 7.00  | 1.70  | 3.30  | 1.02 | 13.20 | 4.63  |
| HUGLI                      | WEST BENGAL | 0.87 | 0.03 | 5.88  | 1.32  | 2.64  | 0.71 | 30.74 | 12.78 |
| BANKURA                    | WEST BENGAL | 0.86 | 0.04 | 10.90 | 3.27  | 3.92  | 1.34 | 17.89 | 6.69  |
| PURULIYA                   | WEST BENGAL | 1.38 | 0.64 | 11.95 | 3.95  | 4.20  | 1.66 | 23.31 | 10.04 |
| HAORA                      | WEST BENGAL | 1.53 | 0.83 | 9.14  | 2.51  | 4.86  | 1.87 | 16.05 | 7.58  |
| KOLKATA                    | WEST BENGAL | 1.62 | 0.90 | 13.97 | 4.48  | 4.55  | 1.79 | 25.79 | 9.75  |
| SOUTH TWENTY FOUR PARGANAS | WEST BENGAL | 1.36 | 0.69 | 7.79  | 2.12  | 3.52  | 1.32 | 30.09 | 11.10 |
| PASCHIM MEDINIPUR          | WEST BENGAL | 1.36 | 0.72 | 15.83 | 6.29  | 5.64  | 2.88 | 18.61 | 8.30  |
| PURBA MEDINIPUR            | WEST BENGAL | 1.11 | 0.46 | 9.43  | 2.59  | 4.49  | 1.70 | 32.86 | 13.90 |
| GARHWA                     | JHARKHAND   | 3.08 | 1.27 | 19.85 | 6.81  | 10.34 | 4.20 | 33.48 | 13.32 |
| CHATRA                     | JHARKHAND   | 4.05 | 2.38 | 22.67 | 9.07  | 13.83 | 7.72 | 31.91 | 11.43 |
| KODARMA                    | JHARKHAND   | 4.34 | 2.82 | 24.00 | 8.08  | 11.29 | 4.46 | 41.94 | 15.16 |
| GIRIDIH                    | JHARKHAND   | 4.95 | 4.57 | 25.85 | 8.77  | 11.52 | 6.08 | 49.50 | 15.04 |
| DEOGHAR                    | JHARKHAND   | 8.17 | 5.76 | 39.68 | 9.91  | 19.72 | 8.49 | 62.95 | 12.36 |
| GODDA                      | JHARKHAND   | 3.90 | 1.91 | 28.42 | 9.00  | 9.21  | 4.08 | 53.17 | 15.23 |
| SAHIBGANJ                  | JHARKHAND   | 6.26 | 3.83 | 29.90 | 10.73 | 17.65 | 9.92 | 49.80 | 13.89 |
| PAKUR                      | JHARKHAND   | 4.02 | 2.09 | 26.24 | 8.73  | 10.61 | 4.74 | 28.02 | 11.01 |
| DHANBAD                    | JHARKHAND   | 5.98 | 3.83 | 28.51 | 8.09  | 10.39 | 5.84 | 43.20 | 15.46 |

|                     |           |      |      |       |       |       |      |       |       |
|---------------------|-----------|------|------|-------|-------|-------|------|-------|-------|
| BOKARO              | JHARKHAND | 3.13 | 1.39 | 23.04 | 6.74  | 6.38  | 2.35 | 27.14 | 8.97  |
| LOHARDAGA           | JHARKHAND | 2.69 | 1.09 | 11.66 | 3.72  | 4.95  | 1.43 | 18.95 | 7.85  |
| PURBI SINGHBHUM     | JHARKHAND | 3.33 | 1.62 | 12.39 | 3.52  | 6.86  | 2.44 | 31.64 | 12.53 |
| PALAMU              | JHARKHAND | 3.08 | 1.44 | 15.68 | 4.49  | 5.67  | 1.92 | 29.07 | 11.04 |
| LATEHAR             | JHARKHAND | 2.69 | 1.20 | 19.25 | 8.44  | 4.80  | 1.67 | 27.82 | 11.83 |
| HAZARIBAGH          | JHARKHAND | 3.09 | 1.53 | 27.20 | 10.35 | 10.22 | 4.51 | 35.38 | 12.33 |
| RAMGARH             | JHARKHAND | 2.26 | 0.62 | 16.83 | 5.54  | 5.21  | 1.90 | 34.47 | 12.38 |
| DUMKA               | JHARKHAND | 4.77 | 3.90 | 19.03 | 6.84  | 9.38  | 4.84 | 36.83 | 12.50 |
| JAMTARA             | JHARKHAND | 4.59 | 3.75 | 17.80 | 8.13  | 6.55  | 3.66 | 35.89 | 12.76 |
| RANCHI              | JHARKHAND | 6.94 | 5.40 | 19.34 | 7.15  | 9.36  | 5.29 | 36.14 | 11.86 |
| KHUNTI              | JHARKHAND | 4.93 | 2.81 | 27.45 | 9.45  | 10.40 | 5.32 | 45.32 | 12.85 |
| GUMLA               | JHARKHAND | 2.00 | 0.56 | 13.63 | 5.09  | 4.98  | 2.24 | 25.20 | 10.48 |
| SIMDEGA             | JHARKHAND | 3.29 | 1.70 | 20.50 | 7.18  | 7.45  | 2.88 | 45.49 | 15.10 |
| PASHCHIMI SINGHBHUM | JHARKHAND | 4.19 | 4.88 | 13.40 | 5.92  | 7.01  | 4.80 | 38.68 | 12.84 |
| SARAIKELA-KHARSAWAN | JHARKHAND | 2.14 | 0.59 | 18.99 | 6.88  | 5.31  | 3.73 | 37.64 | 12.79 |
| BARGARH             | ODISHA    | 0.86 | 0.04 | 4.15  | 1.00  | 1.75  | 0.49 | 13.64 | 5.43  |
| JHARSUGUDA          | ODISHA    | 0.91 | 0.04 | 4.10  | 0.83  | 1.54  | 0.04 | 8.48  | 3.90  |
| SAMBALPUR           | ODISHA    | 0.89 | 0.04 | 3.99  | 0.66  | 1.43  | 0.05 | 10.45 | 3.84  |
| DEBAGARH            | ODISHA    | 0.91 | 0.03 | 3.49  | 0.12  | 1.54  | 0.05 | 13.54 | 6.70  |
| SUNDARGARH          | ODISHA    | 2.92 | 3.15 | 9.69  | 4.51  | 4.17  | 2.93 | 18.72 | 9.78  |
| KENDUJHAR           | ODISHA    | 1.47 | 0.78 | 8.99  | 3.64  | 2.78  | 1.11 | 25.74 | 11.04 |
| MAYURBHANJ          | ODISHA    | 2.47 | 1.81 | 9.00  | 5.48  | 4.58  | 4.43 | 29.23 | 12.81 |
| BALESHWAR           | ODISHA    | 0.85 | 0.04 | 4.93  | 1.07  | 1.42  | 0.06 | 21.54 | 8.83  |
| BHADRAK             | ODISHA    | 1.06 | 0.37 | 10.35 | 3.21  | 1.97  | 0.57 | 19.20 | 8.20  |
| KENDRAPARA          | ODISHA    | 1.67 | 0.98 | 9.45  | 3.08  | 3.87  | 1.68 | 22.90 | 8.81  |
| JAGATSinghapur      | ODISHA    | 1.14 | 0.44 | 6.12  | 1.69  | 1.78  | 0.45 | 26.62 | 10.62 |
| CUTTACK             | ODISHA    | 1.68 | 0.95 | 6.46  | 1.96  | 2.68  | 1.08 | 27.90 | 11.28 |
| JAJAPUR             | ODISHA    | 1.10 | 0.50 | 12.87 | 4.30  | 2.16  | 0.73 | 15.31 | 8.37  |
| DHENKANAL           | ODISHA    | 0.88 | 0.03 | 7.35  | 2.67  | 1.87  | 0.45 | 18.63 | 8.21  |
| ANUGUL              | ODISHA    | 1.11 | 0.52 | 8.10  | 2.91  | 2.11  | 0.74 | 18.66 | 9.00  |
| NAYAGARH            | ODISHA    | 1.16 | 0.49 | 4.46  | 0.97  | 1.76  | 0.49 | 15.52 | 7.09  |
| KHORDHA             | ODISHA    | 1.15 | 0.41 | 8.10  | 2.33  | 2.24  | 0.70 | 9.99  | 3.43  |
| PURI                | ODISHA    | 0.88 | 0.03 | 4.33  | 0.97  | 1.38  | 0.05 | 9.63  | 3.08  |
| GANJAM              | ODISHA    | 1.45 | 0.78 | 8.16  | 3.50  | 3.45  | 1.48 | 16.07 | 9.82  |
| GAJAPATI            | ODISHA    | 1.39 | 0.67 | 5.51  | 1.35  | 2.57  | 0.94 | 18.65 | 7.87  |
| KANDHAMAL           | ODISHA    | 0.80 | 0.03 | 3.52  | 0.73  | 1.27  | 0.05 | 17.18 | 11.83 |

|                        |                |      |      |       |       |       |      |       |       |
|------------------------|----------------|------|------|-------|-------|-------|------|-------|-------|
| BAUDH                  | ODISHA         | 1.10 | 0.49 | 5.59  | 1.59  | 2.12  | 0.74 | 18.27 | 8.44  |
| SUBARNAPUR             | ODISHA         | 0.86 | 0.03 | 3.71  | 0.53  | 1.40  | 0.05 | 10.62 | 4.13  |
| BALANGIR               | ODISHA         | 1.14 | 0.41 | 4.32  | 0.90  | 1.78  | 0.42 | 9.19  | 3.76  |
| NUAPADA                | ODISHA         | 1.07 | 0.37 | 3.95  | 0.81  | 1.33  | 0.04 | 14.94 | 6.03  |
| KALAHANDI              | ODISHA         | 0.88 | 0.04 | 6.17  | 1.59  | 1.81  | 0.44 | 11.04 | 5.33  |
| RAYAGADA               | ODISHA         | 2.03 | 3.31 | 5.67  | 3.19  | 3.19  | 3.00 | 13.35 | 5.01  |
| NABARANGAPUR           | ODISHA         | 1.00 | 0.34 | 4.35  | 1.07  | 1.81  | 0.49 | 17.73 | 6.95  |
| KORAPUT                | ODISHA         | 0.85 | 0.03 | 3.56  | 0.64  | 1.36  | 0.05 | 9.81  | 5.49  |
| MALKANGIRI             | ODISHA         | 0.78 | 0.03 | 4.54  | 1.14  | 1.84  | 0.54 | 16.15 | 6.44  |
| KORIYA                 | CHHATTISGARH   | 2.39 | 1.21 | 12.04 | 4.15  | 6.43  | 3.34 | 46.86 | 14.47 |
| JASHPUR                | CHHATTISGARH   | 1.89 | 0.68 | 7.90  | 4.18  | 4.01  | 1.13 | 32.55 | 12.68 |
| RAIGARH                | CHHATTISGARH   | 1.64 | 0.06 | 9.47  | 3.47  | 4.48  | 1.24 | 50.50 | 14.74 |
| KORBA                  | CHHATTISGARH   | 5.25 | 2.86 | 24.14 | 6.60  | 10.09 | 4.08 | 54.64 | 12.52 |
| JANJGIR - CHAMPA       | CHHATTISGARH   | 2.53 | 1.34 | 13.16 | 3.89  | 5.96  | 2.45 | 35.82 | 11.43 |
| KABEERDHAM             | CHHATTISGARH   | 1.53 | 0.06 | 7.38  | 1.70  | 4.05  | 1.01 | 40.09 | 12.84 |
| RAJNANDGAON            | CHHATTISGARH   | 1.98 | 0.73 | 9.55  | 2.29  | 4.82  | 1.46 | 24.33 | 8.16  |
| MAHASAMUND             | CHHATTISGARH   | 2.78 | 1.37 | 15.12 | 4.12  | 6.21  | 2.28 | 39.19 | 13.07 |
| DHAMTARI               | CHHATTISGARH   | 2.71 | 2.83 | 15.49 | 6.44  | 4.62  | 1.35 | 29.18 | 9.76  |
| UTTAR BASTAR<br>KANKER | CHHATTISGARH   | 3.47 | 1.72 | 10.87 | 2.51  | 6.08  | 1.96 | 34.68 | 12.81 |
| NARAYANPUR             | CHHATTISGARH   | 1.91 | 0.61 | 13.94 | 6.27  | 7.75  | 3.74 | 37.03 | 12.72 |
| BIJAPUR                | CHHATTISGARH   | 7.46 | 6.49 | 19.53 | 8.03  | 11.48 | 5.74 | 37.58 | 15.03 |
| SHEOPUR                | MADHYA PRADESH | 5.29 | 6.05 | 28.71 | 9.44  | 17.30 | 8.62 | 40.26 | 13.52 |
| MORENA                 | MADHYA PRADESH | 5.05 | 3.42 | 26.76 | 9.72  | 12.53 | 6.80 | 36.04 | 14.40 |
| BHIND                  | MADHYA PRADESH | 3.87 | 2.84 | 25.34 | 7.92  | 8.02  | 4.39 | 43.03 | 12.78 |
| GWALIOR                | MADHYA PRADESH | 6.79 | 5.65 | 16.88 | 6.25  | 12.71 | 6.56 | 35.91 | 11.54 |
| DATIA                  | MADHYA PRADESH | 3.75 | 2.64 | 18.22 | 5.90  | 8.95  | 3.18 | 42.40 | 12.88 |
| SHIVPURI               | MADHYA PRADESH | 6.16 | 3.54 | 31.52 | 8.89  | 15.07 | 6.53 | 45.71 | 11.40 |
| TIKAMGARH              | MADHYA PRADESH | 2.90 | 1.36 | 19.24 | 5.32  | 9.47  | 4.10 | 42.18 | 10.36 |
| CHHATARPUR             | MADHYA PRADESH | 2.14 | 0.56 | 23.50 | 7.69  | 9.14  | 4.94 | 41.64 | 14.68 |
| PANNA                  | MADHYA PRADESH | 6.10 | 4.73 | 29.38 | 10.12 | 16.15 | 6.11 | 37.70 | 13.79 |
| SAGAR                  | MADHYA PRADESH | 2.72 | 2.00 | 19.77 | 7.38  | 9.54  | 4.68 | 40.59 | 12.80 |
| DAMOH                  | MADHYA PRADESH | 5.04 | 3.71 | 32.12 | 10.85 | 14.80 | 6.32 | 35.91 | 12.50 |
| SATNA                  | MADHYA PRADESH | 2.51 | 1.20 | 19.96 | 7.01  | 8.43  | 3.15 | 36.91 | 12.07 |
| REWA                   | MADHYA PRADESH | 3.61 | 2.17 | 25.77 | 8.02  | 6.25  | 2.35 | 47.89 | 12.70 |
| UMARIA                 | MADHYA PRADESH | 2.47 | 0.98 | 10.82 | 4.32  | 5.70  | 2.47 | 54.37 | 13.56 |
| NEEMUCH                | MADHYA PRADESH | 3.40 | 1.84 | 11.24 | 3.66  | 6.95  | 3.31 | 25.86 | 10.23 |
| MANDSAUR               | MADHYA PRADESH | 5.17 | 2.90 | 21.13 | 6.64  | 9.18  | 3.65 | 30.72 | 10.24 |

|                       |                |       |      |       |       |       |       |       |       |
|-----------------------|----------------|-------|------|-------|-------|-------|-------|-------|-------|
| RATLAM                | MADHYA PRADESH | 2.81  | 1.29 | 8.69  | 3.41  | 5.42  | 3.09  | 18.84 | 8.33  |
| UJJAIN                | MADHYA PRADESH | 2.15  | 0.76 | 8.26  | 1.96  | 5.10  | 1.52  | 25.74 | 7.77  |
| DEWAS                 | MADHYA PRADESH | 2.12  | 0.73 | 12.76 | 4.02  | 4.36  | 1.19  | 25.38 | 11.00 |
| DHAR                  | MADHYA PRADESH | 2.91  | 1.25 | 18.31 | 4.74  | 8.71  | 3.44  | 49.45 | 9.77  |
| INDORE                | MADHYA PRADESH | 2.47  | 1.11 | 14.63 | 6.45  | 7.72  | 4.08  | 28.49 | 10.15 |
| KHARGONE (WEST NIMAR) | MADHYA PRADESH | 3.17  | 1.68 | 19.39 | 6.08  | 8.45  | 3.34  | 33.64 | 11.60 |
| BARWANI               | MADHYA PRADESH | 5.97  | 6.75 | 19.27 | 7.42  | 10.24 | 6.10  | 31.26 | 14.32 |
| RAJGARH               | MADHYA PRADESH | 4.46  | 3.44 | 23.96 | 8.04  | 9.72  | 4.36  | 39.35 | 13.59 |
| VIDISHA               | MADHYA PRADESH | 4.88  | 4.09 | 17.40 | 6.19  | 9.99  | 4.53  | 23.04 | 9.70  |
| BHOPAL                | MADHYA PRADESH | 2.30  | 0.20 | 33.39 | 9.39  | 15.88 | 6.59  | 33.82 | 9.57  |
| SEHORE                | MADHYA PRADESH | 4.08  | 3.32 | 32.28 | 9.93  | 13.83 | 6.05  | 31.96 | 12.02 |
| RAISEN                | MADHYA PRADESH | 3.26  | 1.91 | 20.38 | 7.22  | 9.81  | 4.02  | 31.94 | 12.96 |
| BETUL                 | MADHYA PRADESH | 3.22  | 1.61 | 16.10 | 4.60  | 7.11  | 2.60  | 27.35 | 10.04 |
| HARDA                 | MADHYA PRADESH | 1.77  | 0.08 | 10.26 | 2.85  | 4.71  | 1.26  | 18.22 | 7.62  |
| HOSHANGABAD           | MADHYA PRADESH | 2.73  | 1.39 | 22.81 | 7.15  | 8.66  | 3.38  | 27.20 | 9.12  |
| KATNI                 | MADHYA PRADESH | 2.53  | 0.83 | 15.03 | 5.41  | 4.79  | 1.05  | 21.25 | 8.78  |
| JABALPUR              | MADHYA PRADESH | 3.86  | 1.89 | 17.24 | 4.77  | 7.60  | 2.67  | 28.31 | 10.51 |
| NARSIMHAPUR           | MADHYA PRADESH | 5.52  | 5.69 | 15.59 | 6.06  | 9.45  | 5.53  | 33.18 | 12.14 |
| DINDORI               | MADHYA PRADESH | 3.96  | 2.19 | 17.45 | 5.31  | 10.45 | 4.35  | 39.36 | 12.88 |
| MANDLA                | MADHYA PRADESH | 2.41  | 0.95 | 10.77 | 2.83  | 5.67  | 1.88  | 27.15 | 12.18 |
| CHHINDWARA            | MADHYA PRADESH | 3.22  | 1.73 | 23.99 | 8.56  | 9.91  | 6.07  | 35.61 | 11.41 |
| SEONI                 | MADHYA PRADESH | 2.13  | 0.61 | 11.08 | 3.62  | 5.66  | 2.11  | 25.05 | 8.54  |
| BALAGHAT              | MADHYA PRADESH | 3.09  | 1.55 | 18.35 | 5.66  | 5.55  | 1.74  | 25.95 | 11.63 |
| GUNA                  | MADHYA PRADESH | 4.74  | 3.42 | 18.33 | 5.72  | 9.80  | 4.13  | 22.11 | 10.08 |
| ASHOKNAGAR            | MADHYA PRADESH | 2.30  | 0.78 | 24.82 | 6.57  | 13.23 | 4.53  | 38.42 | 12.20 |
| SHAHDOL               | MADHYA PRADESH | 2.50  | 1.53 | 13.07 | 4.07  | 5.93  | 2.51  | 20.36 | 7.36  |
| ANUPPUR               | MADHYA PRADESH | 3.72  | 2.76 | 12.03 | 3.53  | 7.94  | 3.55  | 19.81 | 7.33  |
| SIDHI                 | MADHYA PRADESH | 2.48  | 1.15 | 19.40 | 7.48  | 6.98  | 3.59  | 29.27 | 11.72 |
| SINGRAULI             | MADHYA PRADESH | 5.81  | 4.67 | 19.75 | 6.50  | 14.84 | 7.00  | 54.42 | 12.57 |
| JHABUA                | MADHYA PRADESH | 3.00  | 2.16 | 10.76 | 3.37  | 5.68  | 2.34  | 18.39 | 9.32  |
| ALIRAJPUR             | MADHYA PRADESH | 2.91  | 1.95 | 13.84 | 4.41  | 8.82  | 3.30  | 35.10 | 15.53 |
| KHANDWA (EAST NIMAR)  | MADHYA PRADESH | 2.92  | 1.38 | 13.94 | 4.12  | 6.68  | 2.66  | 22.43 | 9.91  |
| BURHANPUR             | MADHYA PRADESH | 3.07  | 1.69 | 10.04 | 3.85  | 6.59  | 3.63  | 31.54 | 14.03 |
| KACHCHH               | GUJARAT        | 3.54  | 1.60 | 24.02 | 8.03  | 9.46  | 4.97  | 47.08 | 13.63 |
| BANAS KANTHA          | GUJARAT        | 12.12 | 6.26 | 51.39 | 11.91 | 29.94 | 10.56 | 73.65 | 9.39  |
| PATAN                 | GUJARAT        | 2.74  | 1.16 | 16.53 | 5.75  | 4.97  | 1.50  | 31.66 | 12.71 |



|                         |               |      |      |       |       |       |       |       |       |
|-------------------------|---------------|------|------|-------|-------|-------|-------|-------|-------|
| MAHESANA                | GUJARAT       | 6.86 | 3.83 | 19.92 | 5.45  | 11.47 | 4.27  | 55.28 | 13.34 |
| GANDHINAGAR             | GUJARAT       | 5.07 | 2.66 | 18.29 | 4.66  | 7.74  | 2.84  | 46.13 | 11.03 |
| PORBANDAR               | GUJARAT       | 3.02 | 1.25 | 15.29 | 4.45  | 5.16  | 1.42  | 37.00 | 10.54 |
| AMRELI                  | GUJARAT       | 2.63 | 0.74 | 32.42 | 8.86  | 13.76 | 5.40  | 44.14 | 13.34 |
| ANAND                   | GUJARAT       | 2.61 | 0.98 | 17.57 | 4.78  | 6.94  | 2.20  | 61.25 | 14.97 |
| DOHAD                   | GUJARAT       | 7.62 | 6.01 | 29.23 | 10.39 | 18.88 | 9.67  | 62.12 | 16.11 |
| NARMADA                 | GUJARAT       | 5.75 | 2.87 | 15.20 | 5.76  | 10.49 | 5.88  | 42.64 | 13.81 |
| BHARUCH                 | GUJARAT       | 4.43 | 2.38 | 18.15 | 5.04  | 9.49  | 3.53  | 62.36 | 12.68 |
| THE DANGS               | GUJARAT       | 3.67 | 2.85 | 10.19 | 3.46  | 7.35  | 3.50  | 38.77 | 13.43 |
| NAVSARI                 | GUJARAT       | 2.55 | 0.92 | 8.61  | 2.22  | 6.09  | 2.19  | 31.04 | 10.52 |
| VALSAD                  | GUJARAT       | 3.77 | 2.00 | 11.32 | 4.32  | 6.67  | 3.80  | 30.66 | 13.18 |
| SURAT                   | GUJARAT       | 2.18 | 0.10 | 9.86  | 2.03  | 5.58  | 1.47  | 34.39 | 12.80 |
| TAPI                    | GUJARAT       | 2.21 | 0.10 | 7.43  | 1.01  | 3.94  | 0.22  | 45.74 | 12.83 |
| DIU                     | DNH & D & DIU | 1.38 | 0.06 | 5.67  | 2.14  | 2.34  | 0.08  | 19.99 | 8.35  |
| DAMAN                   | DNH & D & DIU | 3.36 | 1.80 | 13.91 | 5.14  | 8.20  | 4.07  | 38.98 | 10.47 |
| DADRA & NAGAR<br>HAVELI | DNH & D & DIU | 1.18 | 0.05 | 3.20  | 0.14  | 1.94  | 0.07  | 10.78 | 5.75  |
| NANDURBAR               | MAHARASHTRA   | 3.39 | 2.12 | 21.91 | 8.34  | 9.03  | 5.05  | 70.17 | 12.90 |
| DHULE                   | MAHARASHTRA   | 9.07 | 6.47 | 38.25 | 10.51 | 25.74 | 11.77 | 64.16 | 12.32 |
| JALGAON                 | MAHARASHTRA   | 6.84 | 4.52 | 30.08 | 8.47  | 16.04 | 6.48  | 68.61 | 11.21 |
| BULDANA                 | MAHARASHTRA   | 2.33 | 0.72 | 14.16 | 6.25  | 8.27  | 3.34  | 36.05 | 11.99 |
| AKOLA                   | MAHARASHTRA   | 5.21 | 2.80 | 25.96 | 10.21 | 12.01 | 5.87  | 41.20 | 12.54 |
| WASHIM                  | MAHARASHTRA   | 3.87 | 1.88 | 24.45 | 7.58  | 8.84  | 3.77  | 30.70 | 9.81  |
| AMRAVATI                | MAHARASHTRA   | 2.96 | 2.04 | 9.93  | 3.69  | 5.02  | 1.92  | 27.69 | 10.48 |
| WARDHA                  | MAHARASHTRA   | 1.97 | 0.13 | 10.35 | 2.46  | 4.58  | 0.81  | 30.39 | 10.06 |
| NAGPUR                  | MAHARASHTRA   | 1.83 | 0.08 | 12.16 | 3.60  | 6.10  | 2.81  | 23.48 | 7.16  |
| BHANDARA                | MAHARASHTRA   | 2.66 | 0.95 | 14.09 | 3.69  | 5.98  | 1.87  | 25.64 | 8.41  |
| GONDIYA                 | MAHARASHTRA   | 3.11 | 1.46 | 12.75 | 4.57  | 6.53  | 2.22  | 30.23 | 10.86 |
| GADCHIROLI              | MAHARASHTRA   | 1.88 | 0.07 | 7.09  | 1.17  | 3.55  | 0.14  | 24.09 | 8.51  |
| CHANDRAPUR              | MAHARASHTRA   | 2.00 | 0.09 | 8.54  | 1.70  | 4.60  | 1.04  | 44.92 | 11.43 |
| YAVATMAL                | MAHARASHTRA   | 2.66 | 1.16 | 21.47 | 5.85  | 7.77  | 3.03  | 40.50 | 12.84 |
| NANDED                  | MAHARASHTRA   | 5.63 | 3.60 | 21.38 | 6.64  | 13.34 | 6.36  | 47.06 | 14.08 |
| HINGOLI                 | MAHARASHTRA   | 1.83 | 0.10 | 21.62 | 6.99  | 5.61  | 2.02  | 48.75 | 11.85 |
| PARBHANI                | MAHARASHTRA   | 5.69 | 2.99 | 41.17 | 10.09 | 15.77 | 8.41  | 68.39 | 10.56 |
| JALNA                   | MAHARASHTRA   | 6.03 | 3.19 | 37.21 | 8.07  | 15.87 | 5.55  | 62.24 | 11.17 |
| AURANGABAD              | MAHARASHTRA   | 2.27 | 0.97 | 35.07 | 9.80  | 11.52 | 5.12  | 60.60 | 13.12 |
| NASHIK                  | MAHARASHTRA   | 4.45 | 3.71 | 20.45 | 10.26 | 12.34 | 9.80  | 42.64 | 14.59 |

|                             |                |      |      |       |       |       |      |       |       |
|-----------------------------|----------------|------|------|-------|-------|-------|------|-------|-------|
| MUMBAI SUBURBAN             | MAHARASHTRA    | 5.27 | 2.90 | 28.96 | 6.31  | 9.32  | 3.77 | 50.28 | 14.32 |
| MUMBAI                      | MAHARASHTRA    | 2.33 | 0.11 | 11.92 | 2.09  | 4.68  | 0.24 | 54.21 | 11.75 |
| RAIGARH                     | MAHARASHTRA    | 2.75 | 1.16 | 11.40 | 2.74  | 5.42  | 1.56 | 41.76 | 13.06 |
| PUNE                        | MAHARASHTRA    | 3.77 | 3.08 | 28.45 | 7.61  | 14.46 | 6.47 | 49.70 | 12.72 |
| AHMADNAGAR                  | MAHARASHTRA    | 2.66 | 1.21 | 14.88 | 4.73  | 5.77  | 1.95 | 39.31 | 11.94 |
| BID                         | MAHARASHTRA    | 4.57 | 2.52 | 20.40 | 5.89  | 8.19  | 3.38 | 43.35 | 11.38 |
| LATUR                       | MAHARASHTRA    | 3.74 | 1.77 | 18.31 | 6.09  | 8.95  | 4.26 | 37.46 | 13.66 |
| OSMANABAD                   | MAHARASHTRA    | 2.24 | 0.70 | 11.58 | 3.51  | 4.74  | 1.56 | 43.25 | 14.83 |
| SOLAPUR                     | MAHARASHTRA    | 4.37 | 3.09 | 14.90 | 5.67  | 8.48  | 5.49 | 45.94 | 12.66 |
| SATARA                      | MAHARASHTRA    | 2.94 | 1.28 | 16.17 | 5.47  | 7.06  | 2.45 | 30.77 | 10.06 |
| RATNAGIRI                   | MAHARASHTRA    | 4.10 | 2.20 | 17.24 | 4.63  | 9.43  | 3.65 | 44.65 | 12.79 |
| SINDHUDURG                  | MAHARASHTRA    | 2.96 | 1.13 | 18.67 | 5.89  | 8.19  | 4.27 | 45.93 | 12.74 |
| KOLHAPUR                    | MAHARASHTRA    | 6.58 | 3.77 | 27.74 | 8.52  | 15.52 | 6.63 | 65.80 | 11.12 |
| SANGLI                      | MAHARASHTRA    | 2.89 | 1.35 | 20.58 | 6.45  | 7.60  | 2.58 | 56.39 | 15.85 |
| SRIKAKULAM                  | ANDHRA PRADESH | 3.69 | 1.83 | 16.16 | 4.56  | 6.46  | 2.07 | 22.89 | 7.94  |
| VIZIANAGARAM                | ANDHRA PRADESH | 2.19 | 0.11 | 19.65 | 5.84  | 6.57  | 2.19 | 48.96 | 13.61 |
| VISAKHAPATNAM               | ANDHRA PRADESH | 2.10 | 0.12 | 20.54 | 5.50  | 5.64  | 1.96 | 60.81 | 10.62 |
| EAST GODAVARI               | ANDHRA PRADESH | 5.40 | 2.84 | 33.06 | 8.22  | 14.50 | 4.95 | 42.28 | 11.22 |
| WEST GODAVARI               | ANDHRA PRADESH | 4.18 | 2.65 | 18.38 | 4.75  | 7.19  | 2.50 | 20.60 | 8.60  |
| KRISHNA                     | ANDHRA PRADESH | 4.68 | 4.21 | 13.98 | 4.38  | 8.73  | 4.36 | 43.67 | 11.95 |
| GUNTUR                      | ANDHRA PRADESH | 2.71 | 0.89 | 19.79 | 5.24  | 6.36  | 2.57 | 42.32 | 13.75 |
| PRAKASAM                    | ANDHRA PRADESH | 6.08 | 3.54 | 37.13 | 8.44  | 19.20 | 7.87 | 44.12 | 12.77 |
| SRI POTTI SRIRAMULU NELLORE | ANDHRA PRADESH | 6.61 | 5.39 | 29.89 | 7.71  | 12.93 | 6.19 | 31.40 | 10.09 |
| Y.S.R.                      | ANDHRA PRADESH | 5.20 | 2.88 | 17.01 | 5.30  | 8.54  | 3.39 | 37.39 | 13.87 |
| KURNOOL                     | ANDHRA PRADESH | 3.61 | 2.95 | 26.26 | 11.37 | 10.46 | 4.61 | 46.57 | 13.76 |
| ANANTAPUR                   | ANDHRA PRADESH | 3.19 | 1.45 | 17.34 | 4.59  | 6.51  | 2.22 | 35.27 | 12.53 |
| CHITTOOR                    | ANDHRA PRADESH | 2.68 | 1.18 | 28.93 | 7.89  | 8.52  | 3.21 | 40.50 | 13.75 |
| BELGAUM                     | KARNATAKA      | 2.74 | 2.26 | 14.78 | 4.97  | 5.94  | 3.20 | 38.43 | 12.75 |
| BAGALKOT                    | KARNATAKA      | 1.79 | 0.76 | 16.32 | 5.00  | 5.00  | 1.91 | 45.47 | 14.48 |
| BIJAPUR                     | KARNATAKA      | 3.25 | 1.83 | 21.86 | 7.94  | 11.07 | 4.94 | 51.62 | 12.07 |
| BIDAR                       | KARNATAKA      | 2.53 | 1.37 | 19.67 | 8.55  | 11.58 | 7.74 | 45.66 | 15.20 |
| RAICHUR                     | KARNATAKA      | 3.98 | 4.19 | 14.05 | 6.88  | 8.22  | 7.21 | 42.89 | 13.47 |
| KOPPAL                      | KARNATAKA      | 1.99 | 1.04 | 11.63 | 3.45  | 5.93  | 2.13 | 46.93 | 12.85 |
| GADAG                       | KARNATAKA      | 4.32 | 3.68 | 19.41 | 7.11  | 10.13 | 6.26 | 39.64 | 12.45 |
| DHARWAD                     | KARNATAKA      | 1.32 | 0.06 | 10.86 | 2.98  | 3.73  | 0.91 | 29.23 | 11.58 |
| UTTARA KANNADA              | KARNATAKA      | 1.77 | 0.82 | 8.26  | 2.58  | 4.00  | 1.51 | 30.48 | 11.77 |

|                     |             |      |      |       |       |       |      |       |       |
|---------------------|-------------|------|------|-------|-------|-------|------|-------|-------|
| HAVERI              | KARNATAKA   | 1.52 | 0.56 | 6.02  | 1.44  | 3.35  | 1.00 | 32.11 | 12.09 |
| BELLARY             | KARNATAKA   | 1.35 | 0.07 | 19.66 | 6.31  | 6.50  | 2.57 | 32.30 | 10.16 |
| CHITRADURGA         | KARNATAKA   | 1.72 | 0.57 | 6.73  | 1.44  | 3.30  | 0.60 | 17.91 | 7.67  |
| DAVANAGERE          | KARNATAKA   | 2.09 | 0.92 | 15.12 | 4.97  | 6.45  | 2.71 | 42.41 | 12.88 |
| SHIMOGA             | KARNATAKA   | 1.34 | 0.06 | 6.31  | 1.36  | 3.25  | 0.82 | 22.98 | 9.02  |
| UDUPI               | KARNATAKA   | 1.71 | 0.71 | 8.86  | 2.52  | 3.75  | 1.22 | 23.61 | 12.26 |
| CHIKMAGALUR         | KARNATAKA   | 1.35 | 0.06 | 8.35  | 2.76  | 2.70  | 0.14 | 33.37 | 12.23 |
| TUMKUR              | KARNATAKA   | 1.38 | 0.07 | 5.37  | 0.62  | 3.36  | 0.65 | 24.96 | 11.84 |
| BANGALORE           | KARNATAKA   | 2.79 | 1.51 | 15.02 | 6.52  | 7.98  | 3.88 | 43.08 | 13.62 |
| MANDYA              | KARNATAKA   | 1.43 | 0.06 | 7.57  | 1.75  | 2.99  | 0.10 | 17.30 | 6.31  |
| HASSAN              | KARNATAKA   | 1.46 | 0.04 | 6.18  | 1.15  | 2.89  | 0.09 | 31.37 | 10.89 |
| DAKSHINA<br>KANNADA | KARNATAKA   | 1.81 | 0.82 | 11.53 | 3.75  | 4.18  | 1.53 | 34.23 | 14.03 |
| KODAGU              | KARNATAKA   | 2.63 | 1.61 | 8.85  | 2.69  | 4.86  | 2.07 | 36.19 | 11.11 |
| MYSORE              | KARNATAKA   | 1.36 | 0.06 | 5.83  | 1.22  | 2.79  | 0.12 | 30.98 | 10.23 |
| CHAMARAJANAGA<br>R  | KARNATAKA   | 1.86 | 0.80 | 8.08  | 2.16  | 3.49  | 0.87 | 21.12 | 9.00  |
| GULBARGA            | KARNATAKA   | 2.88 | 1.97 | 21.15 | 7.35  | 11.18 | 4.96 | 48.43 | 14.39 |
| YADGIR              | KARNATAKA   | 3.03 | 2.45 | 15.81 | 5.48  | 8.21  | 4.16 | 49.29 | 13.89 |
| KOLAR               | KARNATAKA   | 4.10 | 4.75 | 10.39 | 4.88  | 7.16  | 5.03 | 20.78 | 8.34  |
| CHIKKABALLAPUR<br>A | KARNATAKA   | 2.00 | 0.99 | 14.13 | 5.90  | 4.81  | 1.64 | 22.60 | 7.83  |
| BANGALORE<br>RURAL  | KARNATAKA   | 1.34 | 0.06 | 6.85  | 1.58  | 2.57  | 0.11 | 23.02 | 10.04 |
| RAMANAGARA          | KARNATAKA   | 1.47 | 0.05 | 5.70  | 0.19  | 3.13  | 0.12 | 27.39 | 8.59  |
| NORTH GOA           | GOA         | 1.68 | 0.62 | 15.97 | 4.42  | 6.05  | 2.28 | 64.30 | 11.38 |
| SOUTH GOA           | GOA         | 1.50 | 0.06 | 10.05 | 2.25  | 4.51  | 0.99 | 72.72 | 12.02 |
| LAKSHADWEEP         | LAKSHADWEEP | 5.54 | 3.87 | 13.00 | 3.94  | 7.54  | 3.72 | 84.45 | 6.25  |
| KASARAGOD           | KERALA      | 1.94 | 0.72 | 10.88 | 3.37  | 4.87  | 1.57 | 64.78 | 14.62 |
| KANNUR              | KERALA      | 3.64 | 3.75 | 19.43 | 8.67  | 11.70 | 6.99 | 79.02 | 10.27 |
| WAYANAD             | KERALA      | 3.93 | 2.24 | 13.65 | 4.33  | 7.45  | 2.67 | 55.35 | 14.04 |
| KOZHICODE           | KERALA      | 2.44 | 1.16 | 11.41 | 3.55  | 6.88  | 2.35 | 81.44 | 9.16  |
| MALAPPURAM          | KERALA      | 2.36 | 1.11 | 16.78 | 6.07  | 9.37  | 3.79 | 69.98 | 14.90 |
| PALAKKAD            | KERALA      | 5.29 | 3.28 | 39.25 | 10.35 | 15.83 | 6.11 | 63.61 | 12.17 |
| THRISSUR            | KERALA      | 2.44 | 0.93 | 20.17 | 5.65  | 7.62  | 2.57 | 71.02 | 9.65  |
| ERNAKULAM           | KERALA      | 2.29 | 1.08 | 17.64 | 5.83  | 8.05  | 3.23 | 76.04 | 8.59  |
| IDUKKI              | KERALA      | 1.72 | 0.07 | 11.80 | 2.94  | 6.52  | 2.27 | 82.32 | 7.53  |
| KOTTAYAM            | KERALA      | 2.37 | 0.97 | 18.96 | 4.09  | 7.08  | 2.32 | 53.30 | 12.36 |
| ALAPPUZHA           | KERALA      | 1.79 | 0.08 | 28.97 | 9.50  | 9.51  | 3.91 | 57.18 | 12.34 |

|                    |            |      |      |       |      |       |      |       |       |
|--------------------|------------|------|------|-------|------|-------|------|-------|-------|
| PATHANAMTHITTA     | KERALA     | 1.87 | 0.08 | 19.82 | 5.50 | 9.52  | 3.53 | 58.43 | 12.32 |
| KOLLAM             | KERALA     | 2.36 | 1.01 | 17.27 | 4.99 | 10.17 | 3.91 | 69.42 | 9.41  |
| THIRUVANANTHAPURAM | KERALA     | 1.74 | 0.07 | 21.51 | 5.84 | 6.93  | 2.50 | 75.94 | 9.39  |
| THIRUVALLUR        | TAMIL NADU | 1.27 | 0.53 | 6.93  | 1.94 | 2.09  | 0.56 | 20.44 | 7.82  |
| CHENNAI            | TAMIL NADU | 1.05 | 0.04 | 5.18  | 1.16 | 2.27  | 0.73 | 31.36 | 9.60  |
| KANCHEEPURAM       | TAMIL NADU | 1.85 | 1.01 | 18.65 | 6.53 | 4.28  | 2.36 | 27.69 | 10.87 |
| VELLORE            | TAMIL NADU | 2.48 | 1.53 | 6.92  | 2.24 | 2.88  | 1.14 | 23.10 | 9.41  |
| TIRUVANNAMALAI     | TAMIL NADU | 1.41 | 0.53 | 5.07  | 0.88 | 2.41  | 0.64 | 17.84 | 7.12  |
| VILUPPURAM         | TAMIL NADU | 1.05 | 0.05 | 8.60  | 2.46 | 2.43  | 0.69 | 22.66 | 9.72  |
| SALEM              | TAMIL NADU | 1.08 | 0.04 | 12.49 | 3.87 | 4.93  | 2.13 | 32.91 | 11.30 |
| NAMAKKAL           | TAMIL NADU | 1.37 | 0.59 | 9.79  | 2.83 | 2.36  | 0.72 | 22.29 | 8.35  |
| ERODE              | TAMIL NADU | 1.00 | 0.04 | 5.79  | 1.64 | 1.71  | 0.08 | 20.54 | 8.12  |
| THE NILGIRIS       | TAMIL NADU | 1.01 | 0.04 | 6.85  | 1.83 | 2.82  | 1.08 | 28.05 | 10.59 |
| DINDIGUL           | TAMIL NADU | 1.21 | 0.44 | 6.18  | 1.49 | 2.42  | 0.72 | 14.03 | 6.00  |
| KARUR              | TAMIL NADU | 1.80 | 0.88 | 10.77 | 4.04 | 2.89  | 0.96 | 33.69 | 11.98 |
| TIRUCHIRAPPALLI    | TAMIL NADU | 1.41 | 0.57 | 5.28  | 0.86 | 2.37  | 0.66 | 31.10 | 11.18 |
| PERAMBALUR         | TAMIL NADU | 1.74 | 0.99 | 6.72  | 1.86 | 2.86  | 1.10 | 22.77 | 8.48  |
| ARIYALUR           | TAMIL NADU | 1.04 | 0.04 | 6.80  | 1.68 | 1.86  | 0.07 | 12.16 | 4.65  |
| CUDDALORE          | TAMIL NADU | 1.33 | 0.48 | 12.90 | 5.25 | 2.26  | 0.56 | 23.70 | 9.62  |
| NAGAPATTINAM       | TAMIL NADU | 1.05 | 0.04 | 5.99  | 1.61 | 2.33  | 0.70 | 21.10 | 8.38  |
| THIRUVARUR         | TAMIL NADU | 1.07 | 0.03 | 5.50  | 1.19 | 1.86  | 0.08 | 25.11 | 10.16 |
| THANJAVUR          | TAMIL NADU | 1.42 | 0.62 | 11.28 | 4.72 | 3.96  | 2.75 | 16.89 | 6.40  |
| PUDUKKOTTAI        | TAMIL NADU | 1.24 | 0.50 | 9.01  | 3.89 | 2.46  | 0.68 | 20.74 | 8.66  |
| SIVAGANGA          | TAMIL NADU | 1.25 | 0.42 | 7.95  | 2.37 | 2.61  | 0.85 | 21.13 | 10.11 |
| MADURAI            | TAMIL NADU | 1.71 | 0.88 | 8.43  | 2.32 | 2.73  | 0.95 | 20.83 | 8.80  |
| THENI              | TAMIL NADU | 1.14 | 0.45 | 5.27  | 1.49 | 2.21  | 0.80 | 11.04 | 3.58  |
| VIRUDHUNAGAR       | TAMIL NADU | 1.03 | 0.04 | 12.97 | 3.64 | 1.76  | 0.06 | 22.31 | 9.48  |
| RAMANATHAPURAM     | TAMIL NADU | 2.52 | 2.33 | 7.56  | 2.97 | 2.53  | 0.83 | 16.97 | 6.78  |
| THOOTHUKKUDI       | TAMIL NADU | 1.00 | 0.04 | 3.78  | 0.12 | 1.71  | 0.06 | 13.73 | 4.58  |
| TIRUNELVELI        | TAMIL NADU | 1.30 | 0.43 | 6.40  | 1.60 | 2.12  | 0.48 | 14.49 | 5.48  |
| KANNIYAKUMARI      | TAMIL NADU | 1.02 | 0.04 | 5.44  | 1.18 | 1.88  | 0.08 | 18.72 | 8.58  |
| DHARMAPURI         | TAMIL NADU | 1.27 | 0.54 | 7.57  | 2.84 | 2.54  | 0.86 | 24.72 | 10.19 |
| KRISHNAGIRI        | TAMIL NADU | 1.58 | 0.84 | 9.36  | 3.15 | 4.31  | 1.84 | 25.15 | 10.78 |
| COIMBATORE         | TAMIL NADU | 1.42 | 0.72 | 6.34  | 1.59 | 2.42  | 0.76 | 15.10 | 5.80  |
| TIRUPPUR           | TAMIL NADU | 1.09 | 0.04 | 5.66  | 1.28 | 2.66  | 0.90 | 31.42 | 10.49 |
| YANAM              | PUDUCHERRY | 2.17 | 1.12 | 15.86 | 5.16 | 4.16  | 1.65 | 27.35 | 11.28 |

|                         |                           |       |       |       |       |       |       |       |       |
|-------------------------|---------------------------|-------|-------|-------|-------|-------|-------|-------|-------|
| PUDUCHERRY              | PUDUCHERRY                | 1.34  | 0.07  | 17.06 | 6.49  | 3.50  | 1.34  | 16.01 | 6.22  |
| MAHE                    | PUDUCHERRY                | 2.00  | 0.85  | 8.27  | 1.58  | 2.63  | 0.12  | 16.04 | 5.13  |
| KARAIKAL                | PUDUCHERRY                | 1.78  | 0.72  | 12.01 | 3.02  | 3.37  | 1.00  | 17.21 | 7.18  |
| NICOBARS                | ANDAMAN & NICOBAR ISLANDS | 7.67  | 4.51  | 27.67 | 7.43  | 20.08 | 7.58  | 38.41 | 12.08 |
| NORTH & MIDDLE ANDAMAN  | ANDAMAN & NICOBAR ISLANDS | 2.34  | 0.11  | 14.31 | 3.23  | 10.61 | 3.50  | 23.93 | 8.23  |
| SOUTH ANDAMAN           | ANDAMAN & NICOBAR ISLANDS | 2.01  | 0.06  | 20.62 | 5.69  | 14.15 | 5.30  | 21.87 | 7.18  |
| EAST SIANG              | ARUNACHAL PRADESH         | 9.57  | 5.21  | 47.74 | 10.22 | 15.46 | 6.99  | 49.28 | 12.08 |
| KRA DAADI               | ARUNACHAL PRADESH         | 6.98  | 3.03  | 35.83 | 8.29  | 15.94 | 6.69  | 63.42 | 11.60 |
| KURUNG KUMEY            | ARUNACHAL PRADESH         | 5.47  | 2.31  | 26.19 | 8.57  | 9.63  | 4.12  | 50.92 | 12.60 |
| LOHIT                   | ARUNACHAL PRADESH         | 4.55  | 2.03  | 25.44 | 8.45  | 10.68 | 3.76  | 57.17 | 12.85 |
| LONGDING                | ARUNACHAL PRADESH         | 22.19 | 14.24 | 43.42 | 11.51 | 31.30 | 12.90 | 43.23 | 14.36 |
| NAMSAI                  | ARUNACHAL PRADESH         | 8.88  | 6.81  | 27.26 | 9.32  | 13.78 | 7.17  | 38.56 | 11.81 |
| SIANG                   | ARUNACHAL PRADESH         | 8.98  | 4.80  | 33.35 | 8.96  | 16.45 | 6.15  | 48.02 | 14.65 |
| TIRAP                   | ARUNACHAL PRADESH         | 6.42  | 2.73  | 30.84 | 10.56 | 16.70 | 7.13  | 40.16 | 12.37 |
| WEST SIANG              | ARUNACHAL PRADESH         | 4.89  | 2.12  | 40.76 | 9.45  | 10.96 | 3.84  | 61.24 | 12.42 |
| BISWANATH               | ASSAM                     | 5.33  | 2.70  | 31.94 | 9.68  | 11.43 | 5.19  | 65.37 | 12.97 |
| CHARAIDEO               | ASSAM                     | 4.03  | 1.64  | 25.45 | 7.25  | 9.44  | 3.49  | 63.50 | 13.28 |
| DHUBRI                  | ASSAM                     | 4.54  | 2.87  | 25.79 | 9.04  | 11.83 | 7.72  | 57.43 | 16.07 |
| HOJAI                   | ASSAM                     | 15.59 | 9.80  | 39.35 | 10.64 | 29.77 | 12.40 | 67.66 | 13.46 |
| JORHAT                  | ASSAM                     | 4.39  | 1.87  | 26.75 | 7.33  | 12.29 | 5.28  | 63.30 | 11.66 |
| KARBI ANGLONG           | ASSAM                     | 9.34  | 5.20  | 35.12 | 8.30  | 20.30 | 8.96  | 72.73 | 13.52 |
| MAJULI                  | ASSAM                     | 4.04  | 1.92  | 21.15 | 6.72  | 8.46  | 3.71  | 63.77 | 13.59 |
| NAGAON                  | ASSAM                     | 8.40  | 5.99  | 38.33 | 10.13 | 24.37 | 10.23 | 67.28 | 13.01 |
| SIVASAGAR               | ASSAM                     | 4.41  | 2.14  | 22.33 | 6.13  | 9.21  | 3.39  | 46.03 | 14.34 |
| SONITPUR                | ASSAM                     | 9.72  | 5.22  | 28.35 | 7.93  | 15.09 | 6.43  | 51.84 | 13.42 |
| SOUTH SALMARA MANCACHAR | ASSAM                     | 7.26  | 4.54  | 32.59 | 10.06 | 12.40 | 5.91  | 81.66 | 9.23  |
| WEST KARBI ANGLONG      | ASSAM                     | 7.66  | 5.38  | 43.32 | 11.72 | 23.52 | 10.43 | 71.48 | 12.00 |
| BALOD                   | CHHATTISGARH              | 2.76  | 1.40  | 13.48 | 4.09  | 5.95  | 2.24  | 21.64 | 6.84  |
| BALODA BAZAR            | CHHATTISGARH              | 2.34  | 1.13  | 20.55 | 6.02  | 7.98  | 2.96  | 51.68 | 13.26 |
| BALRAMPUR               | CHHATTISGARH              | 3.80  | 2.88  | 18.94 | 5.78  | 7.43  | 3.61  | 54.91 | 14.92 |

|                 |              |      |      |       |       |       |      |       |       |
|-----------------|--------------|------|------|-------|-------|-------|------|-------|-------|
| BASTAR          | CHHATTISGARH | 3.05 | 1.51 | 34.65 | 10.01 | 12.15 | 5.77 | 56.90 | 14.23 |
| BEMETARA        | CHHATTISGARH | 1.57 | 0.07 | 8.63  | 3.18  | 5.00  | 2.80 | 46.14 | 11.95 |
| BILASPUR        | CHHATTISGARH | 5.22 | 4.10 | 40.81 | 10.21 | 13.76 | 6.58 | 45.67 | 12.61 |
| DANTEWADA       | CHHATTISGARH | 2.87 | 2.89 | 18.42 | 6.73  | 10.80 | 5.96 | 46.07 | 12.81 |
| DURG            | CHHATTISGARH | 2.34 | 1.75 | 14.97 | 4.88  | 5.48  | 2.56 | 30.95 | 12.37 |
| GARIYABAND      | CHHATTISGARH | 2.47 | 1.27 | 14.21 | 4.60  | 5.22  | 1.89 | 43.35 | 14.14 |
| KODAGAON        | CHHATTISGARH | 2.71 | 1.24 | 24.81 | 7.99  | 8.92  | 3.24 | 62.45 | 13.94 |
| MUNGELI         | CHHATTISGARH | 1.96 | 0.67 | 17.81 | 5.31  | 7.46  | 3.46 | 43.21 | 13.38 |
| RAIPUR          | CHHATTISGARH | 2.61 | 1.38 | 21.13 | 9.20  | 8.10  | 6.14 | 33.87 | 12.70 |
| SUKMA           | CHHATTISGARH | 4.29 | 3.00 | 20.05 | 8.74  | 14.19 | 8.00 | 36.63 | 11.87 |
| SURAJPUR        | CHHATTISGARH | 3.90 | 3.30 | 16.66 | 5.69  | 11.10 | 5.10 | 43.78 | 14.11 |
| SURGUJA         | CHHATTISGARH | 2.98 | 2.15 | 13.34 | 4.21  | 3.61  | 1.22 | 43.46 | 14.49 |
| CENTRAL         | NCT OF DELHI | 2.99 | 1.49 | 15.68 | 4.92  | 6.25  | 2.71 | 23.98 | 9.77  |
| EAST            | NCT OF DELHI | 2.64 | 1.35 | 21.58 | 5.86  | 6.66  | 2.77 | 23.78 | 9.79  |
| NEW DELHI       | NCT OF DELHI | 1.68 | 0.07 | 15.92 | 4.71  | 5.65  | 2.11 | 18.62 | 7.84  |
| NORTH           | NCT OF DELHI | 4.05 | 3.89 | 30.31 | 9.61  | 7.14  | 4.10 | 28.45 | 8.97  |
| NORTH EAST      | NCT OF DELHI | 2.98 | 2.87 | 12.67 | 4.33  | 5.75  | 3.31 | 26.04 | 11.68 |
| NORTH WEST      | NCT OF DELHI | 4.05 | 2.04 | 18.21 | 5.86  | 7.89  | 3.78 | 19.09 | 8.30  |
| SHAHDARA        | NCT OF DELHI | 2.18 | 0.73 | 15.49 | 4.21  | 6.03  | 2.05 | 35.99 | 10.71 |
| SOUTH           | NCT OF DELHI | 2.20 | 0.75 | 13.25 | 4.77  | 4.41  | 1.21 | 22.36 | 7.98  |
| SOUTH EAST      | NCT OF DELHI | 4.83 | 3.61 | 25.62 | 8.98  | 8.49  | 3.98 | 14.87 | 5.78  |
| SOUTH WEST      | NCT OF DELHI | 2.94 | 1.54 | 20.70 | 7.09  | 6.51  | 2.56 | 17.59 | 7.22  |
| WEST            | NCT OF DELHI | 4.49 | 3.21 | 26.03 | 8.70  | 6.83  | 2.75 | 23.75 | 10.09 |
| AHMADABAD       | GUJARAT      | 6.41 | 3.40 | 28.36 | 7.03  | 11.52 | 4.69 | 48.55 | 12.75 |
| ARAVALI         | GUJARAT      | 4.96 | 2.84 | 18.46 | 6.79  | 8.78  | 3.26 | 55.64 | 13.11 |
| BHAVNAGAR       | GUJARAT      | 5.36 | 3.90 | 21.09 | 6.37  | 12.13 | 5.13 | 67.02 | 11.45 |
| BOTAD           | GUJARAT      | 6.59 | 4.79 | 30.50 | 8.62  | 16.83 | 7.49 | 74.30 | 9.66  |
| CHHOTA UDAIPUR  | GUJARAT      | 4.51 | 4.97 | 15.50 | 6.28  | 8.15  | 5.11 | 44.02 | 10.71 |
| DEVBHUMI DWARKA | GUJARAT      | 4.65 | 3.07 | 20.04 | 8.46  | 12.40 | 6.95 | 53.92 | 14.60 |
| GIR SOMNATH     | GUJARAT      | 2.86 | 1.07 | 25.03 | 6.48  | 13.23 | 5.68 | 66.23 | 14.77 |
| JAMNAGAR        | GUJARAT      | 2.28 | 0.11 | 17.25 | 4.59  | 7.10  | 2.71 | 31.83 | 12.96 |
| JUNAGADH        | GUJARAT      | 3.24 | 1.54 | 10.35 | 2.99  | 5.30  | 1.56 | 41.67 | 12.20 |
| KHEDA           | GUJARAT      | 4.06 | 4.03 | 23.87 | 10.78 | 9.82  | 5.90 | 50.77 | 13.00 |
| MAHISAGAR       | GUJARAT      | 5.98 | 5.45 | 17.40 | 6.74  | 7.39  | 3.36 | 46.29 | 14.30 |
| MORBI           | GUJARAT      | 4.65 | 2.02 | 28.81 | 8.71  | 13.55 | 5.65 | 46.82 | 14.64 |
| PANCH MAHALS    | GUJARAT      | 2.03 | 0.49 | 7.00  | 1.64  | 4.50  | 1.44 | 50.31 | 13.43 |
| RAJKOT          | GUJARAT      | 3.96 | 3.19 | 14.58 | 6.10  | 8.97  | 4.00 | 51.40 | 15.02 |

|                          |                |       |       |       |       |       |       |       |       |
|--------------------------|----------------|-------|-------|-------|-------|-------|-------|-------|-------|
| SABAR KANTHA             | GUJARAT        | 2.81  | 1.01  | 11.31 | 3.72  | 6.08  | 2.97  | 28.93 | 11.39 |
| SURENDRANAGAR            | GUJARAT        | 6.51  | 4.14  | 34.07 | 10.15 | 17.32 | 9.62  | 36.81 | 11.55 |
| VADODARA                 | GUJARAT        | 3.28  | 1.64  | 14.43 | 4.41  | 6.47  | 2.40  | 56.69 | 12.85 |
| BHIWANI                  | HARYANA        | 2.03  | 0.80  | 23.63 | 7.92  | 4.21  | 1.44  | 42.93 | 13.94 |
| CHARKHI DADRI            | HARYANA        | 3.51  | 1.68  | 14.44 | 3.74  | 5.18  | 1.63  | 32.96 | 11.10 |
| AGAR MALWA               | MADHYA PRADESH | 3.74  | 1.96  | 20.97 | 5.90  | 11.71 | 4.79  | 29.95 | 10.48 |
| SHAJAPUR                 | MADHYA PRADESH | 1.94  | 0.59  | 10.49 | 2.89  | 3.96  | 1.05  | 39.77 | 14.92 |
| PALGHAR                  | MAHARASHTRA    | 2.15  | 0.12  | 9.70  | 2.27  | 4.02  | 0.27  | 36.74 | 10.45 |
| THANE                    | MAHARASHTRA    | 4.95  | 4.29  | 22.84 | 7.16  | 11.32 | 5.65  | 54.50 | 12.91 |
| EAST GARO HILLS          | MEGHALAYA      | 10.81 | 7.42  | 24.86 | 9.35  | 15.41 | 7.36  | 86.72 | 7.06  |
| EAST JANTIA HILLS        | MEGHALAYA      | 7.73  | 6.78  | 24.68 | 8.65  | 14.41 | 7.96  | 60.04 | 19.16 |
| NORTH GARO HILLS         | MEGHALAYA      | 23.39 | 11.73 | 44.63 | 9.79  | 32.10 | 11.58 | 89.82 | 4.60  |
| SOUTH WEST GARO HILLS    | MEGHALAYA      | 5.85  | 3.11  | 18.27 | 7.06  | 9.70  | 3.96  | 77.10 | 10.63 |
| SOUTH WEST KHASI HILLS   | MEGHALAYA      | 4.51  | 2.75  | 20.70 | 8.00  | 11.95 | 4.98  | 75.99 | 15.86 |
| WEST GARO HILLS          | MEGHALAYA      | 3.51  | 0.19  | 21.84 | 7.67  | 11.83 | 6.25  | 81.08 | 10.51 |
| WEST JAINTIA HILLS       | MEGHALAYA      | 8.45  | 5.77  | 36.44 | 12.66 | 23.17 | 10.78 | 64.75 | 16.33 |
| WEST KHASI HILLS         | MEGHALAYA      | 15.95 | 14.47 | 35.01 | 14.07 | 25.52 | 14.91 | 73.40 | 15.41 |
| FAZILKA                  | PUNJAB         | 3.30  | 2.68  | 30.89 | 9.92  | 10.77 | 4.29  | 46.50 | 12.76 |
| FIROZPUR                 | PUNJAB         | 2.91  | 1.23  | 23.25 | 8.02  | 8.63  | 2.86  | 43.89 | 11.11 |
| GURDASPUR                | PUNJAB         | 4.39  | 2.41  | 17.86 | 5.72  | 9.12  | 4.57  | 47.16 | 11.97 |
| PATHANKOT                | PUNJAB         | 3.49  | 1.78  | 20.41 | 7.96  | 7.09  | 2.69  | 41.62 | 13.78 |
| ADILABAD                 | TELANGANA      | 5.18  | 4.16  | 21.02 | 10.79 | 6.40  | 3.77  | 31.35 | 10.82 |
| BHADRADRI KOTHAGUDEM     | TELANGANA      | 2.25  | 0.77  | 17.07 | 5.03  | 4.01  | 2.35  | 29.24 | 11.24 |
| HYDERABAD                | TELANGANA      | 7.60  | 4.38  | 21.82 | 7.68  | 11.42 | 4.56  | 34.03 | 13.00 |
| JAGITIAL                 | TELANGANA      | 3.16  | 1.48  | 18.32 | 6.57  | 5.29  | 2.03  | 37.64 | 11.60 |
| JANGOAN                  | TELANGANA      | 3.31  | 1.64  | 13.67 | 4.11  | 4.59  | 1.54  | 24.18 | 8.98  |
| JAYASHANKAR BHUPALAPALLY | TELANGANA      | 3.34  | 1.56  | 13.09 | 3.44  | 3.98  | 0.98  | 24.65 | 8.99  |
| JOGULAMBA GADWAL         | TELANGANA      | 3.82  | 2.00  | 12.70 | 5.11  | 4.96  | 1.87  | 33.53 | 12.84 |
| KAMAREDDY                | TELANGANA      | 2.73  | 1.19  | 18.61 | 5.93  | 5.87  | 2.10  | 32.51 | 10.65 |
| KARIMNAGAR               | TELANGANA      | 3.25  | 3.27  | 21.29 | 6.01  | 5.43  | 1.95  | 46.37 | 11.54 |
| KHAMMAM                  | TELANGANA      | 2.61  | 1.25  | 12.16 | 3.28  | 3.90  | 1.15  | 19.26 | 7.67  |
| KOMARAM BHEEM ASIFABAD   | TELANGANA      | 1.77  | 0.08  | 17.16 | 7.23  | 3.76  | 0.99  | 29.02 | 10.94 |
| MAHABUBABAD              | TELANGANA      | 4.48  | 2.39  | 15.46 | 4.33  | 7.07  | 2.62  | 34.67 | 12.23 |

|                     |               |       |      |       |       |       |      |       |       |
|---------------------|---------------|-------|------|-------|-------|-------|------|-------|-------|
| MAHABUBNAGAR        | TELANGANA     | 2.13  | 0.68 | 10.97 | 4.41  | 3.77  | 1.29 | 26.52 | 13.92 |
| MANCHERIAL          | TELANGANA     | 2.52  | 1.12 | 18.69 | 5.98  | 7.24  | 2.81 | 35.76 | 12.62 |
| MEDAK               | TELANGANA     | 3.50  | 1.48 | 24.61 | 6.50  | 8.98  | 3.47 | 47.52 | 12.86 |
| MEDCHAL-MALKAJIRI   | TELANGANA     | 3.54  | 1.78 | 22.05 | 7.20  | 7.73  | 4.21 | 37.90 | 12.33 |
| NAGARKURNOOL        | TELANGANA     | 4.12  | 2.37 | 16.85 | 5.07  | 6.46  | 2.69 | 27.66 | 11.67 |
| NALGONDA            | TELANGANA     | 4.35  | 2.33 | 16.46 | 4.71  | 4.76  | 1.51 | 46.70 | 12.70 |
| NIRMAL              | TELANGANA     | 2.41  | 0.87 | 19.20 | 6.42  | 3.61  | 0.82 | 26.64 | 8.80  |
| NIZAMABAD           | TELANGANA     | 2.57  | 2.11 | 13.79 | 5.65  | 4.25  | 2.24 | 47.00 | 13.32 |
| PEDDAPALLI          | TELANGANA     | 2.74  | 1.20 | 20.89 | 6.13  | 3.92  | 1.28 | 27.81 | 10.46 |
| RAJANNA SIRCILLA    | TELANGANA     | 3.21  | 1.55 | 13.25 | 3.95  | 4.46  | 1.66 | 32.33 | 11.01 |
| RANGA REDDY         | TELANGANA     | 4.74  | 3.97 | 13.66 | 5.43  | 7.92  | 4.82 | 36.10 | 13.07 |
| SANGAREDDY          | TELANGANA     | 2.66  | 1.00 | 18.92 | 7.11  | 6.58  | 2.90 | 46.03 | 12.94 |
| SIDDIPET            | TELANGANA     | 3.13  | 1.57 | 25.76 | 9.38  | 5.00  | 1.76 | 45.17 | 13.80 |
| SURYAPET            | TELANGANA     | 4.54  | 2.47 | 22.67 | 6.65  | 7.40  | 3.01 | 37.05 | 12.85 |
| VIKARABAD           | TELANGANA     | 2.53  | 1.23 | 12.67 | 3.96  | 4.72  | 1.74 | 41.29 | 12.29 |
| WANAPARTHY          | TELANGANA     | 2.54  | 1.04 | 13.79 | 4.20  | 3.77  | 0.97 | 47.28 | 12.43 |
| WARANGAL RURAL      | TELANGANA     | 3.44  | 1.79 | 14.90 | 3.86  | 4.90  | 1.78 | 36.41 | 12.26 |
| WARANGAL URBAN      | TELANGANA     | 3.71  | 1.83 | 21.79 | 5.69  | 5.24  | 1.85 | 21.07 | 7.40  |
| YADADRI BHUVANAGIRI | TELANGANA     | 3.87  | 2.29 | 19.92 | 6.11  | 6.66  | 2.86 | 25.78 | 8.37  |
| GOMATI              | TRIPURA       | 3.51  | 1.87 | 31.56 | 8.20  | 8.33  | 3.09 | 74.59 | 10.55 |
| KHOWAI              | TRIPURA       | 3.69  | 3.51 | 31.48 | 9.23  | 12.92 | 6.24 | 57.51 | 12.27 |
| NORTH TRIPURA       | TRIPURA       | 2.75  | 1.20 | 27.99 | 8.36  | 18.61 | 7.47 | 60.16 | 14.66 |
| SEPAHIJALA          | TRIPURA       | 3.06  | 1.63 | 28.42 | 7.56  | 11.61 | 4.54 | 53.15 | 12.70 |
| SOUTH TRIPURA       | TRIPURA       | 2.13  | 0.71 | 42.46 | 11.06 | 11.37 | 5.65 | 52.93 | 11.82 |
| UNAKOTI             | TRIPURA       | 3.30  | 1.76 | 31.48 | 9.73  | 11.70 | 5.23 | 48.91 | 13.21 |
| WEST TRIPURA        | TRIPURA       | 2.58  | 1.08 | 16.71 | 4.56  | 7.03  | 2.35 | 31.51 | 9.85  |
| AMETHI              | UTTAR PRADESH | 3.77  | 1.49 | 21.56 | 6.44  | 11.22 | 4.98 | 29.41 | 11.06 |
| BUDAUN              | UTTAR PRADESH | 5.65  | 3.72 | 28.51 | 12.36 | 10.99 | 5.17 | 38.36 | 9.94  |
| GHAZIABAD           | UTTAR PRADESH | 7.31  | 4.46 | 28.69 | 8.27  | 14.06 | 6.41 | 43.14 | 12.19 |
| HAPUR               | UTTAR PRADESH | 3.01  | 1.23 | 15.46 | 5.54  | 7.17  | 2.79 | 23.06 | 11.04 |
| MORADABAD           | UTTAR PRADESH | 3.35  | 1.58 | 15.21 | 6.62  | 8.83  | 4.93 | 37.41 | 15.92 |
| MUZAFFARNAGAR       | UTTAR PRADESH | 11.14 | 7.18 | 29.28 | 8.71  | 18.14 | 8.26 | 35.01 | 12.00 |
| RAE BARELI          | UTTAR PRADESH | 4.66  | 4.66 | 23.05 | 9.32  | 12.52 | 8.65 | 41.43 | 13.11 |
| SAMBHAL             | UTTAR PRADESH | 3.18  | 1.31 | 15.08 | 5.38  | 7.51  | 3.59 | 27.59 | 11.38 |
| SHAMLI              | UTTAR PRADESH | 5.50  | 5.76 | 11.15 | 5.03  | 6.79  | 4.94 | 26.35 | 12.68 |



|                       |               |      |      |       |      |      |      |       |       |
|-----------------------|---------------|------|------|-------|------|------|------|-------|-------|
| SULTANPUR             | UTTAR PRADESH | 4.88 | 2.76 | 19.13 | 6.69 | 9.35 | 3.44 | 41.53 | 10.21 |
| PASCHIM<br>BARDDHAMAN | WEST BENGAL   | 1.07 | 0.42 | 26.28 | 8.57 | 5.50 | 2.81 | 23.55 | 9.06  |
| PURBA<br>BARDDHAMAN   | WEST BENGAL   | 0.84 | 0.04 | 5.30  | 0.94 | 2.02 | 0.09 | 23.44 | 10.11 |

<sup>1</sup> Precision-weighted estimates from multilevel models

"ZD" - Zero Dose. All surviving children aged 12–23 months who did not receive the first dose of diphtheria, tetanus, and pertussis -containing vaccine.

"BI" - Basic immunisation incomplete. All surviving children aged 12–23 months who did not receive 8 vaccine doses recommended in the first year of life: 1 dose of Bacillus Calmette-Guérin (BCG) vaccine, 3 doses of pentavalent vaccine, 3 doses of oral polio vaccine, 1 dose of measles-rubella vaccine.

"No MR-1" - All surviving children aged 12-23 months who did not receive the first dose of measles-rubella-containing vaccine.

"No MR-2" - All surviving children aged 24-35 months who did not receive the second dose of measles-rubella-containing vaccine.

"No Polio-3" - All surviving children aged 12-23 months who did not receive the third dose of oral polio vaccine (OPV).

**Table S5. Distribution of 707 districts by district mean prevalence and within-district, between-cluster standard deviation (SD) for four indicators of child under-vaccination, NFHS-5, India**

| Indicator               | Standard Deviation (SD) |               |             | # Districts  |
|-------------------------|-------------------------|---------------|-------------|--------------|
| <b>Zero Dose</b>        |                         |               |             |              |
| <b>Mean Prevalence</b>  | <b>Low</b>              | <b>Medium</b> | <b>High</b> | <b>Total</b> |
| <b>Low</b>              | 221                     | 14            | 1           | 236          |
| <b>Medium</b>           | 14                      | 190           | 32          | 236          |
| <b>High</b>             | 1                       | 32            | 202         | 235          |
| <b>Total</b>            | 236                     | 236           | 235         | 701          |
| <b>Basic Incomplete</b> |                         |               |             |              |
| <b>Mean Prevalence</b>  | <b>Low</b>              | <b>Medium</b> | <b>High</b> | <b>Total</b> |
| <b>Low</b>              | 211                     | 25            | 0           | 236          |
| <b>Medium</b>           | 25                      | 179           | 32          | 236          |
| <b>High</b>             | 0                       | 32            | 203         | 235          |
| <b>Total</b>            | 236                     | 236           | 235         | 707          |
| <b>No MR-1</b>          |                         |               |             |              |
| <b>Mean Prevalence</b>  | <b>Low</b>              | <b>Medium</b> | <b>High</b> | <b>Total</b> |
| <b>Low</b>              | 213                     | 23            | 0           | 236          |
| <b>Medium</b>           | 23                      | 186           | 27          | 236          |
| <b>High</b>             | 0                       | 27            | 208         | 235          |
| <b>Total</b>            | 236                     | 236           | 235         | 707          |
| <b>No MR-2</b>          |                         |               |             |              |
| <b>Mean Prevalence</b>  | <b>Low</b>              | <b>Medium</b> | <b>High</b> | <b>Total</b> |
| <b>Low</b>              | 176                     | 52            | 8           | 236          |
| <b>Medium</b>           | 23                      | 114           | 99          | 236          |
| <b>High</b>             | 37                      | 70            | 128         | 235          |
| <b>Total</b>            | 236                     | 236           | 235         | 707          |

"Zero-dose" - All surviving children aged 12–23 months who did not receive the first dose of diphtheria, tetanus, and pertussis -containing vaccine.

"Basic Incomplete" - All surviving children aged 12–23 months who did not receive 8 vaccine doses recommended in the first year of life: 1 dose of Bacillus Calmette-Guérin (BCG) vaccine, 3 doses of pentavalent vaccine, 3 doses of oral polio vaccine, 1 dose of measles-rubella vaccine.

"No MR-1" - All surviving children aged 12-23 months who did not receive the first dose of measles-rubella-containing vaccine.

"No MR-2" - All surviving children aged 24-35 months who did not receive the second dose of measles-rubella-containing vaccine.

**Figure S6. Dot plots showing the distribution of standard deviations (SDs) for four indicators of child under-vaccination across 707 districts, NFHS-5, India**

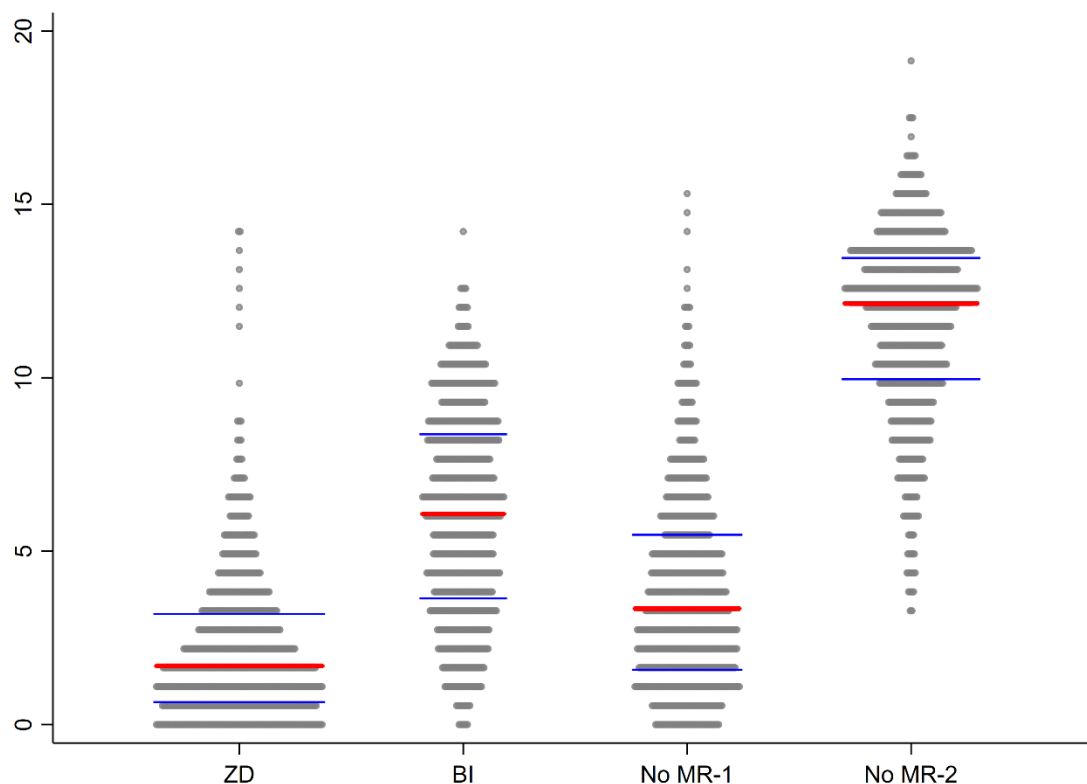

Note: Red lines represent median SD; blue lines represent 25th and 75th percentiles of SD.

"ZD" - Zero Dose: All surviving children aged 12–23 months who did not receive the first dose of diphtheria, tetanus, and pertussis -containing vaccine.

"BI" - Basic incomplete: All surviving children aged 12–23 months who did not receive 8 basic vaccine doses recommended in the first year of life: 1 dose of Bacillus Calmette-Guérin (BCG) vaccine, 3 doses of pentavalent vaccine, 3 doses of oral polio vaccine, 1 dose of measles-rubella vaccine.

"No MR-1" - All surviving children aged 12-23 months who did not receive the first dose of measles-rubella-containing vaccine.

"No MR-2" - All surviving children aged 24-35 months who did not receive the second dose of measles-rubella-containing vaccine.

**Figure S7. Box plots of predicted small-area cluster<sup>1</sup> mean prevalence for four indicators of under-vaccination across states and Union Territories, National Family Health Survey 2019-21, India (without outliers)**

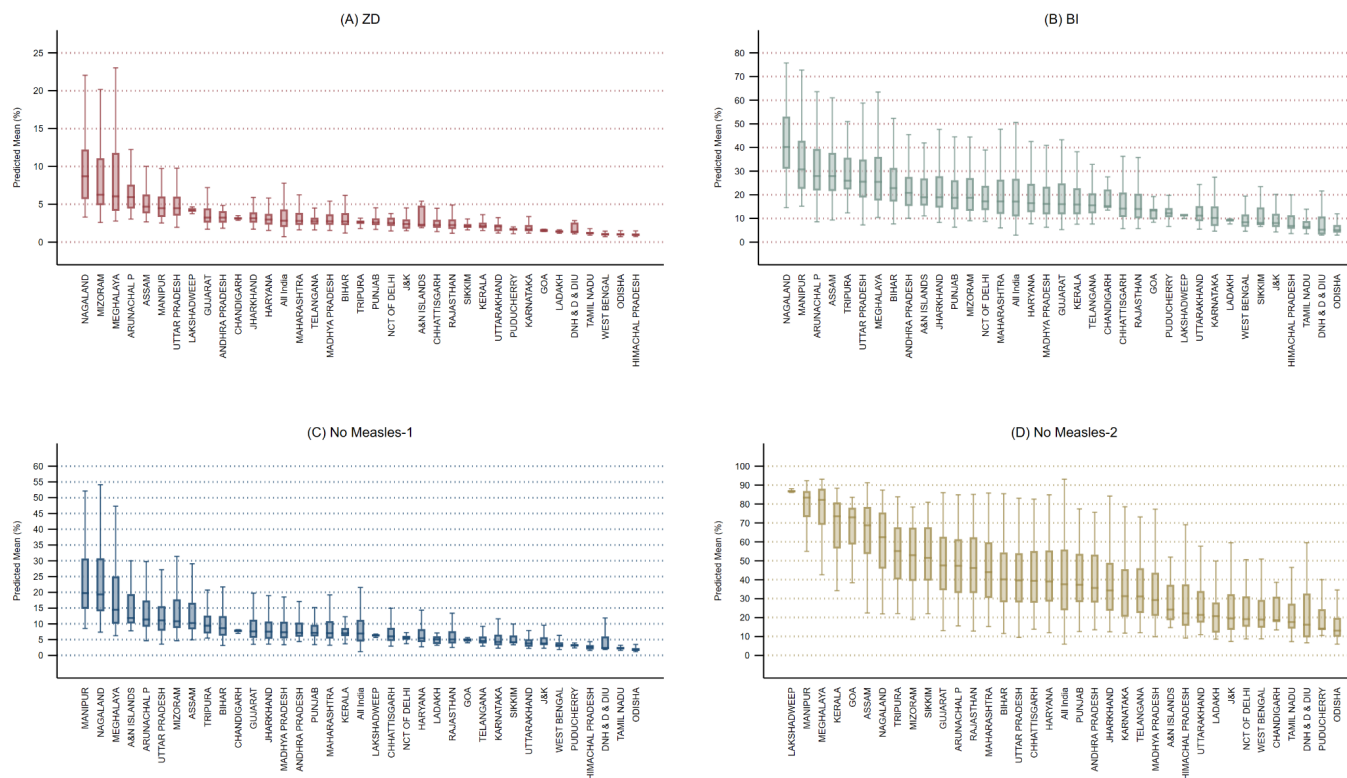

Note: for each plot, the middle bar represents the median, the box represents the interquartile (25th to 75th percentile) range (IQR), and the upper (lower) whiskers are located at the 75th (25th) percentile plus (minus) 1.5 times the IQR. For panels A, B, and C, analyses include 21,771 clusters. For panel D, analyses include 22,068 clusters.

"ZD" - Zero Dose: All surviving children aged 12–23 months who did not receive the first dose of diphtheria, tetanus, and pertussis -containing vaccine.

"BI" - Basic incomplete: All surviving children aged 12–23 months who did not receive 8 basic vaccine doses recommended in the first year of life: 1 dose of Bacillus Calmette-Guérin (BCG) vaccine, 3 doses of pentavalent vaccine, 3 doses of oral polio vaccine, 1 dose of measles-rubella vaccine.

"No MR-1" - All surviving children aged 12-23 months who did not receive the first dose of measles-rubella-containing vaccine.

"No MR-2" - All surviving children aged 24-35 months who did not receive the second dose of measles-rubella-containing vaccine.

**Sensitivity Analysis 1: Analysis excluding singleton clusters**

**Table S6: Cluster distribution by sample size per cluster, sub-optimally vaccinated children, India, National Family Health Survey (NFHS-5) 2019-2021<sup>1</sup>**

| PSU/ Cluster sample size       | Number of Clusters (%)                          |                              |
|--------------------------------|-------------------------------------------------|------------------------------|
|                                | Ages 12-23 months<br>(No DPT/Penta 1 /BI /MR-1) | Ages 24 -36 months<br>(MR-2) |
| All clusters (1 or > children) | 21,771                                          | 22,068                       |
| 2 or more children             | 12,216                                          | 12,420                       |
| 4 or more children             | 10,820                                          | 11,071                       |
| 5 or more children             | 4,936                                           | 4,915                        |

<sup>1</sup>NFHS-5 clusters (primary sampling units - PSUs) comprised 150 to 300 households. In each NFHS-5 cluster, 22 households were sampled at random.

**Table S7: Prevalence of child under-vaccination across states and Union Territories, India, National Family Health Survey (NFHS-5) 2019-2021<sup>1</sup>(sample excluding singleton clusters)**

| State/UT <sup>2</sup> | Children 12-23 months |               |            |                 |                |                 |                |                      |                | Children 24-35 months |            |       |                 |
|-----------------------|-----------------------|---------------|------------|-----------------|----------------|-----------------|----------------|----------------------|----------------|-----------------------|------------|-------|-----------------|
|                       | #<br>Districts        | #<br>Clusters | n (Sample) | ZD <sup>3</sup> |                | BI <sup>4</sup> |                | No MR-1 <sup>5</sup> |                | No MR-2 <sup>6</sup>  |            |       |                 |
|                       |                       |               |            | (%)             | 95% CI         | (%)             | 95% CI         | (%)                  | 95% CI         | #<br>Clusters         | n (Sample) | (%)   | 95% CI          |
| All                   | 707                   | 12216         | 33881      | 6.4             | [05.9; 06.7]   | 24.1            | [23.4; 24.7]   | 12.6                 | [12.1; 13.1]   | 12420                 | 34538      | 41.7  | [40.9; 42.6]    |
| Andaman & Nicobar     | 3                     | 23            | 57         | 2.31            | [0.67; 3.95]   | 18.03           | [6.77; 29.29]  | 14.84                | [4.37; 25.32]  | 13                    | 34         | 18.89 | [10.08; 27.70]  |
| Andhra Pradesh        | 13                    | 142           | 356        | 7.57            | [4.47; 10.67]  | 29.53           | [24.45; 34.61] | 14.58                | [11.13; 18.03] | 139                   | 327        | 44.62 | [38.60; 50.63]  |
| Arunachal Pradesh     | 20                    | 273           | 702        | 13.67           | [10.07; 17.27] | 33.86           | [29.09; 38.64] | 19.02                | [15.06; 22.99] | 299                   | 808        | 46.47 | [42.22; 50.73]  |
| Assam                 | 33                    | 561           | 1503       | 9.37            | [7.49; 11.25]  | 34.47           | [31.62; 37.32] | 18.17                | [15.59; 20.74] | 612                   | 1,689      | 65.98 | [62.84; 69.13]  |
| Bihar                 | 38                    | 1154          | 3585       | 6.23            | [5.24; 7.21]   | 28.79           | [27.00; 30.59] | 14.39                | [13.02; 15.77] | 1121                  | 3,525      | 44.69 | [42.62; 46.75]  |
| Chandigarh            | 1                     | 7             | 15         | 5.46            | [-5.80; 16.72] | 13.24           | [-2.58; 29.07] | 13.24                | [-2.58; 29.07] | 7                     | 19         | 20.85 | [-0.74; 42.43]  |
| Chhattisgarh          | 27                    | 455           | 1204       | 4.65            | [3.07; 6.24]   | 20.66           | [17.27; 24.05] | 10.24                | [7.51; 12.97]  | 466                   | 1,231      | 43.87 | [39.46; 48.27]  |
| Goa                   | 2                     | 17            | 37         | 3.88            | [-3.59; 11.35] | 21.25           | [8.50; 33.99]  | 9.02                 | [-0.99; 19.02] | 17                    | 38         | 72.1  | [53.00; 91.21]  |
| Gujarat               | 33                    | 527           | 1417       | 7.31            | [5.56; 9.06]   | 23.69           | [20.87; 26.51] | 14.08                | [11.65; 16.52] | 532                   | 1,417      | 49.55 | [45.86; 53.24]  |
| Haryana               | 22                    | 379           | 1026       | 5.23            | [3.81; 6.64]   | 23.51           | [20.31; 26.71] | 10.31                | [8.13; 12.49]  | 362                   | 1,026      | 44.3  | [40.59; 48.01]  |
| Himachal Pradesh      | 12                    | 138           | 339        | 1.89            | [-0.28; 4.06]  | 10.13           | [6.38; 13.89]  | 4.63                 | [1.71; 7.56]   | 112                   | 272        | 31.22 | [22.79; 39.66]  |
| Jammu & Kashmir       | 20                    | 274           | 728        | 5.71            | [3.77; 7.65]   | 15.94           | [12.59; 19.29] | 10                   | [7.30; 12.69]  | 346                   | 913        | 25.29 | [21.24; 29.35]  |
| Jharkhand             | 24                    | 559           | 1614       | 7.71            | [5.77; 9.65]   | 26.83           | [24.11; 29.56] | 13.84                | [11.54; 16.13] | 536                   | 1,524      | 40.03 | [36.86; 43.19]  |
| Karnataka             | 30                    | 438           | 1158       | 4.44            | [2.68; 6.21]   | 16.82           | [13.49; 20.15] | 9.39                 | [6.86; 11.92]  | 447                   | 1,150      | 36.29 | [32.40; 40.17]  |
| Kerala                | 14                    | 121           | 292        | 4.15            | [1.62; 6.68]   | 19.07           | [13.91; 24.23] | 10.51                | [6.54; 14.49]  | 147                   | 349        | 65.38 | [59.03; 71.74]  |
| Ladakh                | 2                     | 20            | 53         | 1.47            | [-1.47; 4.42]  | 10.75           | [-1.54; 23.05] | 6.93                 | [0.00; 13.86]  | 33                    | 78         | 24.48 | [10.84; 38.12]  |
| Lakshadweep           | 1                     | 13            | 32         | 9.61            | [2.59; 16.62]  | 16.38           | [6.00; 26.76]  | 9.61                 | [2.59; 16.62]  | 10                    | 30         | 90.24 | [79.03; 101.45] |

|                     |    |      |      |       |                |       |                |       |                |      |       |       |                |
|---------------------|----|------|------|-------|----------------|-------|----------------|-------|----------------|------|-------|-------|----------------|
| Madhya Pradesh      | 51 | 898  | 2446 | 5.59  | [4.53; 6.65]   | 22.17 | [19.94; 24.40] | 11.49 | [10.07; 12.90] | 885  | 2,348 | 34.92 | [32.75; 37.09] |
| Maharashtra         | 36 | 518  | 1324 | 8.14  | [4.77; 11.51]  | 27.33 | [23.61; 31.04] | 15.71 | [12.00; 19.42] | 502  | 1,290 | 49.77 | [44.53; 55.01] |
| Manipur             | 9  | 174  | 456  | 7.13  | [4.51; 9.74]   | 32.35 | [26.44; 38.27] | 23.42 | [18.39; 28.45] | 174  | 483   | 75.99 | [70.50; 81.49] |
| Meghalaya           | 11 | 258  | 1034 | 15.84 | [12.27; 19.41] | 35.38 | [31.21; 39.55] | 27.15 | [23.24; 31.06] | 288  | 1,113 | 73.86 | [69.51; 78.21] |
| Mizoram             | 8  | 145  | 393  | 15.17 | [9.47; 20.88]  | 29.6  | [20.70; 38.50] | 19.79 | [12.21; 27.37] | 129  | 340   | 56.15 | [50.13; 62.17] |
| Nagaland            | 11 | 152  | 408  | 17.58 | [11.96; 23.20] | 45.97 | [38.89; 53.04] | 28.74 | [22.50; 34.97] | 149  | 430   | 55.62 | [49.60; 61.64] |
| D&N Haveli; D & Diu | 3  | 46   | 110  | 1.82  | [-0.01; 3.65]  | 4.27  | [0.88; 7.66]   | 2.63  | [-0.52; 5.78]  | 39   | 108   | 14.23 | [6.40; 22.07]  |
| NCT of Delhi        | 11 | 159  | 428  | 6.32  | [3.31; 9.33]   | 24.19 | [19.30; 29.08] | 9.57  | [6.39; 12.74]  | 165  | 425   | 24.78 | [19.49; 30.07] |
| Odisha              | 30 | 426  | 1110 | 2.89  | [1.67; 4.10]   | 10.46 | [8.05; 12.87]  | 4.52  | [2.78; 6.27]   | 453  | 1,203 | 21.6  | [18.18; 25.01] |
| Puducherry          | 4  | 38   | 97   | 0.27  | [-0.13; 0.68]  | 11.37 | [1.23; 21.51]  | 3.57  | [-1.25; 8.39]  | 39   | 89    | 12    | [4.04; 19.97]  |
| Punjab              | 22 | 294  | 744  | 6.42  | [4.30; 8.54]   | 25.4  | [21.61; 29.18] | 13.16 | [10.26; 16.05] | 310  | 779   | 43.2  | [39.12; 47.28] |
| Rajasthan           | 33 | 723  | 2091 | 4.76  | [3.59; 5.92]   | 19.14 | [17.09; 21.19] | 8.65  | [7.11; 10.18]  | 803  | 2,358 | 48.26 | [45.34; 51.17] |
| Sikkim              | 4  | 27   | 62   | 8.17  | [-0.72; 17.06] | 21.1  | [1.55; 40.66]  | 16.19 | [-1.91; 34.29] | 24   | 62    | 53.47 | [41.05; 65.89] |
| Tamil Nadu          | 32 | 321  | 777  | 2.56  | [1.36; 3.76]   | 9.86  | [7.32; 12.41]  | 4.37  | [2.59; 6.15]   | 319  | 756   | 24.51 | [20.84; 28.18] |
| Telangana           | 31 | 410  | 1037 | 6.35  | [4.20; 8.49]   | 18.92 | [15.57; 22.28] | 8.42  | [6.04; 10.79]  | 380  | 916   | 36.72 | [31.85; 41.59] |
| Tripura             | 8  | 111  | 275  | 4.69  | [2.12; 7.26]   | 29.4  | [24.40; 34.40] | 12.08 | [8.47; 15.68]  | 101  | 241   | 53.33 | [46.19; 60.46] |
| Uttar Pradesh       | 75 | 1889 | 5614 | 9.07  | [8.12; 10.02]  | 30.62 | [29.16; 32.09] | 17.05 | [15.82; 18.27] | 1950 | 5,836 | 41.36 | [39.80; 42.92] |
| Uttarakhand         | 13 | 207  | 517  | 4.71  | [2.27; 7.16]   | 19.01 | [13.39; 24.63] | 9.59  | [5.98; 13.19]  | 204  | 521   | 30.8  | [24.90; 36.71] |
| West Bengal         | 20 | 319  | 840  | 1.8   | [0.73; 2.87]   | 11.72 | [9.28; 14.16]  | 5.17  | [3.42; 6.92]   | 307  | 810   | 28.22 | [23.89; 32.55] |

Note: for each plot, the middle bar represents the median, the box represents the interquartile (25th to 75th percentile) range (IQR), and the upper (lower) whiskers are located at the 75th (25th) percentile plus (minus) 1.5 times the IQR. For panels A, B, and C, analyses include 12,216 clusters. For panel D, analyses include 12,420 clusters.

"ZD" - Zero Dose: All surviving children aged 12–23 months who did not receive the first dose of diphtheria, tetanus, and pertussis -containing vaccine.

"BI" - Basic incomplete: All surviving children aged 12–23 months who did not receive 8 basic vaccine doses recommended in the first year of life: 1 dose of Bacillus Calmette-Guérin (BCG) vaccine, 3 doses of pentavalent vaccine, 3 doses of oral polio vaccine, 1 dose of measles-rubella vaccine.

"No MR-1" - All surviving children aged 12-23 months who did not receive the first dose of measles-rubella-containing vaccine.  
"No MR-2" - All surviving children aged 24-35 months who did not receive the second dose of measles-rubella-containing vaccine.



**Figure S8. Geographic variance partitioning (%) by clusters, districts and states for four indicators of child under-vaccination, National Family Health Survey 2019-21 (NFHS-5), India (sample excluding singleton clusters)**

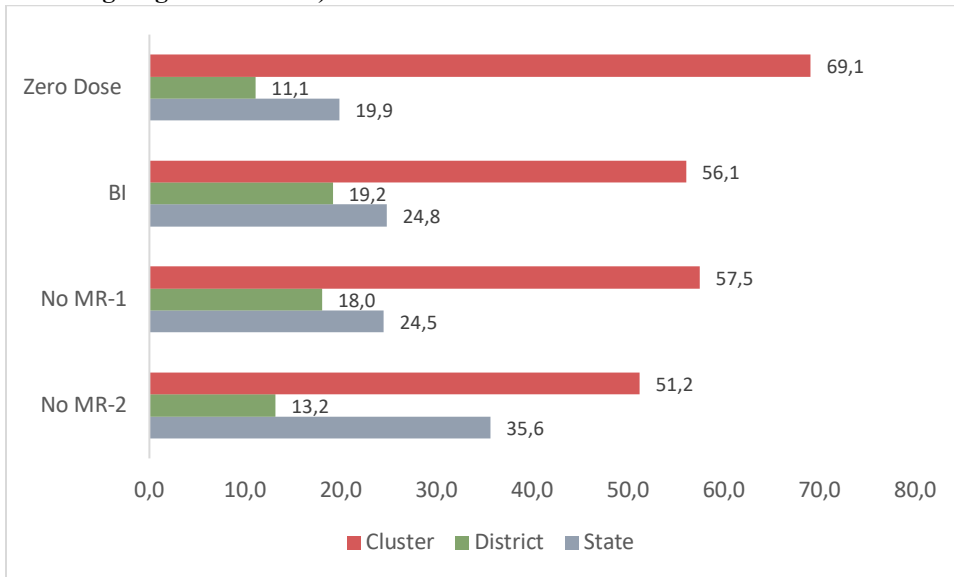

Analyses for Zero Dose, BI and No MR-1 include 12,216 clusters. For No MR-2, analyses include 12,420 clusters.

"Zero Dose" - All surviving children aged 12–23 months who did not receive the first dose of diphtheria, tetanus, and pertussis -containing vaccine.

"BI" - Basic incomplete: All surviving children aged 12–23 months who did not receive 8 basic vaccine doses recommended in the first year of life: 1 dose of Bacillus Calmette-Guérin (BCG) vaccine, 3 doses of pentavalent vaccine, 3 doses of oral polio vaccine, 1 dose of measles-rubella vaccine.

"No MR-1" - All surviving children aged 12-23 months who did not receive the first dose of measles-rubella-containing vaccine.

"No MR-2" - All surviving children aged 24-35 months who did not receive the second dose of measles-rubella-containing vaccine.

**Table S8. Geographic variance partitioning for four indicators of child under-vaccination, NFHS-5, India (sample excluding singleton clusters)**

| Overall                      | ZD               | BI-              | No MR-1          | No MR-2          |
|------------------------------|------------------|------------------|------------------|------------------|
| <b>Variance Partitioning</b> |                  |                  |                  |                  |
| State                        | 0.411<br>(0.135) | 0.355<br>(0.109) | 0.421<br>(0.128) | 0.793<br>(0.238) |
| District                     | 0.229<br>(0.039) | 0.274<br>(0.029) | 0.310<br>(0.036) | 0.293<br>(0.027) |
| Cluster                      | 1.428<br>(0.109) | 0.803<br>(0.050) | 0.989<br>(0.071) | 1.141<br>(0.057) |

Note: Standard errors in parentheses

Analyses for Zero Dose, BI and No MR-1 include 12,216 clusters. For No MR-2, analyses include 12,420 clusters.

"Zero-dose" - All surviving children aged 12–23 months who did not receive the first dose of diphtheria, tetanus, and pertussis -containing vaccine.

"BI " - All surviving children aged 12–23 months who did not receive 8 vaccine doses recommended in the first year of life: 1 dose of Bacillus Calmette-Guérin (BCG) vaccine, 3 doses of pentavalent vaccine, 3 doses of oral polio vaccine, 1 dose of measles-rubella vaccine.

"No MR-1" - All surviving children aged 12-23 months who did not receive the first dose of measles-rubella-containing vaccine.

"No MR-2" - All surviving children aged 24-35 months who did not receive the second dose of measles-rubella-containing vaccine.

**Figure S9: Maps of district-level prevalence and within-district small-area variations in the prevalence of zero-dose (ZD) children and children with basic immunisation incomplete (BI), National Family Health Survey 2019-21, India (sample excluding singleton clusters)**

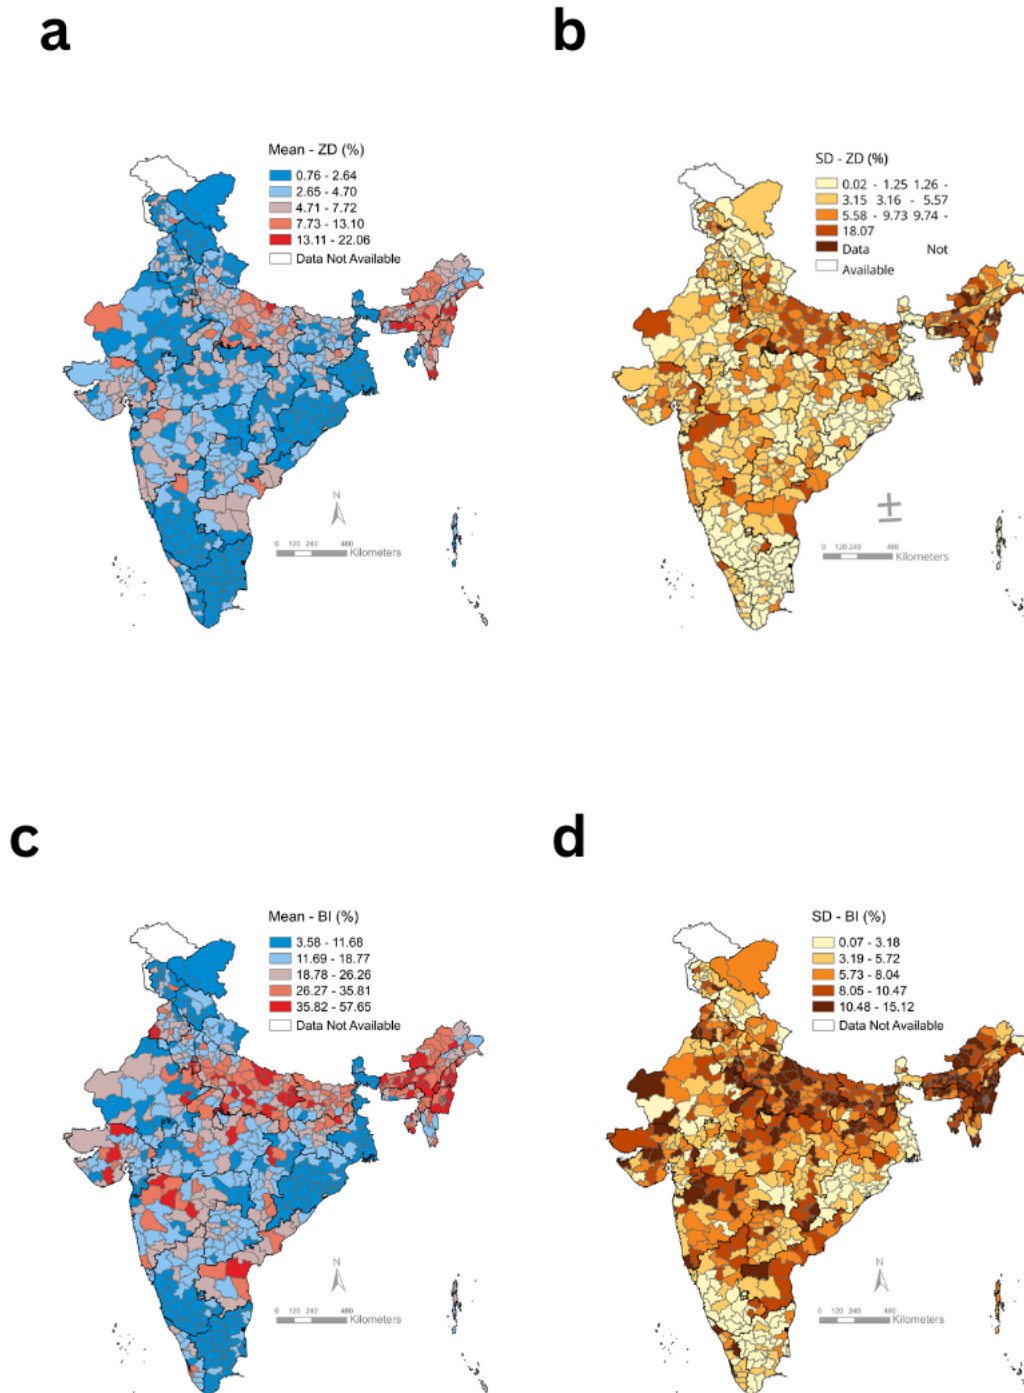

(a) District-level mean and (b) within-district between-cluster standard deviation (SD) for zero-dose child prevalence; (c) District-level mean and (d) within-district between-cluster SD for child prevalence with basic immunisation incomplete.

**Figure S10: Maps of district-level prevalence and within-district small-area variations in the prevalence of non-receipt of measles-rubella (MR) vaccination, National Family Health Survey 2019-21, India (sample excluding singleton clusters)**

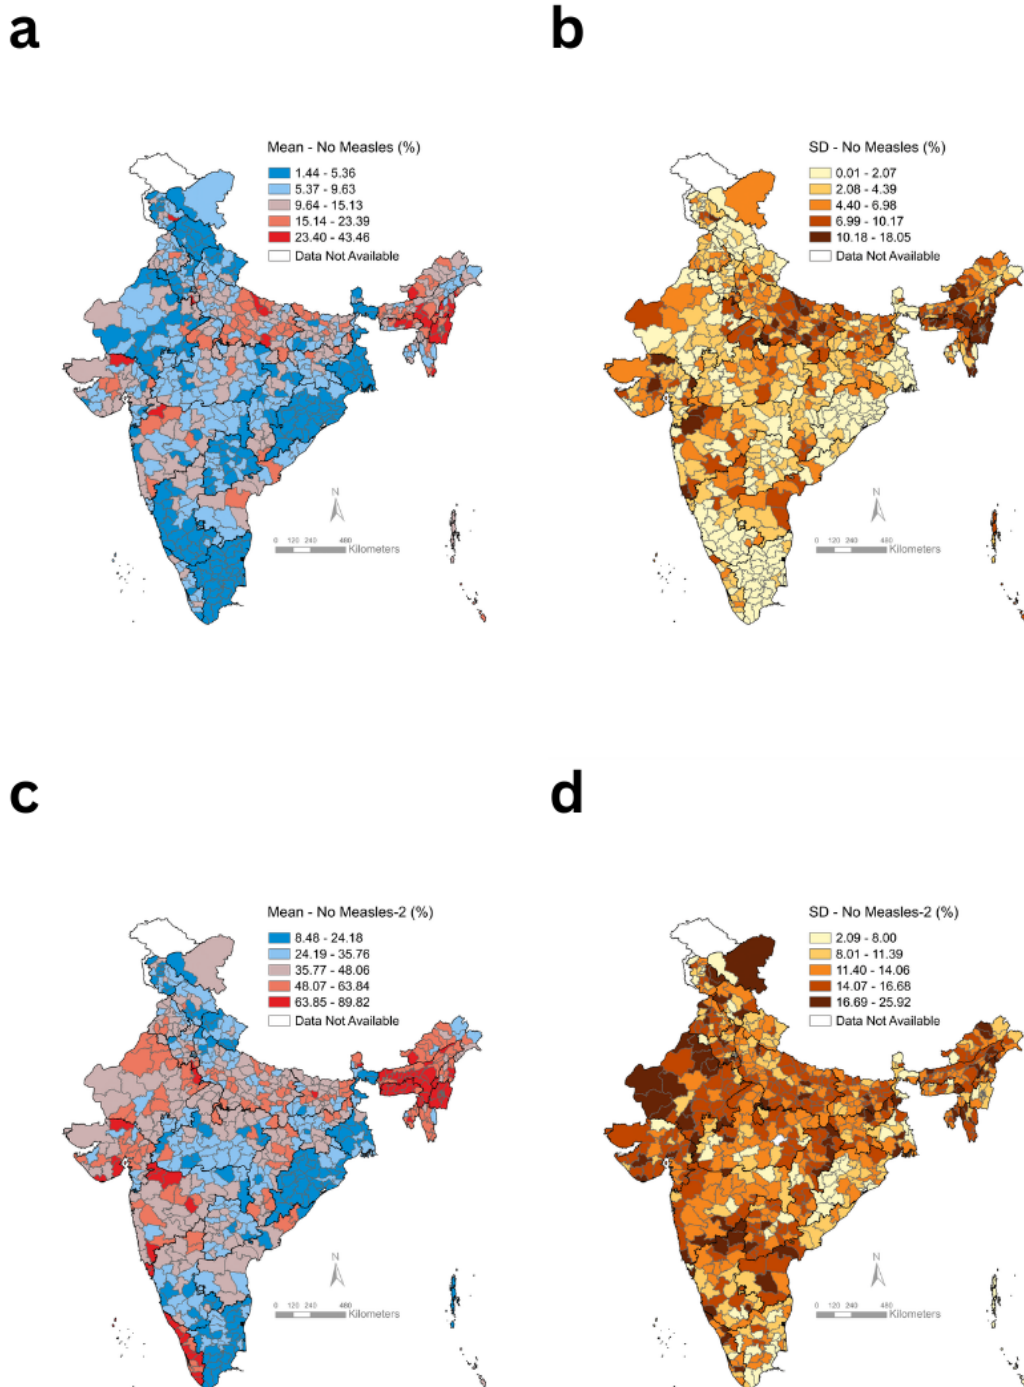

(a) District-level prevalence and (b) within-district between-cluster standard deviation (SD) for non-receipt of MR first dose; (c) District-level prevalence and (d) within-district between-cluster SD for non-receipt of MR second dose.

**Figure S11. Box plots of predicted small-area cluster<sup>1</sup> mean prevalence for four indicators of under-vaccination across states and Union Territories, National Family Health Survey 2019-21, India (sample excluding singleton clusters)**

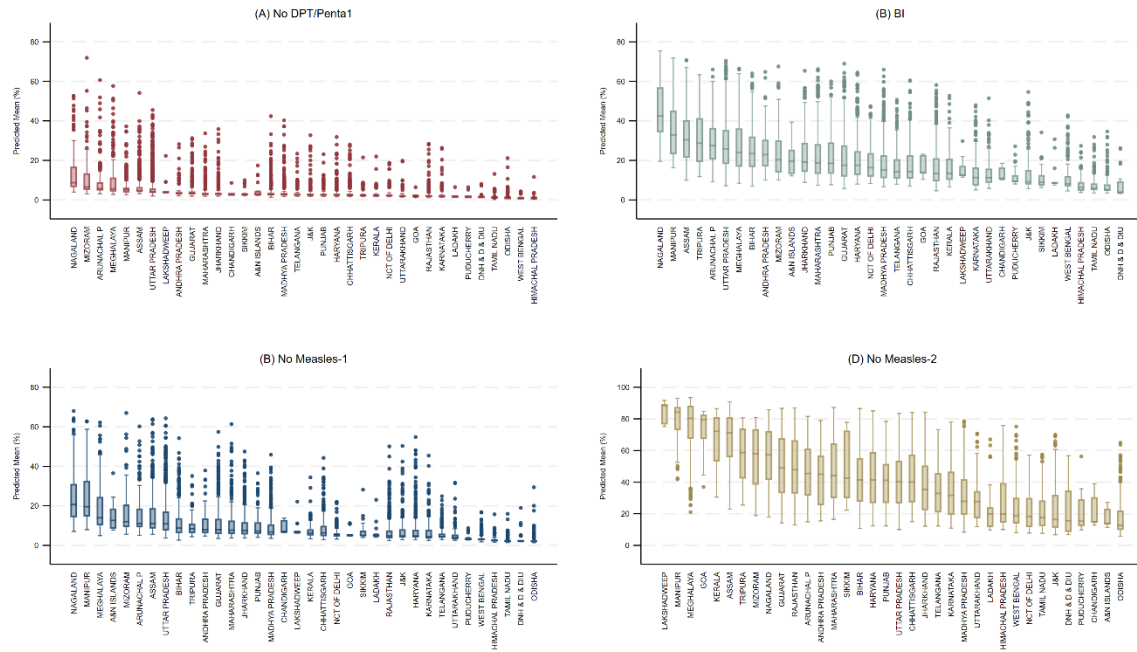

Note: for each plot, the middle bar represents the median, the box represents the interquartile (25th to 75th percentile) range (IQR), and the upper (lower) whiskers are located at the 75th (25th) percentile plus (minus) 1.5 times the IQR. For panels A, B, and C, analyses include 12,216 clusters. For panel D, analyses include 12,420 clusters.

"ZD" - Zero Dose: All surviving children aged 12–23 months who did not receive the first dose of diphtheria, tetanus, and pertussis -containing vaccine.

"BI" - Basic incomplete: All surviving children aged 12–23 months who did not receive 8 basic vaccine doses recommended in the first year of life: 1 dose of Bacillus Calmette-Guérin (BCG) vaccine, 3 doses of pentavalent vaccine, 3 doses of oral polio vaccine, 1 dose of measles-rubella vaccine.

"No MR-1" - All surviving children aged 12-23 months who did not receive the first dose of measles-rubella-containing vaccine.

"No MR-2" - All surviving children aged 24-35 months who did not receive the second dose of measles-rubella-containing vaccine.

**Figure S12. Box plots of predicted small-area cluster<sup>1</sup> mean prevalence for four indicators of under-vaccination across states and Union Territories, National Family Health Survey 2019-21, India (sample excluding singleton clusters, no outliers)**

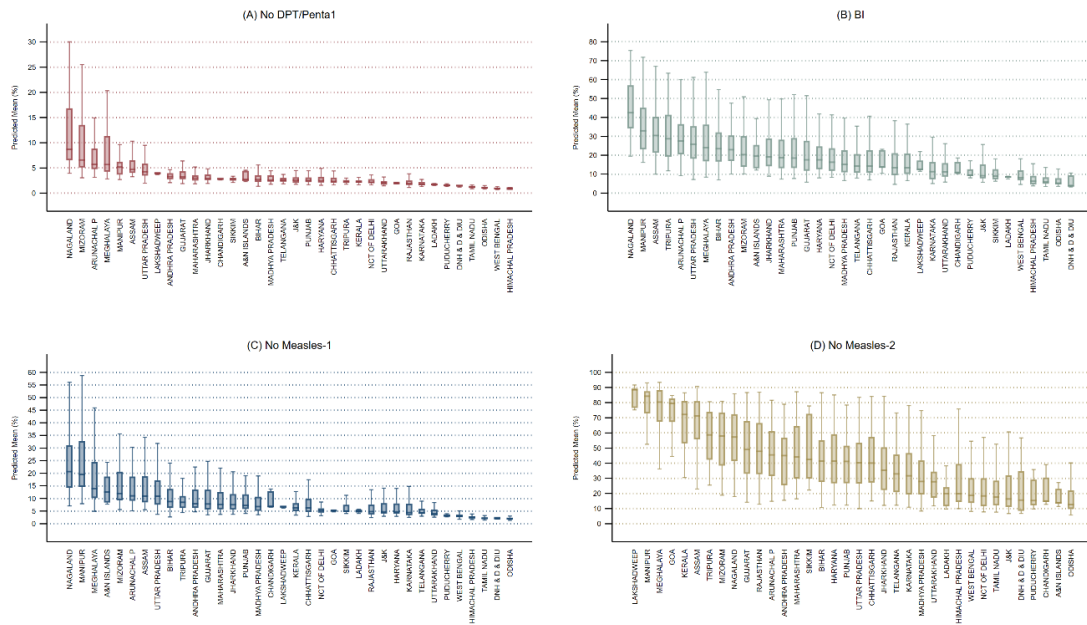

Note: for each plot, the middle bar represents the median, the box represents the interquartile (25th to 75th percentile) range (IQR), and the upper (lower) whiskers are located at the 75th (25th) percentile plus (minus) 1.5 times the IQR. For panels A, B, and C, analyses include 12,216 clusters. For panel D, analyses include 12,420 clusters.

"ZD" - Zero Dose: All surviving children aged 12–23 months who did not receive the first dose of diphtheria, tetanus, and pertussis -containing vaccine.

"BI" - Basic incomplete: All surviving children aged 12–23 months who did not receive 8 basic vaccine doses recommended in the first year of life: 1 dose of Bacillus Calmette-Guérin (BCG) vaccine, 3 doses of pentavalent vaccine, 3 doses of oral polio vaccine, 1 dose of measles-rubella vaccine.

"No MR-1" - All surviving children aged 12-23 months who did not receive the first dose of measles-rubella-containing vaccine.

"No MR-2" - All surviving children aged 24-35 months who did not receive the second dose of measles-rubella-containing vaccine.

**Table S9. Geographic variance partitioning for four indicators of child under-vaccination, NFHS-5, India (sample with 5 or more children per cluster)**

| Overall                      | ZD               | BI-              | No MR-1          | No MR-2          |
|------------------------------|------------------|------------------|------------------|------------------|
| <b>Variance Partitioning</b> |                  |                  |                  |                  |
| State                        | 0.198<br>(0.161) | 0.158<br>(0.094) | 0.136<br>(0.157) | 0.577<br>(0.029) |
| District                     | 0.010<br>(0.013) | 0.253<br>(0.090) | 0.275<br>(0.137) | 0.381<br>(0.380) |
| Cluster                      | 1.398<br>(0.247) | 0.686<br>(0.126) | 1.039<br>(0.174) | 1.091<br>(0.144) |

Note: Standard errors in parentheses

Analyses for Zero Dose, BI and No MR-1 include 4,936 clusters. For No MR-2, analyses include 4,915 clusters.

"Zero-dose" - All surviving children aged 12–23 months who did not receive the first dose of diphtheria, tetanus, and pertussis -containing vaccine.

"BI " - All surviving children aged 12–23 months who did not receive 8 vaccine doses recommended in the first year of life: 1 dose of Bacillus Calmette-Guérin (BCG) vaccine, 3 doses of pentavalent vaccine, 3 doses of oral polio vaccine, 1 dose of measles-rubella vaccine.

"No MR-1" - All surviving children aged 12-23 months who did not receive the first dose of measles-rubella-containing vaccine.

"No MR-2" - All surviving children aged 24-35 months who did not receive the second dose of measles-rubella-containing vaccine.

**Figure S13. Box plots of predicted small-area cluster<sup>1</sup> mean prevalence for four indicators of under-vaccination across states and Union Territories, National Family Health Survey 2019-21, India (sample including clusters with 5 or more children)**

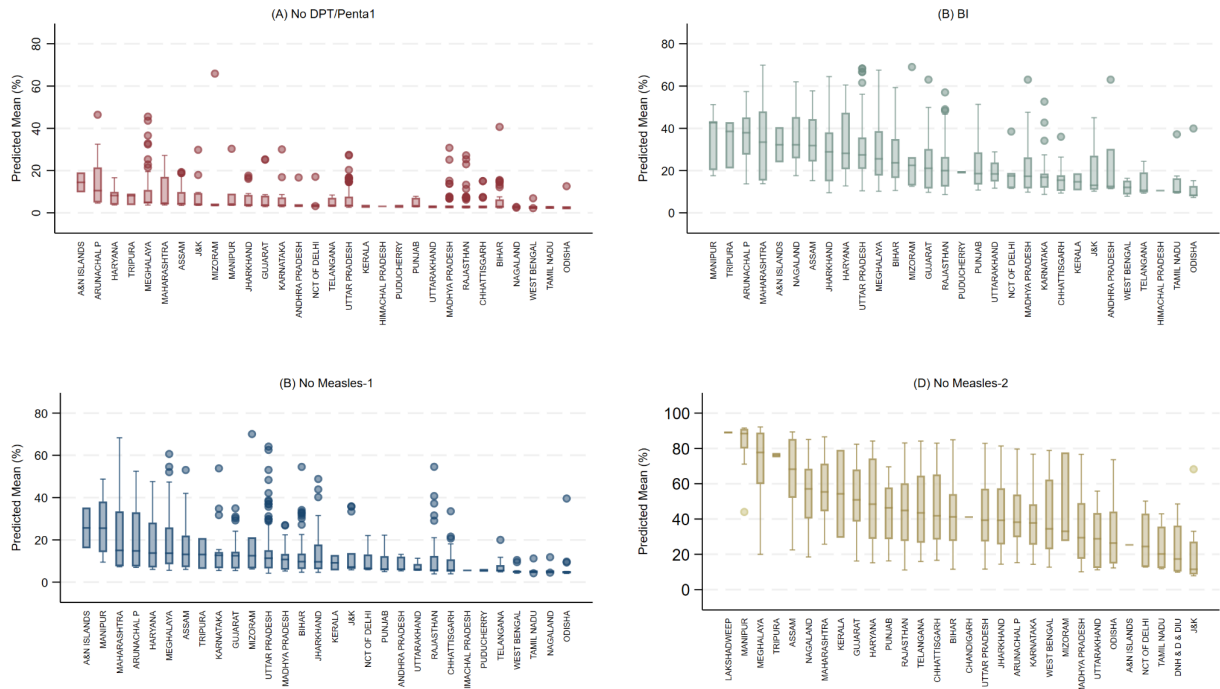

Note: for each plot, the middle bar represents the median, the box represents the interquartile (25th to 75th percentile) range (IQR), and the upper (lower) whiskers are located at the 75th (25th) percentile plus (minus) 1.5 times the IQR. For panels A, B, and C, analyses include 4,936 clusters. For panel D, analyses include 4,915 clusters.

"ZD" - Zero Dose: All surviving children aged 12–23 months who did not receive the first dose of diphtheria, tetanus, and pertussis -containing vaccine.

"BI" - Basic incomplete: All surviving children aged 12–23 months who did not receive 8 basic vaccine doses recommended in the first year of life: 1 dose of Bacillus Calmette-Guérin (BCG) vaccine, 3 doses of pentavalent vaccine, 3 doses of oral polio vaccine, 1 dose of measles-rubella containing vaccine.

"No MR-1" - All surviving children aged 12-23 months who did not receive the first dose of measles-rubella-containing vaccine.

"No MR-2" - All surviving children aged 24-35 months who did not receive the second dose of measles-rubella-containing vaccine.



## Sensitivity Analysis 2: Decomposition of the Basic Immunisation Incomplete indicator

**Table S10. Geographic variance partitioning for failure to receive DTP3/PENTA3 and OPV3, NFHS-5, India**

| Full Sample (All Clusters)                        | No DTP/Penta3 |       | No OPV3    |       |
|---------------------------------------------------|---------------|-------|------------|-------|
|                                                   | Mean          | SD    | Mean       | SD    |
| State                                             | 0.40 (26%)    | 0.121 | 0.33 (22%) | 0.099 |
| District                                          | 0.23 (15%)    | 0.027 | 0.26 (18%) | 0.026 |
| Cluster                                           | 0.92 (59%)    | 0.079 | 0.88 (60%) | 0.058 |
| <b>Sub-sample (clusters excluding singletons)</b> |               |       |            |       |
| State                                             | 0.40 (25%)    | 0.129 | 0.34 (23%) | 0.105 |
| District                                          | 0.27 (17%)    | 0.034 | 0.26 (18%) | 0.029 |
| Cluster                                           | 0.95 (59%)    | 0.076 | 0.87 (59%) | 0.055 |

Note: Standard errors in parentheses

"DTP3/PENTA3" - All surviving children aged 12–23 months who did not receive three doses of diphtheria, tetanus, and pertussis -containing vaccine.

"OPV3" - All surviving children aged 12–23 months who did not receive three doses of oral polio vaccine first dose of diphtheria, tetanus, and pertussis -containing vaccine.

Figure S14. Maps of district-level mean prevalence and within-district small-area variations in the prevalence of children without three doses of oral polio vaccine, NFHS-5, India (sample: all clusters)

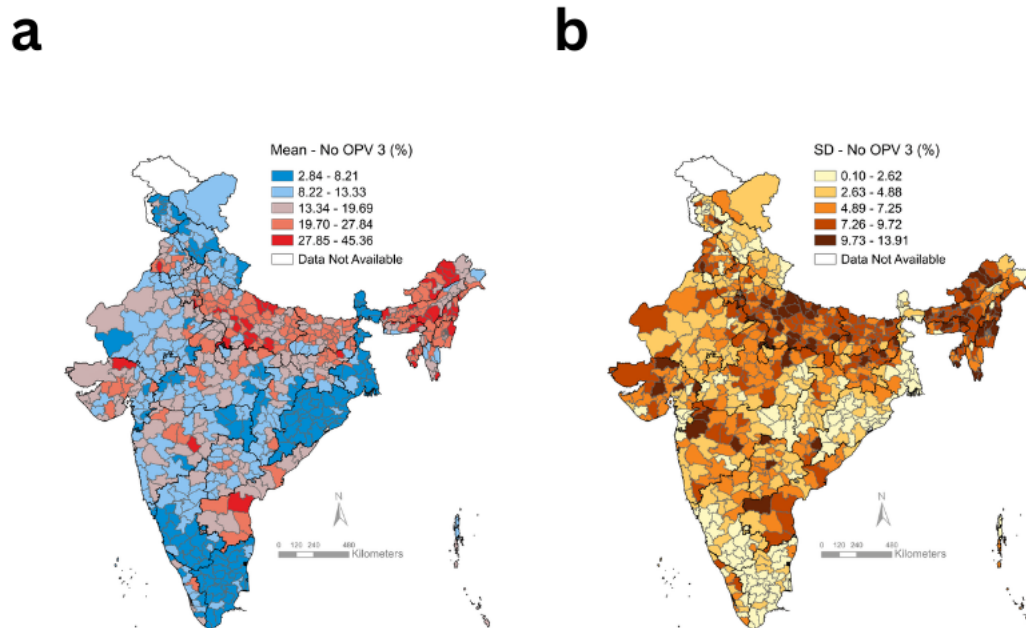

(a) District-level prevalence and (b) within-district between-cluster standard deviation (SD) for non-receipt of three doses of oral polio vaccine.

"OPV3" - All surviving children aged 12–23 months who did not receive three doses of oral polio vaccine first dose of diphtheria, tetanus, and pertussis -containing vaccine.

Analyses include all 21,771 clusters.

Figure S15. Maps of district-level mean prevalence and within-district small-area variations in the prevalence of children without three doses of diphtheria-tetanus-pertussis-containing vaccine, NFHS-5, India (sample: all clusters)

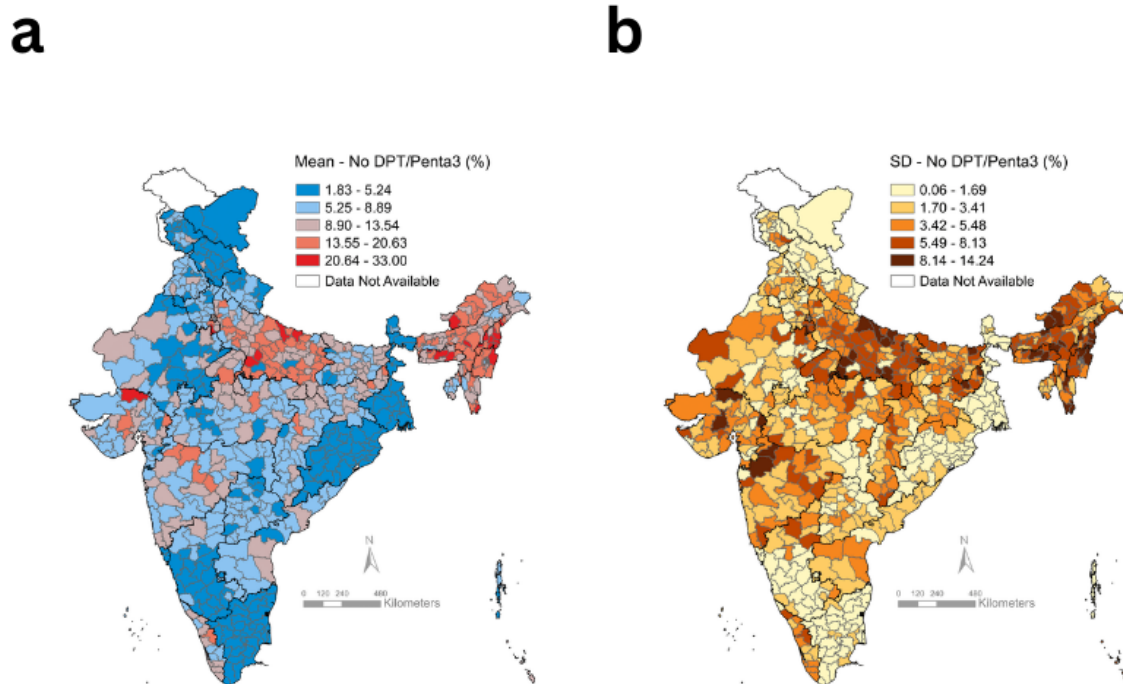

(a) District-level prevalence and (b) within-district between-cluster standard deviation (SD) for non-receipt of three doses of DTP3/ PENTA3 vaccine.

"DTP3/PENTA3" - All surviving children aged 12–23 months who did not receive three doses of diphtheria, tetanus, and pertussis -containing vaccine.

Analyses include all 21,771 clusters.

Figure S16. Box plots of predicted small-area cluster<sup>1</sup> mean prevalence of children without three doses of oral polio vaccine (OPV3) across states and Union Territories, National Family Health Survey 2019-21, India (sample: all clusters)

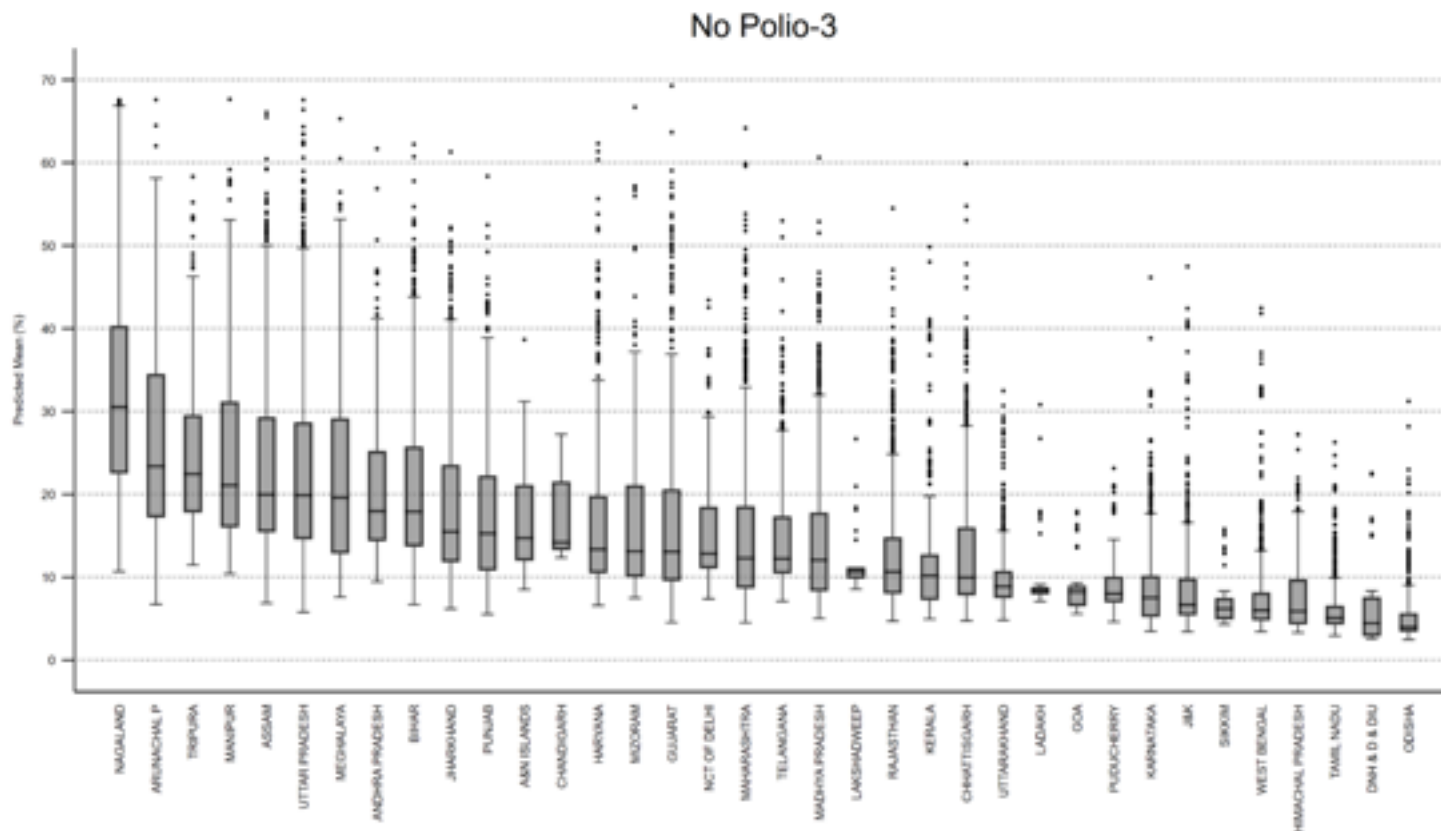

Note: for each plot, the middle bar represents the median, the box represents the interquartile (25th to 75th percentile) range (IQR), and the upper (lower) whiskers are located at the 75th (25th) percentile plus (minus) 1.5 times the IQR. Analyses include all 21,771 clusters.

"OPV3" - All surviving children aged 12–23 months who did not receive three doses of oral polio vaccine .

Figure S17. Box plots of predicted small-area cluster<sup>1</sup> mean prevalence of children without three doses of oral polio vaccine (OPV3) across states and Union Territories, National Family Health Survey 2019-21, India (sample excluding singleton clusters)

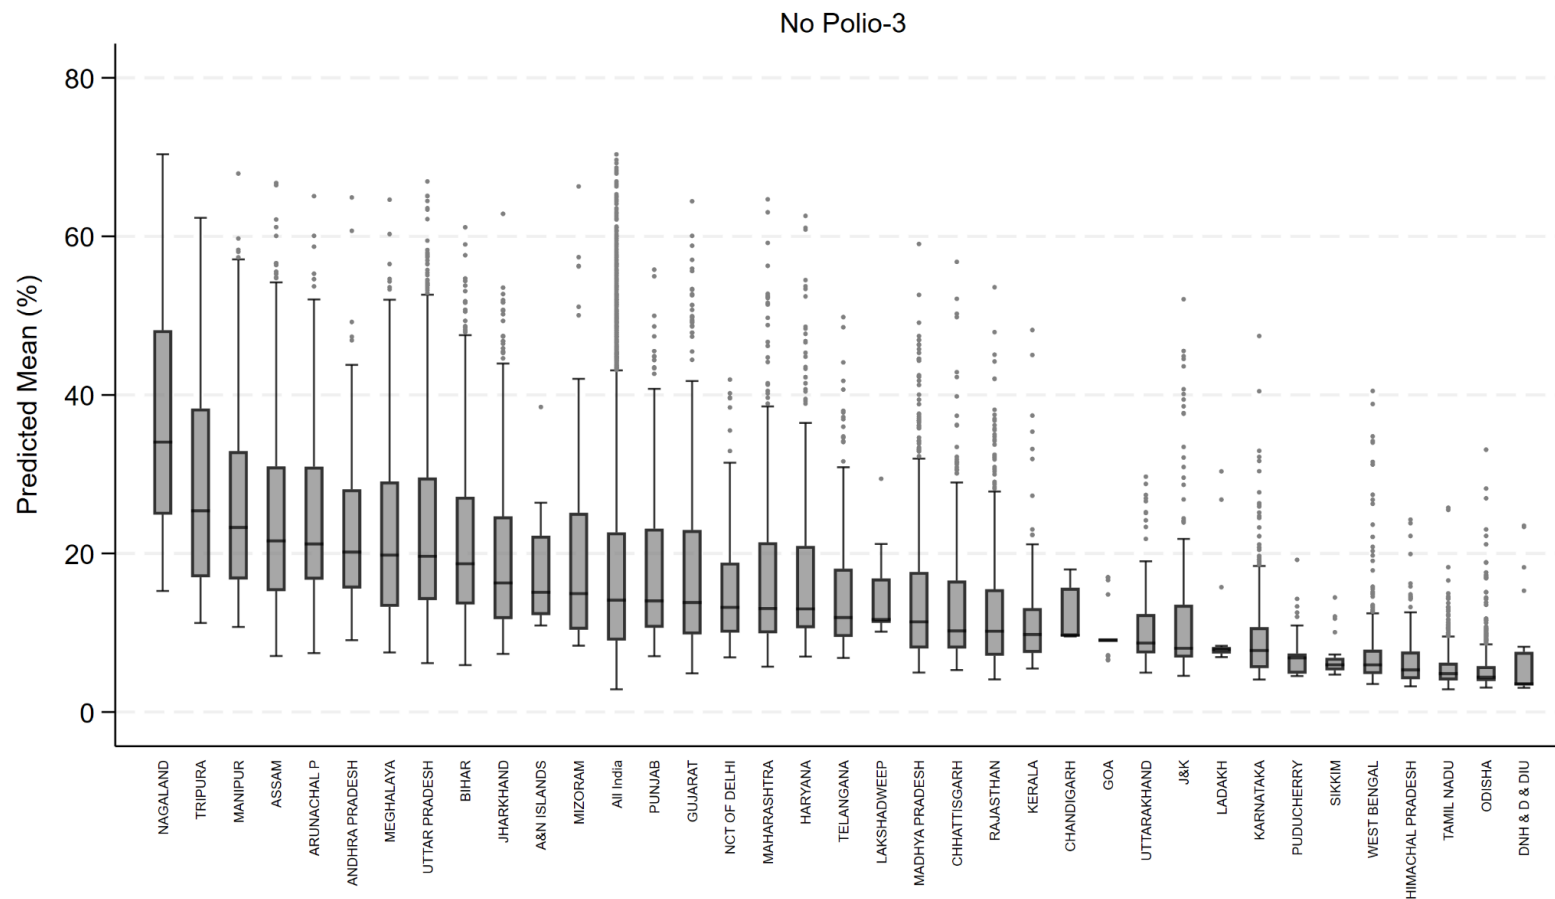

Note: for each plot, the middle bar represents the median, the box represents the interquartile (25th to 75th percentile) range (IQR), and the upper (lower) whiskers are located at the 75th (25th) percentile plus (minus) 1.5 times the IQR. Analyses include 12,212 clusters.

"OPV3" - All surviving children aged 12–23 months who did not receive three doses of oral polio vaccine.

Figure S18. Box plots of predicted small-area cluster<sup>1</sup> mean prevalence of children without three doses of diphtheria-tetanus-pertussis-containing vaccine across states and Union Territories, National Family Health Survey 2019-21, India (sample: all clusters)

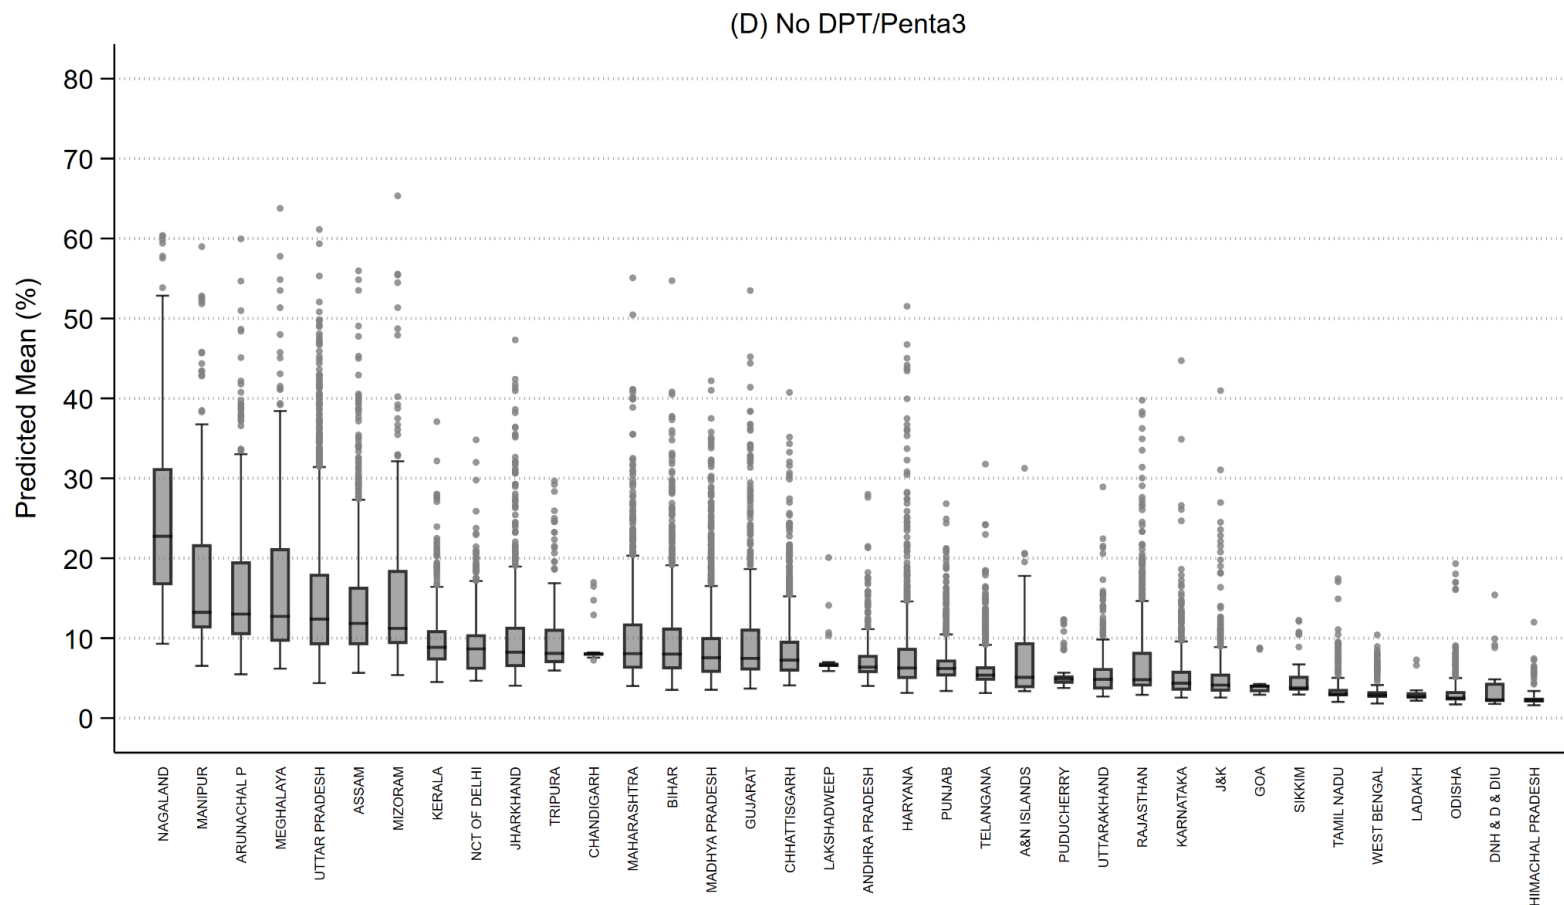

Note: for each plot, the middle bar represents the median, the box represents the interquartile (25th to 75th percentile) range (IQR), and the upper (lower) whiskers are located at the 75th (25th) percentile plus (minus) 1.5 times the IQR. Analyses include all 21,771 clusters.

"DTP3/PENTA3" - All surviving children aged 12–23 months who did not receive three doses of diphtheria, tetanus, and pertussis -containing vaccine.

Figure S19. Box plots of predicted small-area cluster<sup>1</sup> mean prevalence of children without three doses of diphtheria-tetanus-pertussis-containing vaccine across states and Union Territories, National Family Health Survey 2019-21, India (sample excluding singleton clusters)

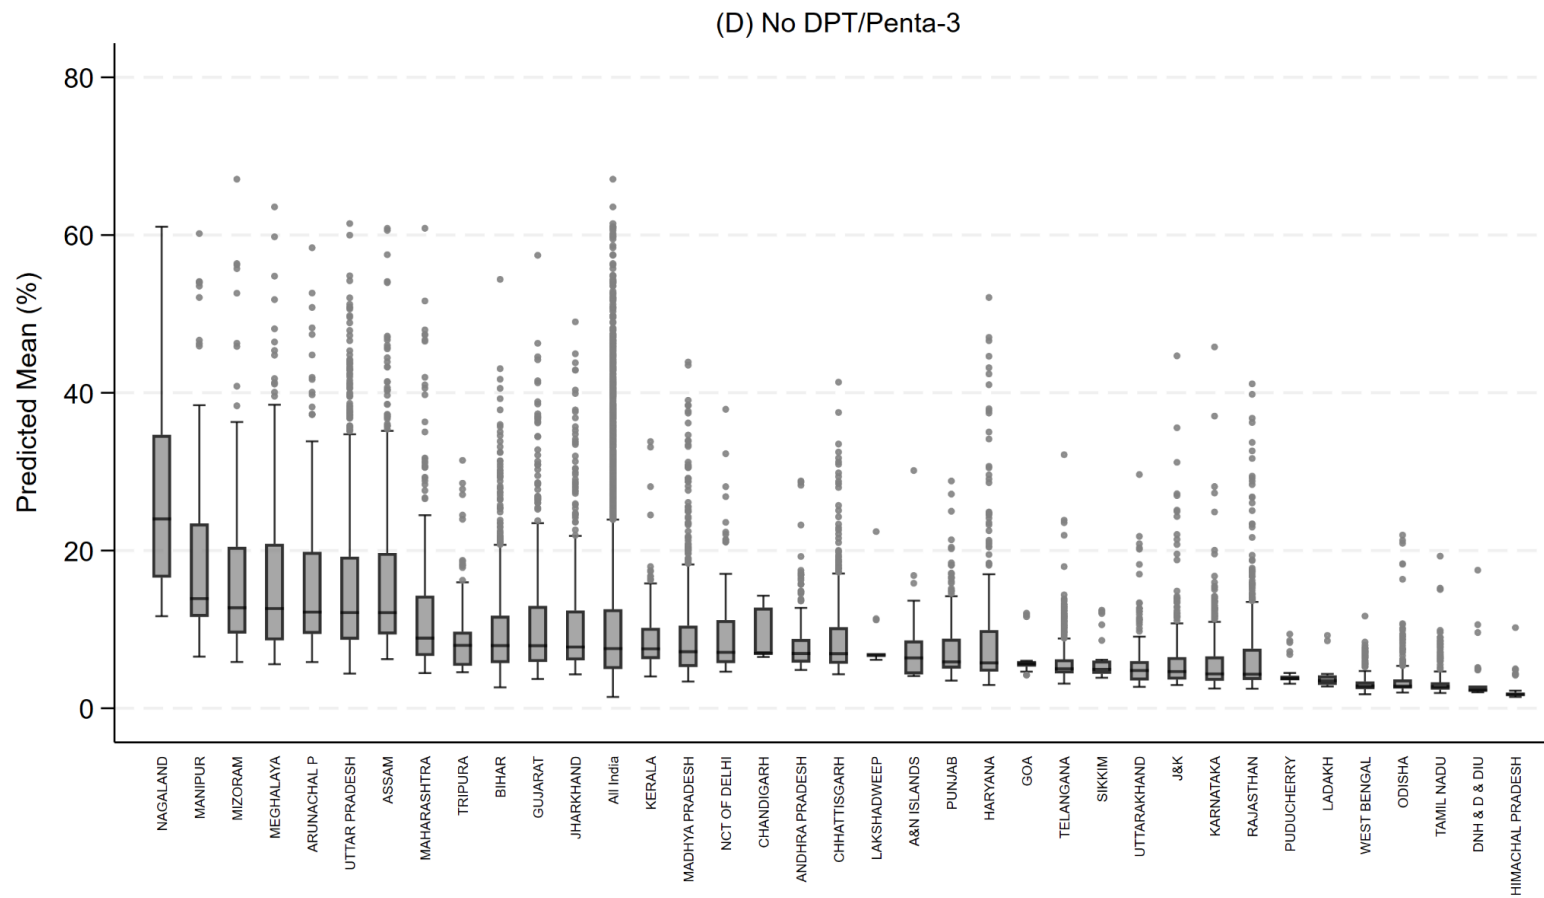

Note: for each plot, the middle bar represents the median, the box represents the interquartile (25th to 75th percentile) range (IQR), and the upper (lower) whiskers are located at the 75th (25th) percentile plus (minus) 1.5 times the IQR. Analyses include 12,216 clusters.

"DTP3/PENTA3" - All surviving children aged 12–23 months who did not receive three doses of diphtheria, tetanus, and pertussis -containing vaccine.

### Sensitivity Analysis 3: Child age

**Table S11. Prevalence of under-vaccination outcomes among children by age groups, NFHS-5, India**

| <b>Variable</b>      | <b>Mean (%) - 12-23 Months</b> | <b>Mean (%) - 24-35 months</b> | <b>Mean (%) - 12-35 Months</b> |
|----------------------|--------------------------------|--------------------------------|--------------------------------|
| <b>ZD</b>            | 6.10                           | 6.69                           | 6.41                           |
| <b>BI</b>            | 23.40                          | 24.37                          | 23.90                          |
| <b>No MR-1</b>       | 12.15                          | 11.62                          | 11.88                          |
| <b>No DPT/Penta3</b> | 12.09                          | 11.30                          | 11.69                          |
| <b>No OPV-3</b>      | 19.54                          | 20.47                          | 20.01                          |

Note: Analyses included 43,436 children 12 to 23 months and 44,186 children 12-35 months.



## References

1. International Institute for Population Sciences (IIPS). National Family Health Survey (MCH and Family Planning), India 1992–93. Bombay: IIPS, 1995.
2. International Institute for Population Sciences (IIPS) and ORC Macro. National Family Health Survey (NFHS-2), 1998-99: India. Mumbai: IIPS, 2000.
3. International Institute for Population Sciences (IIPS) and Macro International. National Family Health Survey (NFHS-3), 2005-06: India: Volume I. Mumbai: IIPS, 2007.
4. International Institute for Population Sciences (IIPS) and ICF. National Family Health Survey (NFHS-4), 2015-16: India. Mumbai IIPS, 2017.
5. International Institute for Population Sciences II, Icf. India national family health survey NFHS-5 2019-21. Mumbai, India: IIPS and ICF, 2022.
